# Supplementary material for: The effect of ring size variation on the structure and stability of lanthanide(iii) complexes with crown ethers containing picolinate pendants
Source: Royal Society of Chemistry journal article supplement (doi:10.1039/c0dt00746c), 2010-11-29
Supplement: c0dt00746c.pdf [file c0dt00746c.pdf]

## **The Effect of Ring Size Variation on the Structure and Stability of Lanthanide(III) Complexes with Crown Ethers Containing Picolinate Pendants†**

Adrián Roca-Sabio,<sup>a</sup> Marta Mato-Iglesias,<sup>a</sup> David Esteban-Gómez,<sup>a</sup> Andrés de Blas,<sup>a</sup> Teresa Rodríguez-Blas\*<sup>a</sup> and Carlos Platas-Iglesias\*<sup>a</sup>

Supporting Information (72 pages)

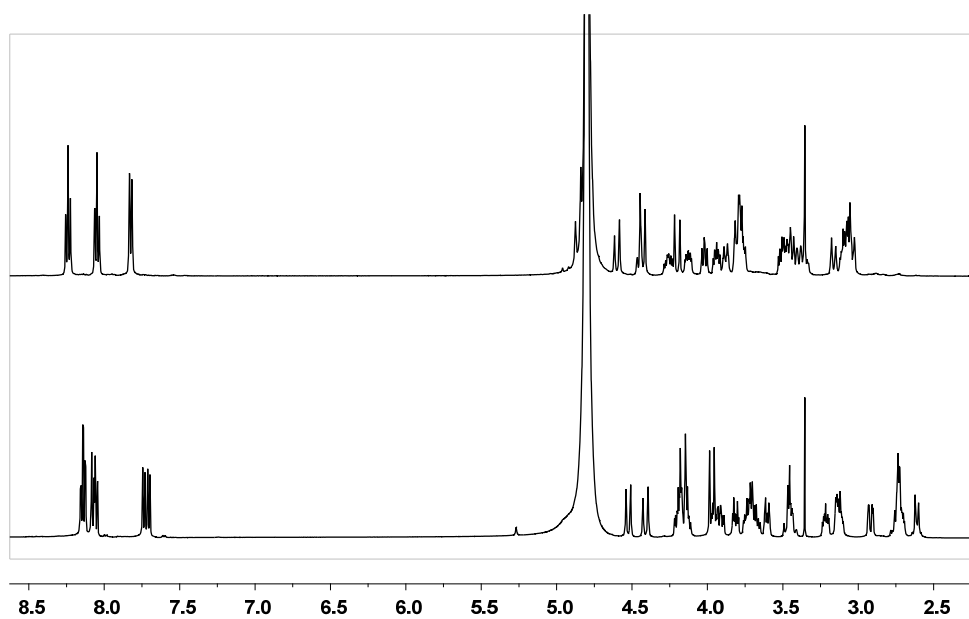

Figure S1. <sup>1</sup>H NMR spectra (500 MHz) of [Lu(bp15c5)]<sup>+</sup> (top) and [La(bp15c5)]<sup>+</sup> (bottom) complexes recorded in D<sub>2</sub>O solution (pD = 7.0) at 298 K.

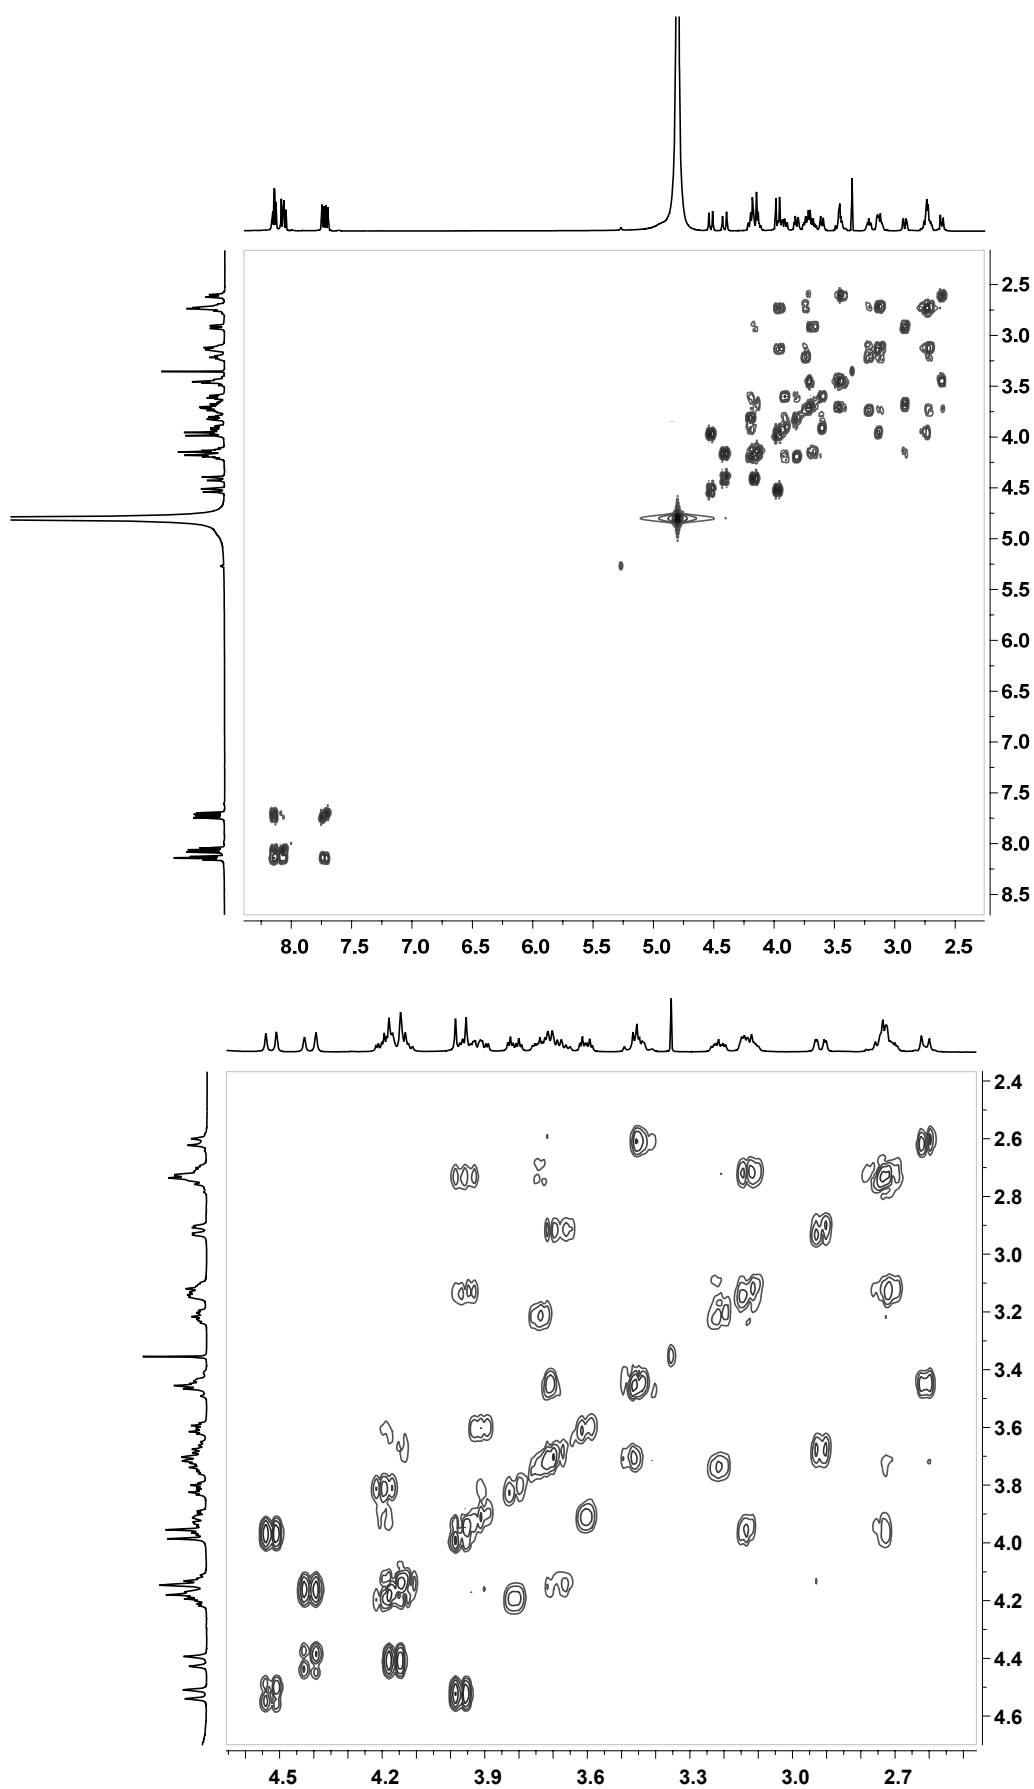

Figure S2.  $^1\text{H}$ - $^1\text{H}$ -COSY NMR spectrum of  $[\text{La}(\text{bp15c5})]^+$  recorded in  $\text{D}_2\text{O}$  solution (pD = 7.0) at 298 K.

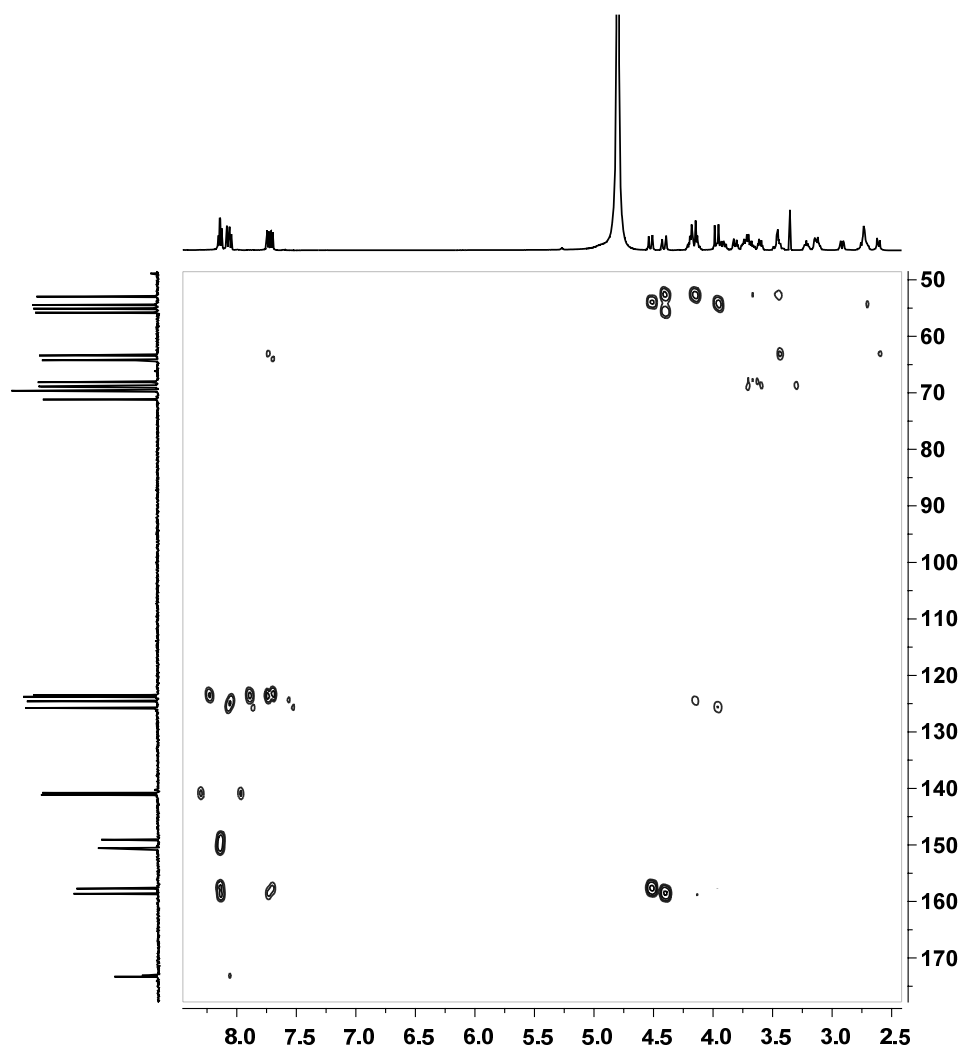

Figure S3.  $^1\text{H}$ - $^{13}\text{C}$ -HMBC NMR spectrum of  $[\text{La}(\text{bp}15\text{c}5)]^+$  recorded in  $\text{D}_2\text{O}$  solution (pD = 7.0) at 298 K.

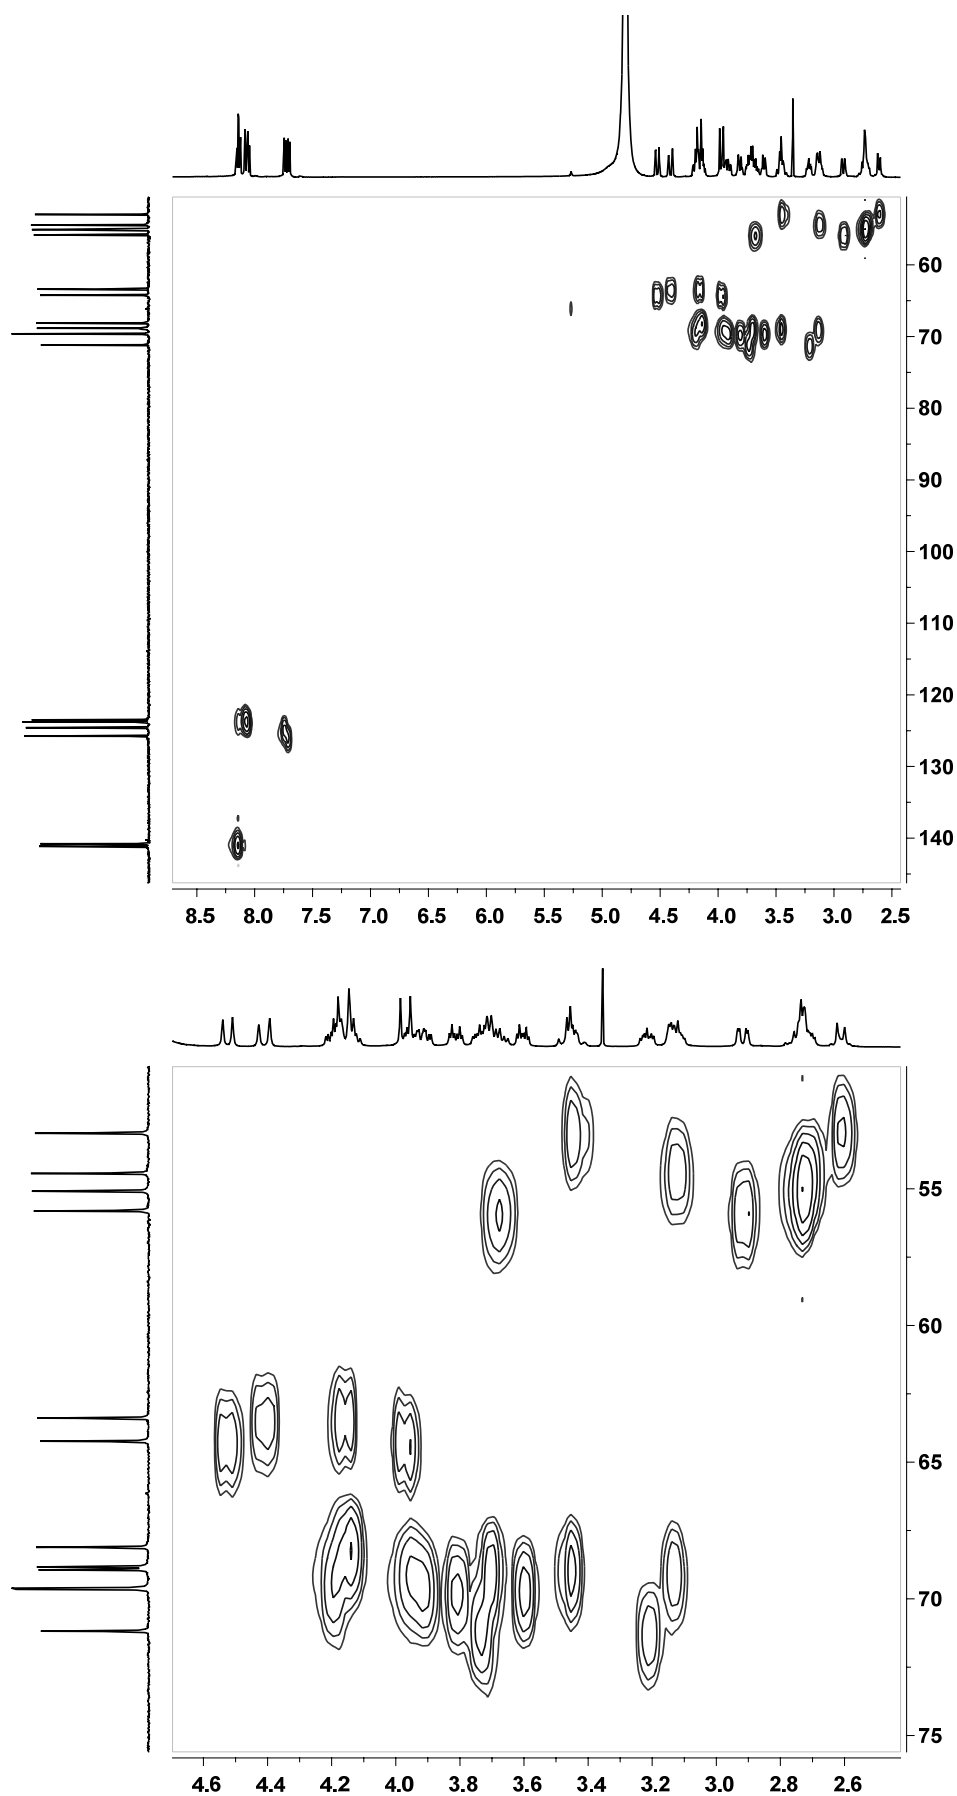

Figure S4.  $^1\text{H}$ - $^{13}\text{C}$ -HSQC NMR spectrum of  $[\text{La}(\text{bp15c5})]^+$  recorded in  $\text{D}_2\text{O}$  solution (pD = 7.0) at 298 K.

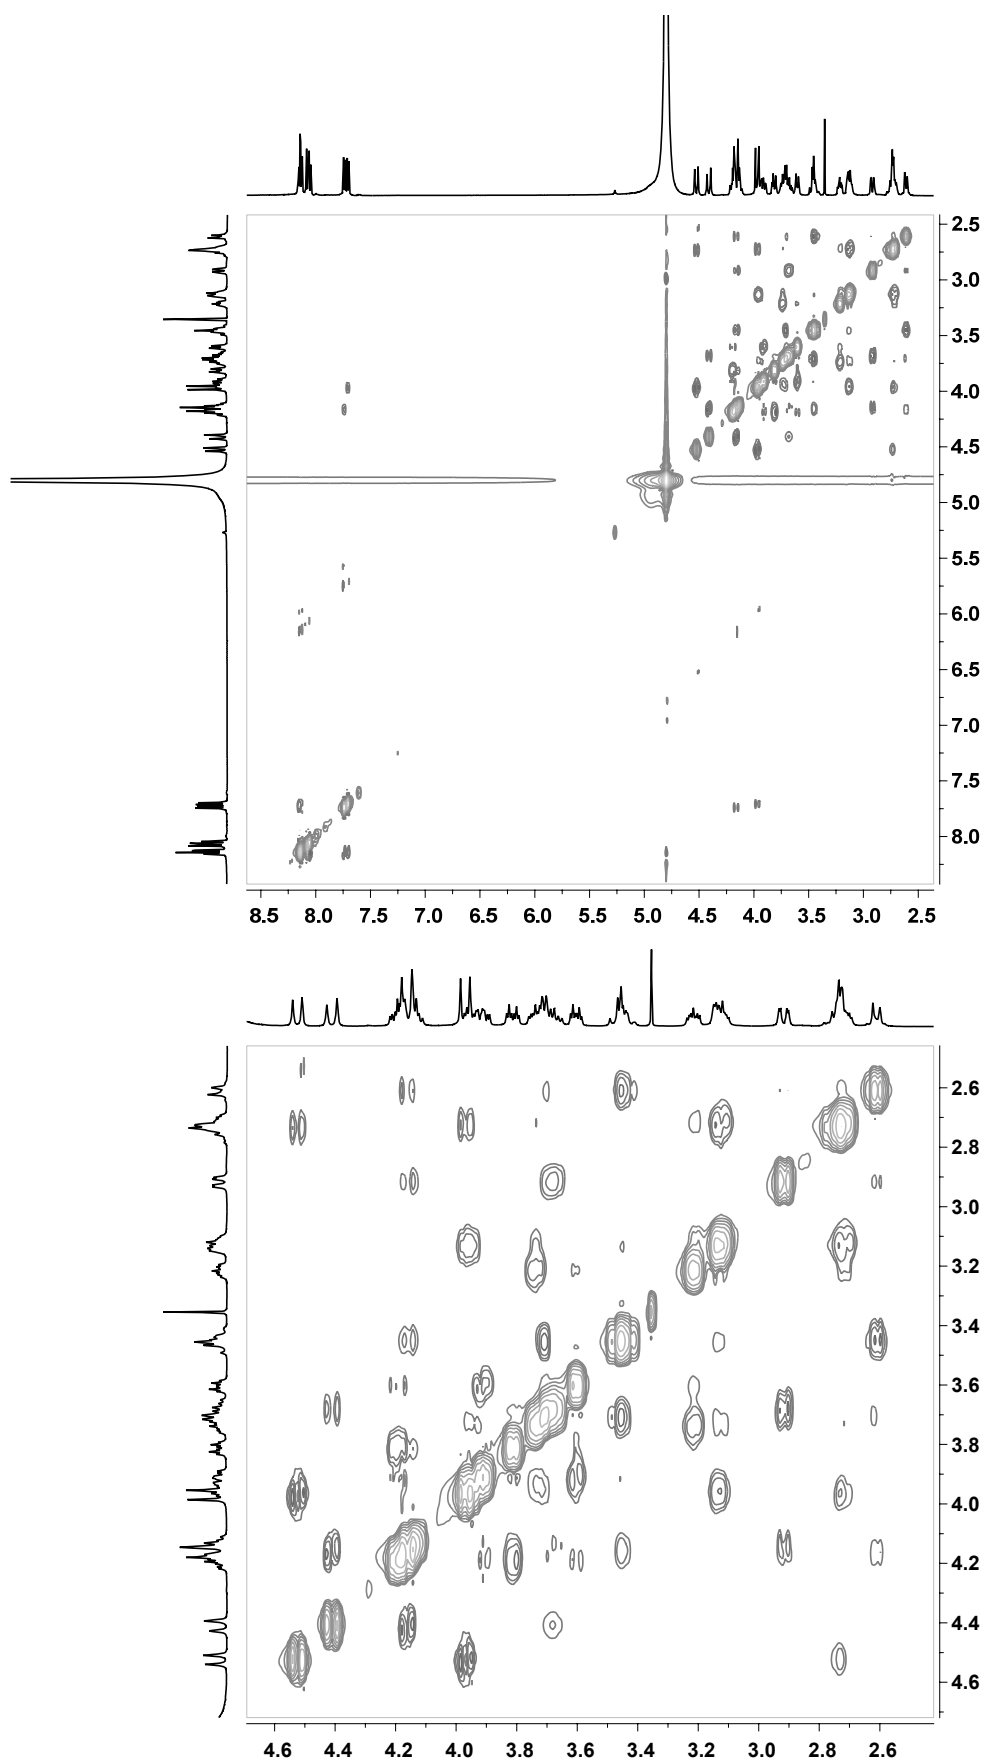

Figure S5.  $^1\text{H}$ - $^1\text{H}$ -NOESY NMR spectrum of  $[\text{La}(\text{bp15c5})]^+$  recorded in  $\text{D}_2\text{O}$  solution (pD = 7.0) at 298 K.

Table S1.  $^1\text{H}$  Shifts (ppm with respect to TMS) of paramagnetic  $[\text{Ln}(\text{bp}15\text{c}5)]^+$  complexes (Ln = Ce, Eu or Yb) recorded in  $\text{D}_2\text{O}$  solution (pD = 7.0) at 298 K.

|    | <b>Ce</b> | <b>Yb</b> | <b>Eu</b> |
|----|-----------|-----------|-----------|
| 1  | 16.04     | 70.01     | 18.97     |
| 2  | 14.07     | 44.78     | 14.98     |
| 3  | 13.93     | 42.23     | 13.80     |
| 4  | 13.64     | 40.76     | 12.10     |
| 5  | 12.02     | 32.65     | 8.82      |
| 6  | 11.6      | 27.79     | 8.35      |
| 7  | 10.76     | 19.95     | 7.83      |
| 8  | 10.6      | 19.82     | 7.70      |
| 9  | 10.32     | 19.07     | 6.95      |
| 10 | 10.24     | 19.05     | 3.47      |
| 11 | 9.76      | 13.9      | 2.78      |
| 12 | 9.17      | 8.43      | 2.60      |
| 13 | 8.4       | 7.68      | 1.91      |
| 14 | 4.15      | 3.89      | 1.81      |
| 15 | 3.91      | 3.69      | 1.63      |
| 16 | 3.8       | 3.69      | 0.42      |
| 17 | 3.7       | 3.1       | -1.05     |
| 18 | 2.96      | -1.34     | -1.32     |
| 19 | 1.91      | -1.68     | -1.70     |
| 20 | 0.72      | -5.85     | -1.79     |
| 21 | 0.34      | -6.62     | -1.79     |
| 22 | 0.04      | -7.52     | -3.48     |
| 23 | -0.25     | -9.38     | -4.68     |
| 24 | -1.51     | -9.44     | -7.77     |
| 25 | -1.67     | -9.48     | -10.31    |
| 26 | -2.73     | -27.24    | -14.80    |
| 27 | -4.09     | -27.24    | -15.17    |
| 28 | -4.74     | -29.65    | -15.68    |
| 29 | -6.82     | -39.8     | -16.10    |
| 30 | -8.07     | -42.76    | -18.37    |

[Ce(bp15c5)]<sup>+</sup> (vacuum)  $\Lambda(\lambda\delta)(\delta\lambda\lambda)$  (0 imaginary frequencies)

| Center Number | Atomic Number | Coordinates (Angstroms) |           |           |
|---------------|---------------|-------------------------|-----------|-----------|
|               |               | X                       | Y         | Z         |
| 1             | 64            | 0.060416                | -0.183494 | 0.019497  |
| 2             | 7             | 2.624915                | -1.463876 | -0.319193 |
| 3             | 7             | -1.732291               | -0.395851 | 2.099949  |
| 4             | 8             | 1.047560                | -1.243193 | 2.121443  |
| 5             | 8             | -1.855990               | -2.151749 | -0.117049 |
| 6             | 8             | 0.277132                | -2.498728 | -1.464841 |
| 7             | 6             | -2.558450               | -1.626519 | 2.079585  |
| 8             | 6             | -3.029057               | -2.001927 | 0.684721  |
| 9             | 6             | -2.107860               | -2.508145 | -1.482116 |
| 10            | 6             | -0.851981               | -3.181856 | -2.010440 |
| 11            | 6             | 1.524716                | -2.904086 | -2.028431 |
| 12            | 1             | 1.752633                | -2.273939 | -2.897111 |
| 13            | 1             | 1.466021                | -3.944944 | -2.371024 |
| 14            | 6             | 2.566521                | -2.813101 | -0.926090 |
| 15            | 1             | 2.287361                | -3.529795 | -0.149452 |
| 16            | 1             | 3.552817                | -3.117811 | -1.312041 |
| 17            | 6             | 3.196959                | -1.527321 | 1.048175  |
| 18            | 1             | 3.483889                | -0.515291 | 1.340903  |
| 19            | 1             | 4.108018                | -2.148127 | 1.069979  |
| 20            | 6             | 3.434535                | -0.573050 | -1.189326 |
| 21            | 1             | 3.049118                | -0.666135 | -2.210839 |
| 22            | 1             | 4.486183                | -0.901445 | -1.213991 |
| 23            | 6             | 2.227986                | -2.062522 | 2.097835  |
| 24            | 1             | 1.937939                | -3.106188 | 1.918772  |
| 25            | 1             | 2.721223                | -2.014046 | 3.076755  |
| 26            | 6             | 0.250207                | -1.387525 | 3.312178  |
| 27            | 1             | 0.882312                | -1.206302 | 4.190736  |
| 28            | 1             | -0.117186               | -2.420151 | 3.371960  |
| 29            | 6             | -0.869364               | -0.350258 | 3.310253  |
| 30            | 1             | -0.415199               | 0.642098  | 3.336720  |
| 31            | 1             | -1.456914               | -0.486639 | 4.232805  |
| 32            | 6             | 3.357724                | 0.877184  | -0.768051 |
| 33            | 6             | 4.400563                | 1.776829  | -0.994222 |
| 34            | 1             | 5.310643                | 1.446810  | -1.485823 |
| 35            | 6             | 4.251438                | 3.099854  | -0.573138 |
| 36            | 1             | 5.045019                | 3.820460  | -0.747466 |
| 37            | 6             | 3.089346                | 3.473966  | 0.099479  |
| 38            | 1             | 2.927515                | 4.474159  | 0.484621  |
| 39            | 6             | 2.102869                | 2.511515  | 0.300204  |
| 40            | 6             | 0.845242                | 2.799610  | 1.104180  |
| 41            | 7             | 2.226023                | 1.250644  | -0.153638 |
| 42            | 6             | -2.588509               | 0.823370  | 2.039509  |
| 43            | 1             | -1.983042               | 1.659945  | 2.398251  |
| 44            | 1             | -3.458714               | 0.717865  | 2.704267  |
| 45            | 6             | -3.032711               | 1.196056  | 0.637330  |
| 46            | 6             | -4.216335               | 1.894464  | 0.386801  |
| 47            | 1             | -4.902507               | 2.117270  | 1.198132  |
| 48            | 6             | -4.491035               | 2.312085  | -0.918054 |
| 49            | 1             | -5.403959               | 2.860439  | -1.131476 |
| 50            | 6             | -3.584204               | 2.026640  | -1.938788 |
| 51            | 1             | -3.739771               | 2.333458  | -2.966712 |
| 52            | 6             | -2.427929               | 1.321554  | -1.612374 |
| 53            | 6             | -1.356466               | 0.979590  | -2.646939 |
| 54            | 7             | -2.178052               | 0.911059  | -0.356768 |
| 55            | 8             | -0.294243               | 0.414186  | -2.124511 |
| 56            | 8             | -1.555798               | 1.227576  | -3.822983 |



|    |   |           |           |           |
|----|---|-----------|-----------|-----------|
| 57 | 8 | 0.666818  | 3.909720  | 1.577885  |
| 58 | 8 | 0.067159  | 1.757418  | 1.226912  |
| 59 | 1 | -0.811351 | -4.234105 | -1.697367 |
| 60 | 1 | -0.843728 | -3.136331 | -3.106703 |
| 61 | 1 | -2.352266 | -1.607773 | -2.056040 |
| 62 | 1 | -2.952478 | -3.205111 | -1.545727 |
| 63 | 1 | -1.956391 | -2.457578 | 2.454768  |
| 64 | 1 | -3.428659 | -1.526809 | 2.746889  |
| 65 | 1 | -3.694466 | -1.248221 | 0.250155  |
| 66 | 1 | -3.571186 | -2.956301 | 0.727268  |

-----  
 HF = -1714.1526672 Hartrees

Zero-point correction = 0.541662 Hartrees

Sum of electronic and thermal Enthalpies = -1713.577896 Hartrees

Sum of electronic and thermal Free Energies = -1713.672776 Hartrees

[Ce(bp15c5)]<sup>+</sup> (vacuum)  $\Lambda(\lambda\delta)(\delta\delta\lambda)$  (0 imaginary frequencies)

| Center<br>Number | Atomic<br>Number | Coordinates (Angstroms) |           |           |
|------------------|------------------|-------------------------|-----------|-----------|
|                  |                  | X                       | Y         | Z         |
| 1                | 64               | 0.057172                | -0.171541 | 0.033796  |
| 2                | 7                | 2.574971                | -1.557201 | -0.305684 |
| 3                | 7                | -1.707883               | -0.213785 | 2.125731  |
| 4                | 8                | 1.026150                | -1.183715 | 2.144982  |
| 5                | 8                | -2.006510               | -1.966345 | -0.061477 |
| 6                | 8                | 0.144850                | -2.677759 | -1.258604 |
| 7                | 6                | -2.566071               | -1.419469 | 2.189547  |
| 8                | 6                | -3.112527               | -1.845505 | 0.836120  |
| 9                | 6                | -2.196050               | -2.945141 | -1.088662 |
| 10               | 6                | -1.034382               | -2.827122 | -2.057082 |
| 11               | 6                | 1.358730                | -2.968783 | -1.948628 |
| 12               | 1                | 1.505580                | -2.254672 | -2.769973 |
| 13               | 1                | 1.313501                | -3.979166 | -2.377523 |
| 14               | 6                | 2.460168                | -2.907968 | -0.905945 |
| 15               | 1                | 2.209706                | -3.623849 | -0.118574 |
| 16               | 1                | 3.418086                | -3.228437 | -1.344290 |
| 17               | 6                | 3.145546                | -1.625022 | 1.062070  |
| 18               | 1                | 3.490095                | -0.624817 | 1.333873  |
| 19               | 1                | 4.020324                | -2.295259 | 1.096741  |
| 20               | 6                | 3.420946                | -0.715124 | -1.189173 |
| 21               | 1                | 3.038232                | -0.818580 | -2.210780 |
| 22               | 1                | 4.459571                | -1.083350 | -1.200909 |
| 23               | 6                | 2.149757                | -2.082098 | 2.124077  |
| 24               | 1                | 1.787831                | -3.104815 | 1.956402  |
| 25               | 1                | 2.650750                | -2.056033 | 3.099647  |
| 26               | 6                | 0.257633                | -1.211683 | 3.363732  |
| 27               | 1                | 0.921648                | -0.997142 | 4.210509  |
| 28               | 1                | -0.148676               | -2.221265 | 3.504947  |
| 29               | 6                | -0.821773               | -0.131289 | 3.318330  |
| 30               | 1                | -0.332394               | 0.843698  | 3.280090  |
| 31               | 1                | -1.397750               | -0.193053 | 4.256031  |
| 32               | 6                | 3.398300                | 0.746572  | -0.805966 |
| 33               | 6                | 4.478010                | 1.595925  | -1.054152 |
| 34               | 1                | 5.375988                | 1.213392  | -1.529714 |
| 35               | 6                | 4.381348                | 2.936636  | -0.676938 |
| 36               | 1                | 5.204357                | 3.618595  | -0.869316 |
| 37               | 6                | 3.231660                | 3.378342  | -0.024668 |
| 38               | 1                | 3.107706                | 4.396137  | 0.326957  |
| 39               | 6                | 2.206469                | 2.463133  | 0.201233  |

|    |   |           |           |           |
|----|---|-----------|-----------|-----------|
| 40 | 6 | 0.959583  | 2.829914  | 0.988249  |
| 41 | 7 | 2.279195  | 1.183441  | -0.209943 |
| 42 | 6 | -2.529664 | 1.026667  | 2.007032  |
| 43 | 1 | -1.898033 | 1.862376  | 2.318745  |
| 44 | 1 | -3.397839 | 0.980411  | 2.680868  |
| 45 | 6 | -2.975195 | 1.331852  | 0.588169  |
| 46 | 6 | -4.153192 | 2.025550  | 0.299843  |
| 47 | 1 | -4.832358 | 2.308076  | 1.098451  |
| 48 | 6 | -4.433308 | 2.357625  | -1.028229 |
| 49 | 1 | -5.341092 | 2.902159  | -1.271195 |
| 50 | 6 | -3.543244 | 1.985306  | -2.035958 |
| 51 | 1 | -3.710850 | 2.214403  | -3.082079 |
| 52 | 6 | -2.392158 | 1.290386  | -1.671145 |
| 53 | 6 | -1.355402 | 0.826491  | -2.691801 |
| 54 | 7 | -2.130735 | 0.977575  | -0.391162 |
| 55 | 8 | -0.295471 | 0.270824  | -2.147479 |
| 56 | 8 | -1.574616 | 0.968310  | -3.881750 |
| 57 | 8 | 0.825825  | 3.961209  | 1.425508  |
| 58 | 8 | 0.138495  | 1.825909  | 1.140893  |
| 59 | 1 | -1.967556 | -2.249371 | 2.572530  |
| 60 | 1 | -3.401847 | -1.269057 | 2.891404  |
| 61 | 1 | -3.843322 | -1.137915 | 0.428869  |
| 62 | 1 | -3.607513 | -2.818354 | 0.951728  |
| 63 | 1 | -0.972870 | -3.739142 | -2.664792 |
| 64 | 1 | -1.134455 | -1.960725 | -2.718582 |
| 65 | 1 | -2.222673 | -3.940562 | -0.625480 |
| 66 | 1 | -3.142878 | -2.773911 | -1.617058 |

-----  
 HF = -1714.1554533 Hartrees

Zero-point correction = 0.541864 Hartrees

Sum of electronic and thermal Enthalpies = -1713.580631 Hartrees

Sum of electronic and thermal Free Energies = -1713.674900 Hartrees

[Eu(bp15c5)]<sup>+</sup> (vacuum)  $\Lambda(\lambda\delta)(\delta\lambda\lambda)$  (0 imaginary frequencies)

| Center<br>Number | Atomic<br>Number | Coordinates (Angstroms) |           |           |
|------------------|------------------|-------------------------|-----------|-----------|
|                  |                  | X                       | Y         | Z         |
| 1                | 63               | 0.059678                | -0.179233 | 0.009026  |
| 2                | 7                | 2.630807                | -1.472993 | -0.314601 |
| 3                | 7                | -1.719014               | -0.359686 | 2.115758  |
| 4                | 8                | 1.061776                | -1.215707 | 2.131968  |
| 5                | 8                | -1.849647               | -2.168409 | -0.065910 |
| 6                | 8                | 0.273643                | -2.512519 | -1.447395 |
| 7                | 6                | -2.545115               | -1.590913 | 2.122088  |
| 8                | 6                | -3.019765               | -1.997550 | 0.737160  |
| 9                | 6                | -2.110569               | -2.550118 | -1.422982 |
| 10               | 6                | -0.856417               | -3.226287 | -1.950696 |
| 11               | 6                | 1.520484                | -2.925798 | -2.008418 |
| 12               | 1                | 1.748063                | -2.302877 | -2.882210 |
| 13               | 1                | 1.459344                | -3.968912 | -2.342885 |
| 14               | 6                | 2.565127                | -2.827696 | -0.908780 |
| 15               | 1                | 2.285208                | -3.535796 | -0.124478 |
| 16               | 1                | 3.549311                | -3.140148 | -1.294168 |
| 17               | 6                | 3.204812                | -1.525698 | 1.052618  |
| 18               | 1                | 3.498576                | -0.512330 | 1.333906  |
| 19               | 1                | 4.112353                | -2.151462 | 1.078843  |
| 20               | 6                | 3.443481                | -0.593519 | -1.193488 |
| 21               | 1                | 3.056588                | -0.693822 | -2.213883 |
| 22               | 1                | 4.493426                | -0.927432 | -1.217020 |

|    |   |           |           |           |
|----|---|-----------|-----------|-----------|
| 23 | 6 | 2.235898  | -2.043944 | 2.111036  |
| 24 | 1 | 1.937403  | -3.087048 | 1.942582  |
| 25 | 1 | 2.733827  | -1.990522 | 3.087359  |
| 26 | 6 | 0.271795  | -1.335933 | 3.329987  |
| 27 | 1 | 0.910025  | -1.141922 | 4.201419  |
| 28 | 1 | -0.099508 | -2.365745 | 3.410636  |
| 29 | 6 | -0.844151 | -0.294579 | 3.316896  |
| 30 | 1 | -0.386683 | 0.696860  | 3.320281  |
| 31 | 1 | -1.423604 | -0.410251 | 4.247371  |
| 32 | 6 | 3.375807  | 0.861186  | -0.784910 |
| 33 | 6 | 4.428316  | 1.748860  | -1.012925 |
| 34 | 1 | 5.338199  | 1.405845  | -1.495915 |
| 35 | 6 | 4.289371  | 3.077105  | -0.604651 |
| 36 | 1 | 5.090925  | 3.788451  | -0.780545 |
| 37 | 6 | 3.127038  | 3.468139  | 0.057415  |
| 38 | 1 | 2.972524  | 4.473061  | 0.433110  |
| 39 | 6 | 2.129447  | 2.517353  | 0.260414  |
| 40 | 6 | 0.870365  | 2.828333  | 1.054826  |
| 41 | 7 | 2.243334  | 1.251106  | -0.181113 |
| 42 | 6 | -2.575547 | 0.859112  | 2.045682  |
| 43 | 1 | -1.963410 | 1.701606  | 2.378693  |
| 44 | 1 | -3.434679 | 0.767029  | 2.726591  |
| 45 | 6 | -3.042718 | 1.205782  | 0.644282  |
| 46 | 6 | -4.232745 | 1.895054  | 0.399897  |
| 47 | 1 | -4.908050 | 2.128255  | 1.217414  |
| 48 | 6 | -4.528183 | 2.290229  | -0.907542 |
| 49 | 1 | -5.446401 | 2.831444  | -1.116415 |
| 50 | 6 | -3.635119 | 1.991708  | -1.936434 |
| 51 | 1 | -3.806527 | 2.281127  | -2.966878 |
| 52 | 6 | -2.471299 | 1.296085  | -1.615779 |
| 53 | 6 | -1.415061 | 0.941454  | -2.662068 |
| 54 | 7 | -2.201403 | 0.907301  | -0.357468 |
| 55 | 8 | -0.344126 | 0.384250  | -2.149105 |
| 56 | 8 | -1.633447 | 1.174294  | -3.837962 |
| 57 | 8 | 0.709471  | 3.942913  | 1.524568  |
| 58 | 8 | 0.072704  | 1.801131  | 1.174344  |
| 59 | 1 | -0.798747 | -4.267246 | -1.604349 |
| 60 | 1 | -0.867847 | -3.216053 | -3.047796 |
| 61 | 1 | -2.364017 | -1.660970 | -2.010342 |
| 62 | 1 | -2.951667 | -3.252915 | -1.467203 |
| 63 | 1 | -1.942577 | -2.413929 | 2.513709  |
| 64 | 1 | -3.413899 | -1.477360 | 2.788965  |
| 65 | 1 | -3.685242 | -1.253305 | 0.286944  |
| 66 | 1 | -3.563191 | -2.949846 | 0.803745  |

-----  
 HF = -1713.5622973Hartrees

Zero-point correction = 0.541609Hartrees

Sum of electronic and thermal Enthalpies = -1712.987573Hartrees

Sum of electronic and thermal Free Energies = -1713.082450Hartrees

[Eu(bp15c5)]<sup>+</sup> (vacuum)  $\Lambda(\lambda\delta)(\delta\delta\lambda)$

(0 imaginary frequencies)

| Center<br>Number | Atomic<br>Number | Coordinates (Angstroms) |           |           |
|------------------|------------------|-------------------------|-----------|-----------|
|                  |                  | X                       | Y         | Z         |
| 1                | 63               | 0.056997                | -0.169434 | 0.021560  |
| 2                | 7                | 2.585441                | -1.559510 | -0.304840 |
| 3                | 7                | -1.695544               | -0.194216 | 2.136509  |
| 4                | 8                | 1.042990                | -1.164923 | 2.150752  |
| 5                | 8                | -1.998692               | -1.978294 | -0.028464 |

|    |   |           |           |           |
|----|---|-----------|-----------|-----------|
| 6  | 8 | 0.149660  | -2.689728 | -1.236782 |
| 7  | 6 | -2.552429 | -1.400077 | 2.217266  |
| 8  | 6 | -3.102094 | -1.846078 | 0.871268  |
| 9  | 6 | -2.188632 | -2.971736 | -1.041653 |
| 10 | 6 | -1.036595 | -2.856181 | -2.022247 |
| 11 | 6 | 1.360430  | -2.984581 | -1.931371 |
| 12 | 1 | 1.502018  | -2.276972 | -2.759276 |
| 13 | 1 | 1.314103  | -3.998294 | -2.352080 |
| 14 | 6 | 2.468089  | -2.914419 | -0.895392 |
| 15 | 1 | 2.223219  | -3.625007 | -0.101484 |
| 16 | 1 | 3.423528  | -3.237269 | -1.337414 |
| 17 | 6 | 3.157796  | -1.617768 | 1.062778  |
| 18 | 1 | 3.503952  | -0.615931 | 1.326371  |
| 19 | 1 | 4.032057  | -2.288513 | 1.100826  |
| 20 | 6 | 3.430103  | -0.723292 | -1.195257 |
| 21 | 1 | 3.043990  | -0.831712 | -2.215224 |
| 22 | 1 | 4.468021  | -1.093460 | -1.208765 |
| 23 | 6 | 2.164223  | -2.065922 | 2.130974  |
| 24 | 1 | 1.799549  | -3.088892 | 1.970515  |
| 25 | 1 | 2.669191  | -2.035563 | 3.104434  |
| 26 | 6 | 0.279169  | -1.181303 | 3.372184  |
| 27 | 1 | 0.946108  | -0.959478 | 4.214869  |
| 28 | 1 | -0.127638 | -2.189106 | 3.524480  |
| 29 | 6 | -0.799703 | -0.100346 | 3.321235  |
| 30 | 1 | -0.309672 | 0.873811  | 3.268792  |
| 31 | 1 | -1.368725 | -0.150431 | 4.263907  |
| 32 | 6 | 3.412190  | 0.740809  | -0.819498 |
| 33 | 6 | 4.496817  | 1.583618  | -1.068059 |
| 34 | 1 | 5.394712  | 1.194434  | -1.538343 |
| 35 | 6 | 4.405232  | 2.926773  | -0.697951 |
| 36 | 1 | 5.232241  | 3.603756  | -0.890778 |
| 37 | 6 | 3.255477  | 3.377280  | -0.052110 |
| 38 | 1 | 3.135284  | 4.397351  | 0.294156  |
| 39 | 6 | 2.224500  | 2.468513  | 0.174600  |
| 40 | 6 | 0.977025  | 2.848462  | 0.955783  |
| 41 | 7 | 2.292712  | 1.186392  | -0.229936 |
| 42 | 6 | -2.518039 | 1.045437  | 2.014301  |
| 43 | 1 | -1.880203 | 1.884138  | 2.305049  |
| 44 | 1 | -3.375450 | 1.009141  | 2.702430  |
| 45 | 6 | -2.985724 | 1.333329  | 0.598922  |
| 46 | 6 | -4.171518 | 2.017696  | 0.320702  |
| 47 | 1 | -4.840973 | 2.304219  | 1.126044  |
| 48 | 6 | -4.471905 | 2.335505  | -1.006497 |
| 49 | 1 | -5.385980 | 2.872779  | -1.241938 |
| 50 | 6 | -3.593973 | 1.958260  | -2.022885 |
| 51 | 1 | -3.777332 | 2.176445  | -3.068690 |
| 52 | 6 | -2.434177 | 1.272517  | -1.667927 |
| 53 | 6 | -1.410811 | 0.804488  | -2.700752 |
| 54 | 7 | -2.153168 | 0.973692  | -0.388789 |
| 55 | 8 | -0.341439 | 0.254643  | -2.168991 |
| 56 | 8 | -1.648194 | 0.939346  | -3.887978 |
| 57 | 8 | 0.853587  | 3.982474  | 1.389074  |
| 58 | 8 | 0.145291  | 1.853372  | 1.108301  |
| 59 | 1 | -1.952340 | -2.224103 | 2.610218  |
| 60 | 1 | -3.386982 | -1.241516 | 2.918803  |
| 61 | 1 | -3.834998 | -1.145486 | 0.456087  |
| 62 | 1 | -3.595127 | -2.817940 | 1.002411  |
| 63 | 1 | -0.974208 | -3.774133 | -2.620776 |
| 64 | 1 | -1.149271 | -1.997179 | -2.691387 |
| 65 | 1 | -2.203107 | -3.961348 | -0.565718 |
| 66 | 1 | -3.141160 | -2.814956 | -1.564208 |

-----  
HF = -1713.5650224 Hartrees  
Zero-point correction = 0.541760 Hartrees  
Sum of electronic and thermal Enthalpies = -1712.990283 Hartrees  
Sum of electronic and thermal Free Energies = -1713.084588 Hartrees

[Eu(bp15c5)]<sup>+</sup> (vacuum)  $\Lambda(\lambda\delta)(\lambda\delta\lambda)$  (0 imaginary frequencies)

| Center<br>Number | Atomic<br>Number | Coordinates (Angstroms) |           |           |
|------------------|------------------|-------------------------|-----------|-----------|
|                  |                  | X                       | Y         | Z         |
| 1                | 63               | 0.028627                | -0.133550 | -0.025957 |
| 2                | 7                | 2.626834                | -1.501134 | -0.335105 |
| 3                | 7                | -1.795738               | -0.210112 | 2.063605  |
| 4                | 8                | 0.923912                | -1.290390 | 2.062828  |
| 5                | 8                | -1.931018               | -2.135765 | -0.018512 |
| 6                | 8                | 0.254661                | -2.544874 | -1.381529 |
| 7                | 6                | -2.811277               | -1.296568 | 2.037801  |
| 8                | 1                | -3.105478               | -1.581289 | 3.059635  |
| 9                | 1                | -3.702302               | -0.898178 | 1.546799  |
| 10               | 6                | -2.406069               | -2.540779 | 1.265074  |
| 11               | 1                | -1.630929               | -3.135507 | 1.767489  |
| 12               | 1                | -3.292610               | -3.179540 | 1.155298  |
| 13               | 6                | -1.950998               | -3.200254 | -0.979506 |
| 14               | 1                | -2.964863               | -3.324236 | -1.380918 |
| 15               | 1                | -1.642753               | -4.134229 | -0.491513 |
| 16               | 6                | -0.961560               | -2.852908 | -2.070716 |
| 17               | 1                | -0.824238               | -3.717947 | -2.731037 |
| 18               | 1                | -1.273589               | -1.991691 | -2.670096 |
| 19               | 6                | 1.467286                | -2.819193 | -2.079893 |
| 20               | 1                | 1.629634                | -2.070558 | -2.866201 |
| 21               | 1                | 1.415835                | -3.808967 | -2.552433 |
| 22               | 6                | 2.551373                | -2.815129 | -1.015935 |
| 23               | 1                | 2.294462                | -3.581772 | -0.280508 |
| 24               | 1                | 3.522907                | -3.094461 | -1.451979 |
| 25               | 6                | 3.110378                | -1.633251 | 1.059481  |
| 26               | 1                | 3.415515                | -0.642695 | 1.405071  |
| 27               | 1                | 3.996074                | -2.288145 | 1.116717  |
| 28               | 6                | 3.512327                | -0.616735 | -1.130462 |
| 29               | 1                | 3.191442                | -0.686002 | -2.176439 |
| 30               | 1                | 4.554548                | -0.974064 | -1.097044 |
| 31               | 6                | 2.064302                | -2.169270 | 2.035557  |
| 32               | 1                | 1.729527                | -3.183373 | 1.782236  |
| 33               | 1                | 2.515418                | -2.202211 | 3.034902  |
| 34               | 6                | 0.107473                | -1.386873 | 3.248587  |
| 35               | 1                | 0.749287                | -1.278119 | 4.131860  |
| 36               | 1                | -0.356543               | -2.379982 | 3.290389  |
| 37               | 6                | -0.917089               | -0.254288 | 3.257803  |
| 38               | 1                | -0.374938               | 0.693490  | 3.288728  |
| 39               | 1                | -1.504555               | -0.343495 | 4.186587  |
| 40               | 6                | 3.454795                | 0.829578  | -0.699855 |
| 41               | 6                | 4.544633                | 1.687348  | -0.862179 |
| 42               | 1                | 5.468020                | 1.318670  | -1.298452 |
| 43               | 6                | 4.425635                | 3.015730  | -0.451416 |
| 44               | 1                | 5.256040                | 3.704060  | -0.577988 |
| 45               | 6                | 3.241360                | 3.434087  | 0.151952  |
| 46               | 1                | 3.095088                | 4.439226  | 0.530335  |
| 47               | 6                | 2.208899                | 2.510504  | 0.294693  |
| 48               | 6                | 0.930835                | 2.852857  | 1.038876  |
| 49               | 7                | 2.301591                | 1.243883  | -0.154084 |

|    |   |           |          |           |
|----|---|-----------|----------|-----------|
| 50 | 6 | -2.515988 | 1.098280 | 1.995860  |
| 51 | 1 | -1.804186 | 1.883026 | 2.260430  |
| 52 | 1 | -3.350335 | 1.122547 | 2.711588  |
| 53 | 6 | -3.006676 | 1.390995 | 0.591030  |
| 54 | 6 | -4.187594 | 2.086014 | 0.324621  |
| 55 | 1 | -4.840008 | 2.387852 | 1.138215  |
| 56 | 6 | -4.505484 | 2.396709 | -1.000775 |
| 57 | 1 | -5.417945 | 2.940720 | -1.226739 |
| 58 | 6 | -3.645107 | 2.006187 | -2.026017 |
| 59 | 1 | -3.838857 | 2.222562 | -3.070312 |
| 60 | 6 | -2.487014 | 1.310700 | -1.682812 |
| 61 | 6 | -1.471155 | 0.850252 | -2.725437 |
| 62 | 7 | -2.193589 | 1.010075 | -0.407614 |
| 63 | 8 | -0.391614 | 0.309274 | -2.202607 |
| 64 | 8 | -1.716205 | 0.987309 | -3.910451 |
| 65 | 8 | 0.772498  | 3.970887 | 1.500935  |
| 66 | 8 | 0.111942  | 1.840439 | 1.133718  |

-----  
 HF = -1713.5603708 Hartrees

Zero-point correction = 0.541496 Hartrees

Sum of electronic and thermal Enthalpies = -1712.985779 Hartrees

Sum of electronic and thermal Free Energies = -1713.080730 Hartrees

[Eu(bp15c5)]<sup>+</sup> (vacuum)  $\Lambda(\delta\delta)(\lambda\delta\lambda)$  (0 imaginary frequencies)

| Center<br>Number | Atomic<br>Number | Coordinates (Angstroms) |           |           |
|------------------|------------------|-------------------------|-----------|-----------|
|                  |                  | X                       | Y         | Z         |
| 1                | 63               | -0.037362               | -0.254828 | 0.047273  |
| 2                | 7                | -2.819948               | -1.205732 | 0.101560  |
| 3                | 7                | 1.984149                | -0.810466 | -1.819428 |
| 4                | 8                | -0.852614               | -1.406588 | -2.063087 |
| 5                | 8                | 1.675317                | -2.357226 | 0.562113  |
| 6                | 8                | -0.759967               | -2.401756 | 1.531190  |
| 7                | 6                | 3.002628                | -1.778192 | -1.333089 |
| 8                | 1                | 3.589620                | -2.184814 | -2.171000 |
| 9                | 1                | 3.695091                | -1.238152 | -0.684542 |
| 10               | 6                | 2.415706                | -2.917800 | -0.526242 |
| 11               | 1                | 1.755090                | -3.567833 | -1.118848 |
| 12               | 1                | 3.237066                | -3.535722 | -0.140364 |
| 13               | 6                | 1.404793                | -3.312792 | 1.595685  |
| 14               | 1                | 2.310178                | -3.488374 | 2.191116  |
| 15               | 1                | 1.088377                | -4.260323 | 1.138899  |
| 16               | 6                | 0.286034                | -2.757497 | 2.450687  |
| 17               | 1                | -0.060008               | -3.525115 | 3.151979  |
| 18               | 1                | 0.586960                | -1.864312 | 3.007082  |
| 19               | 6                | -2.093946               | -2.692548 | 1.944456  |
| 20               | 1                | -2.390996               | -2.021659 | 2.760595  |
| 21               | 1                | -2.156666               | -3.724179 | 2.314561  |
| 22               | 6                | -2.964831               | -2.546462 | 0.705888  |
| 23               | 1                | -2.637753               | -3.295015 | -0.020156 |
| 24               | 1                | -4.015021               | -2.768953 | 0.955261  |
| 25               | 6                | -3.195418               | -1.196242 | -1.332565 |
| 26               | 1                | -3.271303               | -0.152780 | -1.645140 |
| 27               | 1                | -4.184142               | -1.660655 | -1.492361 |
| 28               | 6                | -3.637294               | -0.236321 | 0.872275  |
| 29               | 1                | -3.439923               | -0.401103 | 1.936946  |
| 30               | 1                | -4.713339               | -0.423239 | 0.721105  |
| 31               | 6                | -2.194299               | -1.902114 | -2.251311 |
| 32               | 1                | -2.170447               | -2.983973 | -2.080543 |

|    |   |           |           |           |
|----|---|-----------|-----------|-----------|
| 33 | 1 | -2.508377 | -1.735732 | -3.286759 |
| 34 | 6 | -0.122253 | -0.931434 | -3.225827 |
| 35 | 6 | 1.345800  | -1.316661 | -3.064851 |
| 36 | 6 | -3.315109 | 1.200732  | 0.528885  |
| 37 | 6 | -4.233275 | 2.238151  | 0.706701  |
| 38 | 1 | -5.216192 | 2.034773  | 1.121031  |
| 39 | 6 | -3.866037 | 3.531924  | 0.332449  |
| 40 | 1 | -4.556835 | 4.357726  | 0.474763  |
| 41 | 6 | -2.624170 | 3.741656  | -0.267304 |
| 42 | 1 | -2.302502 | 4.710727  | -0.631322 |
| 43 | 6 | -1.779436 | 2.647581  | -0.431017 |
| 44 | 6 | -0.480035 | 2.727107  | -1.214240 |
| 45 | 7 | -2.101161 | 1.416944  | 0.008036  |
| 46 | 6 | 2.657243  | 0.505671  | -2.017364 |
| 47 | 1 | 1.952342  | 1.177868  | -2.511274 |
| 48 | 1 | 3.547251  | 0.391295  | -2.654816 |
| 49 | 6 | 3.037074  | 1.126846  | -0.684336 |
| 50 | 6 | 4.161986  | 1.934711  | -0.514075 |
| 51 | 1 | 4.833804  | 2.119894  | -1.346510 |
| 52 | 6 | 4.401602  | 2.504493  | 0.739843  |
| 53 | 1 | 5.269297  | 3.140304  | 0.889446  |
| 54 | 6 | 3.524971  | 2.248737  | 1.793418  |
| 55 | 1 | 3.663845  | 2.660363  | 2.786465  |
| 56 | 6 | 2.423037  | 1.431627  | 1.547415  |
| 57 | 6 | 1.387193  | 1.109512  | 2.621887  |
| 58 | 7 | 2.201496  | 0.887878  | 0.339832  |
| 59 | 8 | 0.344945  | 0.448365  | 2.163510  |
| 60 | 8 | 1.580374  | 1.458328  | 3.772061  |
| 61 | 8 | -0.079509 | 3.800235  | -1.635119 |
| 62 | 8 | 0.069039  | 1.553965  | -1.391858 |
| 63 | 1 | 1.401479  | -2.409235 | -3.049677 |
| 64 | 1 | 1.897444  | -0.978494 | -3.955060 |
| 65 | 1 | -0.516269 | -1.417033 | -4.124830 |
| 66 | 1 | -0.258467 | 0.150832  | -3.298925 |

-----  
 HF = -1713.5551936 Hartrees

Zero-point correction = 0.541385 Hartrees

Sum of electronic and thermal Enthalpies = -1712.980729 Hartrees

Sum of electronic and thermal Free Energies = -1713.075637 Hartrees

[Eu(bp15c5)]<sup>+</sup> (vacuum)  $\Lambda(\lambda\delta)(\delta\delta\delta)$  (0 imaginary frequencies)

| Center<br>Number | Atomic<br>Number | Coordinates (Angstroms) |           |           |
|------------------|------------------|-------------------------|-----------|-----------|
|                  |                  | X                       | Y         | Z         |
| 1                | 63               | 0.057062                | -0.102077 | -0.054525 |
| 2                | 7                | 2.629002                | -1.504684 | -0.482418 |
| 3                | 7                | -1.627768               | -0.501753 | 2.101478  |
| 4                | 8                | 1.118137                | -1.385995 | 1.976752  |
| 5                | 8                | -1.798549               | -2.070119 | -0.263198 |
| 6                | 8                | 0.332322                | -2.181149 | -1.799126 |
| 7                | 6                | -2.404368               | -1.761687 | 2.031468  |
| 8                | 6                | -2.913311               | -2.098175 | 0.637560  |
| 9                | 6                | -1.968287               | -2.896434 | -1.423821 |
| 10               | 6                | -0.907893               | -2.486056 | -2.442054 |
| 11               | 6                | 1.052965                | -3.284108 | -1.249844 |
| 12               | 6                | 2.503515                | -2.833137 | -1.140975 |
| 13               | 6                | 3.245467                | -1.606050 | 0.856564  |
| 14               | 1                | 3.526409                | -0.602586 | 1.182613  |
| 15               | 1                | 4.164209                | -2.215985 | 0.834461  |

|    |   |           |           |           |
|----|---|-----------|-----------|-----------|
| 16 | 6 | 3.379272  | -0.571290 | -1.364512 |
| 17 | 1 | 2.885971  | -0.592897 | -2.343153 |
| 18 | 1 | 4.416832  | -0.909371 | -1.514794 |
| 19 | 6 | 2.306286  | -2.191791 | 1.901984  |
| 20 | 1 | 2.026966  | -3.231489 | 1.681547  |
| 21 | 1 | 2.814059  | -2.180433 | 2.874415  |
| 22 | 6 | 0.396679  | -1.530466 | 3.212413  |
| 23 | 6 | -0.721083 | -0.496238 | 3.280151  |
| 24 | 6 | 3.378600  | 0.850213  | -0.845317 |
| 25 | 6 | 4.459120  | 1.713154  | -1.030542 |
| 26 | 1 | 5.345323  | 1.373519  | -1.557685 |
| 27 | 6 | 4.380106  | 3.012491  | -0.523151 |
| 28 | 1 | 5.205187  | 3.704189  | -0.665519 |
| 29 | 6 | 3.248531  | 3.397327  | 0.192703  |
| 30 | 1 | 3.141781  | 4.376785  | 0.644505  |
| 31 | 6 | 2.217552  | 2.472795  | 0.348364  |
| 32 | 6 | 0.987433  | 2.775764  | 1.193373  |
| 33 | 7 | 2.273883  | 1.240161  | -0.188612 |
| 34 | 6 | -2.522674 | 0.688868  | 2.168820  |
| 35 | 1 | -1.915313 | 1.522914  | 2.532596  |
| 36 | 1 | -3.338129 | 0.519579  | 2.887634  |
| 37 | 6 | -3.073803 | 1.117637  | 0.824709  |
| 38 | 6 | -4.315848 | 1.739667  | 0.679805  |
| 39 | 1 | -4.972680 | 1.858834  | 1.536049  |
| 40 | 6 | -4.687819 | 2.216886  | -0.579965 |
| 41 | 1 | -5.647232 | 2.708222  | -0.713227 |
| 42 | 6 | -3.818345 | 2.060965  | -1.658898 |
| 43 | 1 | -4.049526 | 2.415458  | -2.656874 |
| 44 | 6 | -2.599735 | 1.423069  | -1.435328 |
| 45 | 6 | -1.574609 | 1.204985  | -2.544013 |
| 46 | 7 | -2.252432 | 0.959611  | -0.223352 |
| 47 | 8 | -0.456520 | 0.668110  | -2.116585 |
| 48 | 8 | -1.854336 | 1.504091  | -3.691692 |
| 49 | 8 | 0.890634  | 3.855241  | 1.752675  |
| 50 | 8 | 0.142948  | 1.779491  | 1.251133  |
| 51 | 1 | 3.088107  | -3.594290 | -0.607690 |
| 52 | 1 | 2.915181  | -2.769575 | -2.152137 |
| 53 | 1 | 0.981639  | -4.156658 | -1.912546 |
| 54 | 1 | 0.634475  | -3.562572 | -0.271897 |
| 55 | 1 | -0.768320 | -3.280093 | -3.186881 |
| 56 | 1 | -1.182451 | -1.564308 | -2.955709 |
| 57 | 1 | -1.870635 | -3.948421 | -1.122488 |
| 58 | 1 | -2.966962 | -2.754195 | -1.855985 |
| 59 | 1 | -3.345310 | -3.106945 | 0.661289  |
| 60 | 1 | -3.683232 | -1.403621 | 0.284938  |
| 61 | 1 | -1.756062 | -2.582949 | 2.344635  |
| 62 | 1 | -3.256175 | -1.738482 | 2.729770  |
| 63 | 1 | -0.269081 | 0.497205  | 3.320799  |
| 64 | 1 | -1.276350 | -0.660531 | 4.218168  |
| 65 | 1 | 1.078499  | -1.347846 | 4.052991  |
| 66 | 1 | 0.035487  | -2.563635 | 3.298957  |

-----  
HF = -1713.5581161 Hartrees

Zero-point correction = 0.541708 Hartrees

Sum of electronic and thermal Enthalpies = -1712.983399 Hartrees

Sum of electronic and thermal Free Energies = -1713.077797 Hartrees



[Eu(bp15c5)]<sup>+</sup> (vacuum)  $\Lambda(\lambda\lambda)(\delta\delta\lambda)$  (0 imaginary frequencies)

| Center Number | Atomic Number | Coordinates (Angstroms) |           |           |
|---------------|---------------|-------------------------|-----------|-----------|
|               |               | X                       | Y         | Z         |
| 1             | 63            | -0.012280               | 0.166642  | -0.000417 |
| 2             | 7             | -2.438372               | 1.881194  | -0.020723 |
| 3             | 7             | 1.424407                | -0.617241 | 2.182559  |
| 4             | 8             | -1.266954               | 0.355422  | 2.214322  |
| 5             | 8             | 2.002727                | 1.792613  | 0.837126  |
| 6             | 8             | 0.153908                | 2.865061  | -0.557034 |
| 7             | 6             | 2.136219                | 0.504135  | 2.835908  |
| 8             | 6             | 2.910625                | 1.372540  | 1.857145  |
| 9             | 6             | 2.388288                | 3.003984  | 0.175834  |
| 10            | 6             | 1.466385                | 3.193114  | -1.017319 |
| 11            | 6             | -0.926882               | 3.329443  | -1.369587 |
| 12            | 1             | -1.012647               | 2.707563  | -2.270217 |
| 13            | 1             | -0.746003               | 4.367108  | -1.679387 |
| 14            | 6             | -2.150588               | 3.273883  | -0.472406 |
| 15            | 1             | -1.937978               | 3.891886  | 0.402717  |
| 16            | 1             | -3.019390               | 3.716625  | -0.980695 |
| 17            | 6             | -2.963135               | 1.877359  | 1.369983  |
| 18            | 6             | -3.375198               | 1.280779  | -1.000587 |
| 19            | 1             | -3.013697               | 1.553758  | -1.999749 |
| 20            | 1             | -4.377891               | 1.726089  | -0.896849 |
| 21            | 6             | -2.685129               | 0.623671  | 2.196463  |
| 22            | 6             | -0.767878               | -0.272359 | 3.416013  |
| 23            | 1             | -1.557252               | -0.883195 | 3.868147  |
| 24            | 1             | -0.506205               | 0.518274  | 4.129144  |
| 25            | 6             | 0.403402                | -1.202189 | 3.093511  |
| 26            | 1             | 0.013892                | -2.087138 | 2.589209  |
| 27            | 1             | 0.852174                | -1.518264 | 4.049612  |
| 28            | 6             | -3.476131               | -0.224585 | -0.951036 |
| 29            | 6             | -4.659700               | -0.882072 | -1.292678 |
| 30            | 1             | -5.545749               | -0.309317 | -1.549003 |
| 31            | 6             | -4.680078               | -2.277578 | -1.303426 |
| 32            | 1             | -5.586547               | -2.810094 | -1.575875 |
| 33            | 6             | -3.529083               | -2.972261 | -0.940005 |
| 34            | 1             | -3.479680               | -4.054291 | -0.900873 |
| 35            | 6             | -2.393974               | -2.242728 | -0.592000 |
| 36            | 6             | -1.137258               | -2.937939 | -0.092563 |
| 37            | 7             | -2.361473               | -0.895520 | -0.618250 |
| 38            | 6             | 2.369844                | -1.687951 | 1.746359  |
| 39            | 1             | 1.791651                | -2.613047 | 1.671502  |
| 40            | 1             | 3.152664                | -1.841489 | 2.503724  |
| 41            | 6             | 2.990076                | -1.472506 | 0.377378  |
| 42            | 6             | 4.226826                | -2.020095 | 0.025444  |
| 43            | 1             | 4.828163                | -2.537889 | 0.766561  |
| 44            | 6             | 4.663403                | -1.905937 | -1.296747 |
| 45            | 1             | 5.618611                | -2.330538 | -1.591530 |
| 46            | 6             | 3.863041                | -1.251300 | -2.233283 |
| 47            | 1             | 4.146317                | -1.141085 | -3.273742 |
| 48            | 6             | 2.647778                | -0.722446 | -1.804145 |
| 49            | 6             | 1.696014                | 0.009100  | -2.748848 |
| 50            | 7             | 2.241540                | -0.827929 | -0.527812 |
| 51            | 8             | 0.562931                | 0.360561  | -2.184460 |
| 52            | 8             | 2.041369                | 0.232593  | -3.895855 |
| 53            | 8             | -1.118765               | -4.155247 | -0.000321 |
| 54            | 8             | -0.184873               | -2.110747 | 0.235139  |
| 55            | 1             | 1.394770                | 1.141748  | 3.324987  |
| 56            | 1             | 2.821367                | 0.135631  | 3.616513  |

|    |   |           |           |           |
|----|---|-----------|-----------|-----------|
| 57 | 1 | 3.758547  | 0.845869  | 1.402816  |
| 58 | 1 | 3.299247  | 2.246975  | 2.395262  |
| 59 | 1 | -3.027727 | 0.824373  | 3.218361  |
| 60 | 1 | -3.205653 | -0.263835 | 1.825139  |
| 61 | 1 | -4.050514 | 2.059140  | 1.387992  |
| 62 | 1 | -2.489383 | 2.709746  | 1.896600  |
| 63 | 1 | 1.507466  | 4.238593  | -1.349159 |
| 64 | 1 | 1.736286  | 2.545490  | -1.857254 |
| 65 | 1 | 2.290801  | 3.836571  | 0.884959  |
| 66 | 1 | 3.431320  | 2.944353  | -0.160848 |

-----  
 HF = -1713.5567968 Hartrees

Zero-point correction = 0.541870 Hartrees

Sum of electronic and thermal Enthalpies = -1712.981906 Hartrees

Sum of electronic and thermal Free Energies = -1713.076534 Hartrees

[Eu(bp15c5)]<sup>+</sup> (vacuum)  $\Lambda(\delta\lambda)(\lambda\delta\lambda)$  (0 imaginary frequencies)

| Center<br>Number | Atomic<br>Number | Coordinates (Angstroms) |           |           |
|------------------|------------------|-------------------------|-----------|-----------|
|                  |                  | X                       | Y         | Z         |
| 1                | 63               | -0.010470               | -0.263395 | -0.045362 |
| 2                | 7                | 2.757275                | -1.502981 | -0.077639 |
| 3                | 7                | -1.869053               | -0.431917 | 2.031322  |
| 4                | 8                | 1.039400                | -0.856624 | 2.250234  |
| 5                | 8                | -1.771518               | -2.356512 | -0.055552 |
| 6                | 8                | 0.490335                | -2.561149 | -1.340653 |
| 7                | 6                | -2.917947               | -1.467322 | 1.830412  |
| 8                | 1                | -3.409921               | -1.717297 | 2.782808  |
| 9                | 1                | -3.680029               | -1.047824 | 1.170661  |
| 10               | 6                | -2.395635               | -2.730491 | 1.176966  |
| 11               | 1                | -1.671792               | -3.272763 | 1.802652  |
| 12               | 1                | -3.240863               | -3.402449 | 0.980166  |
| 13               | 6                | -1.652296               | -3.444227 | -0.982376 |
| 14               | 6                | -0.667878               | -3.019938 | -2.052629 |
| 15               | 6                | 1.767876                | -2.888347 | -1.887347 |
| 16               | 1                | 2.018833                | -2.194127 | -2.699360 |
| 17               | 1                | 1.750357                | -3.904087 | -2.302157 |
| 18               | 6                | 2.742501                | -2.840604 | -0.722182 |
| 19               | 1                | 2.405807                | -3.576215 | 0.012455  |
| 20               | 1                | 3.747138                | -3.144136 | -1.057270 |
| 21               | 6                | 3.164984                | -1.598137 | 1.350278  |
| 22               | 6                | 3.644662                | -0.625604 | -0.875634 |
| 23               | 1                | 3.451466                | -0.831759 | -1.934579 |
| 24               | 1                | 4.701771                | -0.884417 | -0.699718 |
| 25               | 6                | 2.464461                | -0.641203 | 2.313067  |
| 26               | 6                | 0.307520                | -0.186117 | 3.304471  |
| 27               | 6                | -1.128405               | -0.694132 | 3.294006  |
| 28               | 6                | 3.438837                | 0.852580  | -0.647799 |
| 29               | 6                | 4.469562                | 1.769893  | -0.869492 |
| 30               | 1                | 5.448427                | 1.422660  | -1.186329 |
| 31               | 6                | 4.219452                | 3.128270  | -0.675609 |
| 32               | 1                | 5.001055                | 3.860499  | -0.855469 |
| 33               | 6                | 2.966004                | 3.524674  | -0.212567 |
| 34               | 1                | 2.716109                | 4.557041  | 0.003573  |
| 35               | 6                | 2.003982                | 2.544142  | 0.013014  |
| 36               | 6                | 0.676308                | 2.872152  | 0.672229  |
| 37               | 7                | 2.221004                | 1.238134  | -0.242217 |
| 38               | 6                | -2.536182               | 0.901513  | 2.035374  |
| 39               | 1                | -1.802366               | 1.650403  | 2.341326  |

|    |   |           |           |           |
|----|---|-----------|-----------|-----------|
| 40 | 1 | -3.371135 | 0.911474  | 2.752408  |
| 41 | 6 | -3.021992 | 1.274010  | 0.646036  |
| 42 | 6 | -4.156379 | 2.054537  | 0.420692  |
| 43 | 1 | -4.768204 | 2.385101  | 1.254391  |
| 44 | 6 | -4.481335 | 2.411255  | -0.891371 |
| 45 | 1 | -5.358263 | 3.021626  | -1.086136 |
| 46 | 6 | -3.671867 | 1.983798  | -1.942824 |
| 47 | 1 | -3.870812 | 2.236610  | -2.977915 |
| 48 | 6 | -2.555352 | 1.206961  | -1.638439 |
| 49 | 6 | -1.574858 | 0.730674  | -2.705990 |
| 50 | 7 | -2.260109 | 0.855530  | -0.377124 |
| 51 | 8 | -0.496613 | 0.161627  | -2.207973 |
| 52 | 8 | -1.835218 | 0.889813  | -3.884343 |
| 53 | 8 | 0.383377  | 4.030832  | 0.918302  |
| 54 | 8 | -0.019207 | 1.805501  | 0.961273  |
| 55 | 1 | -1.097438 | -1.777569 | 3.444746  |
| 56 | 1 | -1.659694 | -0.264102 | 4.156856  |
| 57 | 1 | 0.763295  | -0.440783 | 4.269463  |
| 58 | 1 | 0.367426  | 0.895381  | 3.147676  |
| 59 | 1 | 2.812049  | -0.872093 | 3.328578  |
| 60 | 1 | 2.681839  | 0.409821  | 2.103393  |
| 61 | 1 | 4.250828  | -1.452804 | 1.463294  |
| 62 | 1 | 2.944082  | -2.612629 | 1.693103  |
| 63 | 1 | -0.417320 | -3.877233 | -2.687502 |
| 64 | 1 | -1.049874 | -2.206837 | -2.677532 |
| 65 | 1 | -1.273444 | -4.330176 | -0.455479 |
| 66 | 1 | -2.634098 | -3.676710 | -1.414690 |

-----  
 HF = -1713.5548548 Hartrees

Zero-point correction = 0.541737Hartrees

Sum of electronic and thermal Enthalpies = -1712.980184 Hartrees

Sum of electronic and thermal Free Energies = -1713.074780 Hartrees

[Eu(bp15c5)]<sup>+</sup> (vacuum)  $\Lambda(\lambda\delta)(\lambda\lambda\lambda)$  (0 imaginary frequencies)

| Center<br>Number | Atomic<br>Number | Coordinates (Angstroms) |           |           |
|------------------|------------------|-------------------------|-----------|-----------|
|                  |                  | X                       | Y         | Z         |
| 1                | 63               | 0.036526                | -0.112932 | -0.017139 |
| 2                | 7                | 2.645473                | -1.427639 | -0.362998 |
| 3                | 7                | -1.777862               | -0.449782 | 2.050326  |
| 4                | 8                | 0.978574                | -1.381949 | 2.028376  |
| 5                | 8                | -1.965359               | -1.870573 | -0.328623 |
| 6                | 8                | 0.305302                | -2.579635 | -1.423525 |
| 7                | 6                | -2.688645               | -1.622141 | 1.905454  |
| 8                | 1                | -2.828849               | -2.131895 | 2.869283  |
| 9                | 1                | -3.668009               | -1.252758 | 1.590936  |
| 10               | 6                | -2.228818               | -2.627041 | 0.852543  |
| 11               | 1                | -1.331550               | -3.182702 | 1.158432  |
| 12               | 1                | -3.030245               | -3.354142 | 0.667327  |
| 13               | 6                | -2.059504               | -2.532588 | -1.592534 |
| 14               | 6                | -0.809327               | -3.350731 | -1.878303 |
| 15               | 6                | 1.552482                | -2.910188 | -2.042288 |
| 16               | 1                | 1.708261                | -2.253694 | -2.907382 |
| 17               | 1                | 1.540144                | -3.947037 | -2.399239 |
| 18               | 6                | 2.633433                | -2.771400 | -0.985426 |
| 19               | 1                | 2.430614                | -3.513017 | -0.209130 |
| 20               | 1                | 3.616817                | -3.018134 | -1.416777 |
| 21               | 6                | 3.179224                | -1.498088 | 1.018331  |
| 22               | 1                | 3.399876                | -0.481271 | 1.348720  |

|    |   |           |           |           |
|----|---|-----------|-----------|-----------|
| 23 | 1 | 4.122498  | -2.068710 | 1.054403  |
| 24 | 6 | 3.451046  | -0.510258 | -1.208079 |
| 25 | 1 | 3.069722  | -0.587041 | -2.233286 |
| 26 | 1 | 4.505711  | -0.829564 | -1.237122 |
| 27 | 6 | 2.211161  | -2.120665 | 2.021075  |
| 28 | 1 | 1.997487  | -3.176086 | 1.807542  |
| 29 | 1 | 2.669114  | -2.067236 | 3.016783  |
| 30 | 6 | 0.145481  | -1.617782 | 3.180351  |
| 31 | 1 | 0.761440  | -1.564304 | 4.086664  |
| 32 | 1 | -0.278786 | -2.629139 | 3.121029  |
| 33 | 6 | -0.922329 | -0.533763 | 3.258396  |
| 34 | 1 | -0.421365 | 0.431003  | 3.365398  |
| 35 | 1 | -1.522676 | -0.712849 | 4.165436  |
| 36 | 6 | 3.370057  | 0.931310  | -0.755953 |
| 37 | 6 | 4.415163  | 1.833741  | -0.959506 |
| 38 | 1 | 5.322948  | 1.514754  | -1.462504 |
| 39 | 6 | 4.272857  | 3.144454  | -0.499147 |
| 40 | 1 | 5.068230  | 3.866999  | -0.656465 |
| 41 | 6 | 3.117691  | 3.501587  | 0.194187  |
| 42 | 1 | 2.964170  | 4.488731  | 0.614764  |
| 43 | 6 | 2.128111  | 2.537513  | 0.370964  |
| 44 | 6 | 0.884195  | 2.802733  | 1.205963  |
| 45 | 7 | 2.241124  | 1.292186  | -0.128041 |
| 46 | 6 | -2.572221 | 0.816887  | 2.074689  |
| 47 | 1 | -1.905099 | 1.608691  | 2.424458  |
| 48 | 1 | -3.415315 | 0.735144  | 2.775390  |
| 49 | 6 | -3.058248 | 1.222615  | 0.696715  |
| 50 | 6 | -4.286297 | 1.847825  | 0.473154  |
| 51 | 1 | -4.977363 | 2.007387  | 1.295126  |
| 52 | 6 | -4.602158 | 2.273716  | -0.820813 |
| 53 | 1 | -5.549670 | 2.768612  | -1.012975 |
| 54 | 6 | -3.698082 | 2.054371  | -1.859209 |
| 55 | 1 | -3.892748 | 2.357025  | -2.881719 |
| 56 | 6 | -2.496931 | 1.412716  | -1.560351 |
| 57 | 6 | -1.450737 | 1.093352  | -2.627663 |
| 58 | 7 | -2.198982 | 1.018097  | -0.313313 |
| 59 | 8 | -0.371865 | 0.514036  | -2.146887 |
| 60 | 8 | -1.680763 | 1.355919  | -3.794316 |
| 61 | 8 | 0.721905  | 3.896117  | 1.721703  |
| 62 | 8 | 0.102570  | 1.760160  | 1.306377  |
| 63 | 1 | -0.815680 | -4.318072 | -1.356197 |
| 64 | 1 | -0.742760 | -3.540362 | -2.956643 |
| 65 | 1 | -2.155832 | -1.727836 | -2.323531 |
| 66 | 1 | -2.959056 | -3.159483 | -1.630883 |

-----  
 HF = -1713.5558054 Hartrees

Zero-point correction = 0.541232 Hartrees

Sum of electronic and thermal Enthalpies = -1712.981341 Hartrees

Sum of electronic and thermal Free Energies = -1713.076730 Hartrees

[Eu(bp15c5)]<sup>+</sup> (vacuum)  $\Lambda(\lambda\lambda)(\delta\delta\delta)$

(0 imaginary frequencies)

| Center<br>Number | Atomic<br>Number | Coordinates (Angstroms) |           |           |
|------------------|------------------|-------------------------|-----------|-----------|
|                  |                  | X                       | Y         | Z         |
| 1                | 63               | -0.009625               | 0.112339  | -0.147785 |
| 2                | 7                | -2.378638               | 1.922755  | -0.267284 |
| 3                | 7                | 1.273048                | -0.600612 | 2.208582  |
| 4                | 8                | -1.357196               | 0.414216  | 2.059821  |
| 5                | 8                | 1.858333                | 1.851505  | 0.906712  |

|    |   |           |           |           |
|----|---|-----------|-----------|-----------|
| 6  | 8 | 0.228463  | 2.724944  | -0.963903 |
| 7  | 6 | 1.908380  | 0.541551  | 2.901841  |
| 8  | 6 | 2.713687  | 1.437337  | 1.976694  |
| 9  | 6 | 2.313694  | 3.036657  | 0.238853  |
| 10 | 6 | 1.596719  | 3.105518  | -1.103584 |
| 11 | 6 | -0.654509 | 3.718116  | -0.449000 |
| 12 | 6 | -2.053298 | 3.264985  | -0.823447 |
| 13 | 6 | -2.843476 | 2.088084  | 1.131743  |
| 14 | 6 | -3.393984 | 1.282634  | -1.137396 |
| 15 | 1 | -3.086984 | 1.462546  | -2.174176 |
| 16 | 1 | -4.378745 | 1.760834  | -1.011405 |
| 17 | 6 | -2.723323 | 0.866821  | 2.033740  |
| 18 | 6 | -0.990728 | -0.256723 | 3.282547  |
| 19 | 6 | 0.193853  | -1.190335 | 3.042620  |
| 20 | 6 | -3.526423 | -0.213647 | -0.967286 |
| 21 | 6 | -4.747265 | -0.854856 | -1.188038 |
| 22 | 1 | -5.632688 | -0.271650 | -1.421967 |
| 23 | 6 | -4.806169 | -2.247039 | -1.110932 |
| 24 | 1 | -5.742574 | -2.766929 | -1.290751 |
| 25 | 6 | -3.652363 | -2.953029 | -0.781051 |
| 26 | 1 | -3.628584 | -4.031716 | -0.678334 |
| 27 | 6 | -2.477407 | -2.239106 | -0.552496 |
| 28 | 6 | -1.215113 | -2.948982 | -0.085561 |
| 29 | 7 | -2.409045 | -0.897213 | -0.665875 |
| 30 | 6 | 2.263643  | -1.663606 | 1.877043  |
| 31 | 1 | 1.703057  | -2.595766 | 1.759174  |
| 32 | 1 | 2.973000  | -1.803698 | 2.706285  |
| 33 | 6 | 3.004429  | -1.458287 | 0.570619  |
| 34 | 6 | 4.284445  | -1.974464 | 0.352627  |
| 35 | 1 | 4.829994  | -2.446918 | 1.163872  |
| 36 | 6 | 4.836442  | -1.891363 | -0.927981 |
| 37 | 1 | 5.828099  | -2.290880 | -1.119482 |
| 38 | 6 | 4.099979  | -1.305285 | -1.956779 |
| 39 | 1 | 4.466979  | -1.228395 | -2.973799 |
| 40 | 6 | 2.834823  | -0.804025 | -1.658114 |
| 41 | 6 | 1.940895  | -0.166874 | -2.719695 |
| 42 | 7 | 2.319280  | -0.866747 | -0.418375 |
| 43 | 8 | 0.755469  | 0.165102  | -2.267877 |
| 44 | 8 | 2.373684  | 0.001432  | -3.846310 |
| 45 | 8 | -1.236055 | -4.156948 | 0.088846  |
| 46 | 8 | -0.214227 | -2.142433 | 0.132505  |
| 47 | 1 | -2.794007 | 4.018358  | -0.513192 |
| 48 | 1 | -2.086221 | 3.199381  | -1.913179 |
| 49 | 1 | -0.449600 | 4.687755  | -0.921588 |
| 50 | 1 | -0.521739 | 3.835517  | 0.636378  |
| 51 | 1 | 1.676684  | 4.112272  | -1.532916 |
| 52 | 1 | 2.017319  | 2.393410  | -1.814553 |
| 53 | 1 | 2.094995  | 3.905862  | 0.874213  |
| 54 | 1 | 3.398316  | 2.994680  | 0.075667  |
| 55 | 1 | 3.051173  | 2.314028  | 2.544969  |
| 56 | 1 | 3.597244  | 0.935403  | 1.564773  |
| 57 | 1 | 1.120600  | 1.154597  | 3.346564  |
| 58 | 1 | 2.557032  | 0.194919  | 3.722829  |
| 59 | 1 | -0.157875 | -2.074968 | 2.510600  |
| 60 | 1 | 0.573426  | -1.510892 | 4.026953  |
| 61 | 1 | -1.830991 | -0.866769 | 3.634764  |
| 62 | 1 | -0.789373 | 0.506088  | 4.045093  |
| 63 | 1 | -3.023017 | 1.172393  | 3.043837  |
| 64 | 1 | -3.367380 | 0.039151  | 1.720279  |
| 65 | 1 | -3.892458 | 2.428926  | 1.154727  |
| 66 | 1 | -2.241180 | 2.880785  | 1.585328  |

-----  
HF = -1713.5542645 Hartrees  
Zero-point correction = 0.542009 Hartrees  
Sum of electronic and thermal Enthalpies = -1712.979248 Hartrees  
Sum of electronic and thermal Free Energies = -1713.074009 Hartrees

[Eu(bp15c5)]<sup>+</sup> (vacuum)  $\Lambda(\lambda\delta)(\delta\lambda\delta)$  (0 imaginary frequencies)

| Center<br>Number | Atomic<br>Number | Coordinates (Angstroms) |           |           |
|------------------|------------------|-------------------------|-----------|-----------|
|                  |                  | X                       | Y         | Z         |
| 1                | 63               | -0.045155               | 0.135949  | -0.063190 |
| 2                | 7                | -2.648308               | 1.419423  | -0.514839 |
| 3                | 7                | 1.676859                | 0.255287  | 2.104468  |
| 4                | 8                | -1.098663               | 1.163513  | 2.008106  |
| 5                | 8                | 1.887419                | 2.036163  | -0.033447 |
| 6                | 8                | -0.299346               | 2.858530  | -1.189439 |
| 7                | 6                | 2.531857                | 1.463979  | 2.162469  |
| 8                | 6                | 3.041636                | 1.892589  | 0.795409  |
| 9                | 6                | 2.058572                | 2.752688  | -1.265998 |
| 10               | 6                | 0.859740                | 3.668508  | -1.379302 |
| 11               | 6                | -1.477273               | 3.622183  | -0.966181 |
| 12               | 6                | -2.668843               | 2.720966  | -1.230826 |
| 13               | 6                | -3.212962               | 1.508976  | 0.857263  |
| 14               | 1                | -3.535796               | 0.507365  | 1.148839  |
| 15               | 1                | -4.105867               | 2.155985  | 0.872411  |
| 16               | 6                | -3.444787               | 0.466217  | -1.341164 |
| 17               | 1                | -3.022444               | 0.492449  | -2.352199 |
| 18               | 1                | -4.493610               | 0.793731  | -1.420705 |
| 19               | 6                | -2.262007               | 2.007242  | 1.946653  |
| 20               | 1                | -1.947097               | 3.047017  | 1.801838  |
| 21               | 1                | -2.795251               | 1.949975  | 2.904228  |
| 22               | 6                | -0.350421               | 1.257053  | 3.237804  |
| 23               | 1                | -1.026759               | 1.069177  | 4.081180  |
| 24               | 1                | 0.036415                | 2.279058  | 3.340095  |
| 25               | 6                | 0.749929                | 0.195693  | 3.264863  |
| 26               | 1                | 0.279325                | -0.789059 | 3.243555  |
| 27               | 1                | 1.287161                | 0.298899  | 4.221913  |
| 28               | 6                | -3.390385               | -0.955771 | -0.841012 |
| 29               | 6                | -4.460286               | -1.837988 | -1.001199 |
| 30               | 1                | -5.377310               | -1.502338 | -1.475596 |
| 31               | 6                | -4.327760               | -3.149769 | -0.541927 |
| 32               | 1                | -5.142156               | -3.857445 | -0.665884 |
| 33               | 6                | -3.151146               | -3.526509 | 0.101910  |
| 34               | 1                | -2.995161               | -4.516864 | 0.513931  |
| 35               | 6                | -2.138787               | -2.579373 | 0.239337  |
| 36               | 6                | -0.868267               | -2.875018 | 1.015348  |
| 37               | 7                | -2.245591               | -1.330090 | -0.250239 |
| 38               | 6                | 2.510676                | -0.979855 | 2.032647  |
| 39               | 1                | 1.874418                | -1.818675 | 2.324595  |
| 40               | 1                | 3.351389                | -0.919594 | 2.739488  |
| 41               | 6                | 3.016874                | -1.289377 | 0.634704  |
| 42               | 6                | 4.211958                | -1.973935 | 0.401861  |
| 43               | 1                | 4.857328                | -2.246371 | 1.231369  |
| 44               | 6                | 4.553483                | -2.310193 | -0.910950 |
| 45               | 1                | 5.475711                | -2.848114 | -1.110472 |
| 46               | 6                | 3.705234                | -1.951669 | -1.958601 |
| 47               | 1                | 3.918410                | -2.187395 | -2.994914 |
| 48               | 6                | 2.533871                | -1.263348 | -1.649311 |
| 49               | 6                | 1.531628                | -0.830530 | -2.719397 |

|    |   |           |           |           |
|----|---|-----------|-----------|-----------|
| 50 | 7 | 2.213940  | -0.944775 | -0.383754 |
| 51 | 8 | 0.456183  | -0.256894 | -2.225370 |
| 52 | 8 | 1.785975  | -1.023895 | -3.893958 |
| 53 | 8 | -0.703555 | -3.972490 | 1.523167  |
| 54 | 8 | -0.062202 | -1.850804 | 1.083031  |
| 55 | 1 | 0.904990  | 4.440756  | -0.597822 |
| 56 | 1 | 0.827717  | 4.158775  | -2.361747 |
| 57 | 1 | 2.098858  | 2.041255  | -2.097114 |
| 58 | 1 | 2.983955  | 3.338551  | -1.248608 |
| 59 | 1 | -3.599334 | 3.272486  | -1.020479 |
| 60 | 1 | -2.658511 | 2.501511  | -2.301186 |
| 61 | 1 | -1.463224 | 4.046660  | 0.047485  |
| 62 | 1 | -1.526709 | 4.464215  | -1.670803 |
| 63 | 1 | 3.554994  | 2.858453  | 0.890467  |
| 64 | 1 | 3.741029  | 1.172374  | 0.358310  |
| 65 | 1 | 3.382651  | 1.312872  | 2.844869  |
| 66 | 1 | 1.939679  | 2.291082  | 2.561330  |

-----  
 HF = -1713.5554981 Hartrees

Zero-point correction = 0.541530 Hartrees

Sum of electronic and thermal Enthalpies = -1712.980797 Hartrees

Sum of electronic and thermal Free Energies = -1713.076477 Hartrees

[Gd(bp15c5)]<sup>+</sup> (vacuum)  $\Lambda(\lambda\delta)(\delta\lambda\lambda)$  (0 imaginary frequencies)

| Center<br>Number | Atomic<br>Number | Coordinates (Angstroms) |           |           |
|------------------|------------------|-------------------------|-----------|-----------|
|                  |                  | X                       | Y         | Z         |
| 1                | 64               | 0.060416                | -0.183494 | 0.019497  |
| 2                | 7                | 2.624915                | -1.463876 | -0.319193 |
| 3                | 7                | -1.732291               | -0.395851 | 2.099949  |
| 4                | 8                | 1.047560                | -1.243193 | 2.121443  |
| 5                | 8                | -1.855990               | -2.151749 | -0.117049 |
| 6                | 8                | 0.277132                | -2.498728 | -1.464841 |
| 7                | 6                | -2.558450               | -1.626519 | 2.079585  |
| 8                | 6                | -3.029057               | -2.001927 | 0.684721  |
| 9                | 6                | -2.107860               | -2.508145 | -1.482116 |
| 10               | 6                | -0.851981               | -3.181856 | -2.010440 |
| 11               | 6                | 1.524716                | -2.904086 | -2.028431 |
| 12               | 1                | 1.752633                | -2.273939 | -2.897111 |
| 13               | 1                | 1.466021                | -3.944944 | -2.371024 |
| 14               | 6                | 2.566521                | -2.813101 | -0.926090 |
| 15               | 1                | 2.287361                | -3.529795 | -0.149452 |
| 16               | 1                | 3.552817                | -3.117811 | -1.312041 |
| 17               | 6                | 3.196959                | -1.527321 | 1.048175  |
| 18               | 1                | 3.483889                | -0.515291 | 1.340903  |
| 19               | 1                | 4.108018                | -2.148127 | 1.069979  |
| 20               | 6                | 3.434535                | -0.573050 | -1.189326 |
| 21               | 1                | 3.049118                | -0.666135 | -2.210839 |
| 22               | 1                | 4.486183                | -0.901445 | -1.213991 |
| 23               | 6                | 2.227986                | -2.062522 | 2.097835  |
| 24               | 1                | 1.937939                | -3.106188 | 1.918772  |
| 25               | 1                | 2.721223                | -2.014046 | 3.076755  |
| 26               | 6                | 0.250207                | -1.387525 | 3.312178  |
| 27               | 1                | 0.882312                | -1.206302 | 4.190736  |
| 28               | 1                | -0.117186               | -2.420151 | 3.371960  |
| 29               | 6                | -0.869364               | -0.350258 | 3.310253  |
| 30               | 1                | -0.415199               | 0.642098  | 3.336720  |
| 31               | 1                | -1.456914               | -0.486639 | 4.232805  |
| 32               | 6                | 3.357724                | 0.877184  | -0.768051 |

|    |   |           |           |           |
|----|---|-----------|-----------|-----------|
| 33 | 6 | 4.400563  | 1.776829  | -0.994222 |
| 34 | 1 | 5.310643  | 1.446810  | -1.485823 |
| 35 | 6 | 4.251438  | 3.099854  | -0.573138 |
| 36 | 1 | 5.045019  | 3.820460  | -0.747466 |
| 37 | 6 | 3.089346  | 3.473966  | 0.099479  |
| 38 | 1 | 2.927515  | 4.474159  | 0.484621  |
| 39 | 6 | 2.102869  | 2.511515  | 0.300204  |
| 40 | 6 | 0.845242  | 2.799610  | 1.104180  |
| 41 | 7 | 2.226023  | 1.250644  | -0.153638 |
| 42 | 6 | -2.588509 | 0.823370  | 2.039509  |
| 43 | 1 | -1.983042 | 1.659945  | 2.398251  |
| 44 | 1 | -3.458714 | 0.717865  | 2.704267  |
| 45 | 6 | -3.032711 | 1.196056  | 0.637330  |
| 46 | 6 | -4.216335 | 1.894464  | 0.386801  |
| 47 | 1 | -4.902507 | 2.117270  | 1.198132  |
| 48 | 6 | -4.491035 | 2.312085  | -0.918054 |
| 49 | 1 | -5.403959 | 2.860439  | -1.131476 |
| 50 | 6 | -3.584204 | 2.026640  | -1.938788 |
| 51 | 1 | -3.739771 | 2.333458  | -2.966712 |
| 52 | 6 | -2.427929 | 1.321554  | -1.612374 |
| 53 | 6 | -1.356466 | 0.979590  | -2.646939 |
| 54 | 7 | -2.178052 | 0.911059  | -0.356768 |
| 55 | 8 | -0.294243 | 0.414186  | -2.124511 |
| 56 | 8 | -1.555798 | 1.227576  | -3.822983 |
| 57 | 8 | 0.666818  | 3.909720  | 1.577885  |
| 58 | 8 | 0.067159  | 1.757418  | 1.226912  |
| 59 | 1 | -0.811351 | -4.234105 | -1.697367 |
| 60 | 1 | -0.843728 | -3.136331 | -3.106703 |
| 61 | 1 | -2.352266 | -1.607773 | -2.056040 |
| 62 | 1 | -2.952478 | -3.205111 | -1.545727 |
| 63 | 1 | -1.956391 | -2.457578 | 2.454768  |
| 64 | 1 | -3.428659 | -1.526809 | 2.746889  |
| 65 | 1 | -3.694466 | -1.248221 | 0.250155  |
| 66 | 1 | -3.571186 | -2.956301 | 0.727268  |

-----  
 HF = -1714.1526672 Hartrees

Zero-point correction = 0.541662 Hartrees

Sum of electronic and thermal Enthalpies = -1713.577896 Hartrees

Sum of electronic and thermal Free Energies = -1713.672776 Hartrees

[Gd(bp15c5)]<sup>+</sup> (vacuum)  $\Lambda(\lambda\delta)(\delta\delta\lambda)$  (0 imaginary frequencies)

| Center<br>Number | Atomic<br>Number | Coordinates (Angstroms) |           |           |
|------------------|------------------|-------------------------|-----------|-----------|
|                  |                  | X                       | Y         | Z         |
| 1                | 64               | 0.057172                | -0.171541 | 0.033796  |
| 2                | 7                | 2.574971                | -1.557201 | -0.305684 |
| 3                | 7                | -1.707883               | -0.213785 | 2.125731  |
| 4                | 8                | 1.026150                | -1.183715 | 2.144982  |
| 5                | 8                | -2.006510               | -1.966345 | -0.061477 |
| 6                | 8                | 0.144850                | -2.677759 | -1.258604 |
| 7                | 6                | -2.566071               | -1.419469 | 2.189547  |
| 8                | 6                | -3.112527               | -1.845505 | 0.836120  |
| 9                | 6                | -2.196050               | -2.945141 | -1.088662 |
| 10               | 6                | -1.034382               | -2.827122 | -2.057082 |
| 11               | 6                | 1.358730                | -2.968783 | -1.948628 |
| 12               | 1                | 1.505580                | -2.254672 | -2.769973 |
| 13               | 1                | 1.313501                | -3.979166 | -2.377523 |
| 14               | 6                | 2.460168                | -2.907968 | -0.905945 |
| 15               | 1                | 2.209706                | -3.623849 | -0.118574 |



|    |   |           |           |           |
|----|---|-----------|-----------|-----------|
| 16 | 1 | 3.418086  | -3.228437 | -1.344290 |
| 17 | 6 | 3.145546  | -1.625022 | 1.062070  |
| 18 | 1 | 3.490095  | -0.624817 | 1.333873  |
| 19 | 1 | 4.020324  | -2.295259 | 1.096741  |
| 20 | 6 | 3.420946  | -0.715124 | -1.189173 |
| 21 | 1 | 3.038232  | -0.818580 | -2.210780 |
| 22 | 1 | 4.459571  | -1.083350 | -1.200909 |
| 23 | 6 | 2.149757  | -2.082098 | 2.124077  |
| 24 | 1 | 1.787831  | -3.104815 | 1.956402  |
| 25 | 1 | 2.650750  | -2.056033 | 3.099647  |
| 26 | 6 | 0.257633  | -1.211683 | 3.363732  |
| 27 | 1 | 0.921648  | -0.997142 | 4.210509  |
| 28 | 1 | -0.148676 | -2.221265 | 3.504947  |
| 29 | 6 | -0.821773 | -0.131289 | 3.318330  |
| 30 | 1 | -0.332394 | 0.843698  | 3.280090  |
| 31 | 1 | -1.397750 | -0.193053 | 4.256031  |
| 32 | 6 | 3.398300  | 0.746572  | -0.805966 |
| 33 | 6 | 4.478010  | 1.595925  | -1.054152 |
| 34 | 1 | 5.375988  | 1.213392  | -1.529714 |
| 35 | 6 | 4.381348  | 2.936636  | -0.676938 |
| 36 | 1 | 5.204357  | 3.618595  | -0.869316 |
| 37 | 6 | 3.231660  | 3.378342  | -0.024668 |
| 38 | 1 | 3.107706  | 4.396137  | 0.326957  |
| 39 | 6 | 2.206469  | 2.463133  | 0.201233  |
| 40 | 6 | 0.959583  | 2.829914  | 0.988249  |
| 41 | 7 | 2.279195  | 1.183441  | -0.209943 |
| 42 | 6 | -2.529664 | 1.026667  | 2.007032  |
| 43 | 1 | -1.898033 | 1.862376  | 2.318745  |
| 44 | 1 | -3.397839 | 0.980411  | 2.680868  |
| 45 | 6 | -2.975195 | 1.331852  | 0.588169  |
| 46 | 6 | -4.153192 | 2.025550  | 0.299843  |
| 47 | 1 | -4.832358 | 2.308076  | 1.098451  |
| 48 | 6 | -4.433308 | 2.357625  | -1.028229 |
| 49 | 1 | -5.341092 | 2.902159  | -1.271195 |
| 50 | 6 | -3.543244 | 1.985306  | -2.035958 |
| 51 | 1 | -3.710850 | 2.214403  | -3.082079 |
| 52 | 6 | -2.392158 | 1.290386  | -1.671145 |
| 53 | 6 | -1.355402 | 0.826491  | -2.691801 |
| 54 | 7 | -2.130735 | 0.977575  | -0.391162 |
| 55 | 8 | -0.295471 | 0.270824  | -2.147479 |
| 56 | 8 | -1.574616 | 0.968310  | -3.881750 |
| 57 | 8 | 0.825825  | 3.961209  | 1.425508  |
| 58 | 8 | 0.138495  | 1.825909  | 1.140893  |
| 59 | 1 | -1.967556 | -2.249371 | 2.572530  |
| 60 | 1 | -3.401847 | -1.269057 | 2.891404  |
| 61 | 1 | -3.843322 | -1.137915 | 0.428869  |
| 62 | 1 | -3.607513 | -2.818354 | 0.951728  |
| 63 | 1 | -0.972870 | -3.739142 | -2.664792 |
| 64 | 1 | -1.134455 | -1.960725 | -2.718582 |
| 65 | 1 | -2.222673 | -3.940562 | -0.625480 |
| 66 | 1 | -3.142878 | -2.773911 | -1.617058 |

-----  
HF = -1714.1554533 Hartrees

Zero-point correction = 0.541864 Hartrees

Sum of electronic and thermal Enthalpies = -1713.580631 Hartrees

Sum of electronic and thermal Free Energies = -1713.674900 Hartrees

[Ho(bp15c5)]<sup>+</sup> (vacuum)  $\Lambda(\lambda\delta)(\delta\lambda\lambda)$  (0 imaginary frequencies)

---

| Center Number | Atomic Number | Coordinates (Angstroms) |           |           |
|---------------|---------------|-------------------------|-----------|-----------|
|               |               | X                       | Y         | Z         |
| 1             | 67            | 0.060718                | -0.181386 | 0.049603  |
| 2             | 7             | 2.572939                | -1.486520 | -0.316703 |
| 3             | 7             | -1.756034               | -0.383426 | 2.079264  |
| 4             | 8             | 0.998468                | -1.260576 | 2.109946  |
| 5             | 8             | -1.902592               | -2.092207 | -0.153159 |
| 6             | 8             | 0.224931                | -2.496085 | -1.459613 |
| 7             | 6             | -2.597033               | -1.603061 | 2.049043  |
| 8             | 6             | -3.073897               | -1.951598 | 0.650357  |
| 9             | 6             | -2.156483               | -2.428707 | -1.521882 |
| 10            | 6             | -0.912190               | -3.125349 | -2.048933 |
| 11            | 6             | 1.464564                | -2.914805 | -2.026799 |
| 12            | 1             | 1.699415                | -2.287330 | -2.895724 |
| 13            | 1             | 1.394079                | -3.955567 | -2.368583 |
| 14            | 6             | 2.505686                | -2.834852 | -0.924559 |
| 15            | 1             | 2.219995                | -3.550235 | -0.149180 |
| 16            | 1             | 3.490563                | -3.145516 | -1.309086 |
| 17            | 6             | 3.151288                | -1.558042 | 1.047287  |
| 18            | 1             | 3.450679                | -0.550285 | 1.341787  |
| 19            | 1             | 4.054975                | -2.189445 | 1.065246  |
| 20            | 6             | 3.383433                | -0.601637 | -1.191969 |
| 21            | 1             | 2.983166                | -0.683998 | -2.208423 |
| 22            | 1             | 4.431008                | -0.941371 | -1.229477 |
| 23            | 6             | 2.176647                | -2.085247 | 2.095055  |
| 24            | 1             | 1.881900                | -3.127825 | 1.918645  |
| 25            | 1             | 2.664135                | -2.034584 | 3.076541  |
| 26            | 6             | 0.199908                | -1.398008 | 3.302253  |
| 27            | 1             | 0.835472                | -1.224569 | 4.179628  |
| 28            | 1             | -0.176515               | -2.427408 | 3.359454  |
| 29            | 6             | -0.910573               | -0.351475 | 3.301197  |
| 30            | 1             | -0.450598               | 0.637205  | 3.342070  |
| 31            | 1             | -1.509929               | -0.493888 | 4.215135  |
| 32            | 6             | 3.323990                | 0.845268  | -0.761490 |
| 33            | 6             | 4.366089                | 1.743159  | -0.997886 |
| 34            | 1             | 5.266502                | 1.414025  | -1.507505 |
| 35            | 6             | 4.228749                | 3.063176  | -0.563706 |
| 36            | 1             | 5.022066                | 3.782272  | -0.745210 |
| 37            | 6             | 3.078619                | 3.436302  | 0.130082  |
| 38            | 1             | 2.926320                | 4.434267  | 0.524859  |
| 39            | 6             | 2.092739                | 2.475377  | 0.337821  |
| 40            | 6             | 0.844473                | 2.753491  | 1.155548  |
| 41            | 7             | 2.204549                | 1.217432  | -0.125821 |
| 42            | 6             | -2.598229               | 0.844587  | 2.003120  |
| 43            | 1             | -1.998853               | 1.672499  | 2.390269  |
| 44            | 1             | -3.491900               | 0.741372  | 2.636235  |
| 45            | 6             | -2.990423               | 1.231175  | 0.589226  |
| 46            | 6             | -4.153724               | 1.949019  | 0.301164  |
| 47            | 1             | -4.862299               | 2.181838  | 1.090159  |
| 48            | 6             | -4.379857               | 2.372309  | -1.011058 |
| 49            | 1             | -5.276642               | 2.935485  | -1.252398 |
| 50            | 6             | -3.445755               | 2.073176  | -2.002993 |
| 51            | 1             | -3.563620               | 2.382988  | -3.035042 |
| 52            | 6             | -2.312075               | 1.350038  | -1.640183 |
| 53            | 6             | -1.211625               | 0.989003  | -2.635654 |
| 54            | 7             | -2.108928               | 0.934354  | -0.377559 |
| 55            | 8             | -0.179052               | 0.406903  | -2.072196 |
| 56            | 8             | -1.361622               | 1.238284  | -3.818477 |

|    |   |           |           |           |
|----|---|-----------|-----------|-----------|
| 57 | 8 | 0.665187  | 3.855049  | 1.647897  |
| 58 | 8 | 0.069612  | 1.706761  | 1.266778  |
| 59 | 1 | -0.909998 | -4.187853 | -1.769266 |
| 60 | 1 | -0.879691 | -3.046405 | -3.142935 |
| 61 | 1 | -2.380139 | -1.517829 | -2.087676 |
| 62 | 1 | -3.016467 | -3.105553 | -1.596023 |
| 63 | 1 | -2.003125 | -2.445963 | 2.410734  |
| 64 | 1 | -3.463256 | -1.500881 | 2.721209  |
| 65 | 1 | -3.736930 | -1.186772 | 0.230912  |
| 66 | 1 | -3.621519 | -2.903489 | 0.676312  |

-----  
 HF = -1715.9147166 Hartrees

Zero-point correction = 0.541939 Hartrees

Sum of electronic and thermal Enthalpies = -1715.339728 Hartrees

Sum of electronic and thermal Free Energies = -1715.434522 Hartrees

-----  
 [Ho(bp15c5)]<sup>+</sup> (vacuum)  $\Lambda(\lambda\delta)(\delta\delta\lambda)$  (0 imaginary frequencies)

| Center<br>Number | Atomic<br>Number | Coordinates (Angstroms) |           |           |
|------------------|------------------|-------------------------|-----------|-----------|
|                  |                  | X                       | Y         | Z         |
| 1                | 67               | 0.056686                | -0.166384 | 0.064636  |
| 2                | 7                | 2.527231                | -1.574500 | -0.294208 |
| 3                | 7                | -1.735100               | -0.202408 | 2.102343  |
| 4                | 8                | 0.973146                | -1.196848 | 2.138042  |
| 5                | 8                | -2.042294               | -1.924824 | -0.096224 |
| 6                | 8                | 0.101719                | -2.673477 | -1.266066 |
| 7                | 6                | -2.607707               | -1.397686 | 2.154029  |
| 8                | 6                | -3.152279               | -1.800823 | 0.794107  |
| 9                | 6                | -2.243281               | -2.888061 | -1.134931 |
| 10               | 6                | -1.065127               | -2.791371 | -2.084319 |
| 11               | 6                | 1.316726                | -2.975601 | -1.946055 |
| 12               | 1                | 1.477551                | -2.262243 | -2.765117 |
| 13               | 1                | 1.265974                | -3.985589 | -2.375982 |
| 14               | 6                | 2.407995                | -2.925186 | -0.893719 |
| 15               | 1                | 2.143164                | -3.638163 | -0.108445 |
| 16               | 1                | 3.368263                | -3.253041 | -1.321217 |
| 17               | 6                | 3.098616                | -1.647626 | 1.072428  |
| 18               | 1                | 3.450520                | -0.650807 | 1.346750  |
| 19               | 1                | 3.967780                | -2.325012 | 1.107129  |
| 20               | 6                | 3.377955                | -0.739474 | -1.179406 |
| 21               | 1                | 2.990377                | -0.837167 | -2.199386 |
| 22               | 1                | 4.413517                | -1.116005 | -1.193596 |
| 23               | 6                | 2.095324                | -2.098800 | 2.128655  |
| 24               | 1                | 1.730759                | -3.120407 | 1.961591  |
| 25               | 1                | 2.587523                | -2.070260 | 3.108400  |
| 26               | 6                | 0.201962                | -1.219377 | 3.356607  |
| 27               | 1                | 0.867469                | -1.011156 | 4.203550  |
| 28               | 1                | -0.211222               | -2.226434 | 3.494724  |
| 29               | 6                | -0.869459               | -0.131991 | 3.309643  |
| 30               | 1                | -0.374969               | 0.840257  | 3.287486  |
| 31               | 1                | -1.459890               | -0.201150 | 4.237724  |
| 32               | 6                | 3.365238                | 0.720174  | -0.793346 |
| 33               | 6                | 4.442052                | 1.569803  | -1.053651 |
| 34               | 1                | 5.332681                | 1.188162  | -1.543502 |
| 35               | 6                | 4.351989                | 2.908986  | -0.670060 |
| 36               | 1                | 5.172844                | 3.590973  | -0.871233 |
| 37               | 6                | 3.211394                | 3.349366  | -0.000610 |
| 38               | 1                | 3.093010                | 4.366180  | 0.355789  |
| 39               | 6                | 2.189606                | 2.433598  | 0.235006  |

|    |   |           |           |           |
|----|---|-----------|-----------|-----------|
| 40 | 6 | 0.950403  | 2.790560  | 1.033965  |
| 41 | 7 | 2.255696  | 1.155144  | -0.180103 |
| 42 | 6 | -2.543462 | 1.044954  | 1.967284  |
| 43 | 1 | -1.919547 | 1.874072  | 2.309623  |
| 44 | 1 | -3.436252 | 0.998380  | 2.608007  |
| 45 | 6 | -2.934631 | 1.362904  | 0.535464  |
| 46 | 6 | -4.090036 | 2.077213  | 0.207939  |
| 47 | 1 | -4.790486 | 2.371443  | 0.983604  |
| 48 | 6 | -4.320433 | 2.413614  | -1.128471 |
| 49 | 1 | -5.210216 | 2.973551  | -1.401138 |
| 50 | 6 | -3.404295 | 2.025304  | -2.106627 |
| 51 | 1 | -3.533965 | 2.256210  | -3.157743 |
| 52 | 6 | -2.277963 | 1.312271  | -1.703378 |
| 53 | 6 | -1.213397 | 0.827154  | -2.682602 |
| 54 | 7 | -2.064407 | 0.995128  | -0.415569 |
| 55 | 8 | -0.182368 | 0.261827  | -2.093661 |
| 56 | 8 | -1.385265 | 0.960868  | -3.881085 |
| 57 | 8 | 0.810693  | 3.916132  | 1.482923  |
| 58 | 8 | 0.136595  | 1.778885  | 1.182673  |
| 59 | 1 | -2.020285 | -2.238545 | 2.530433  |
| 60 | 1 | -3.443504 | -1.243175 | 2.854943  |
| 61 | 1 | -3.871834 | -1.078904 | 0.391086  |
| 62 | 1 | -3.661288 | -2.768131 | 0.894942  |
| 63 | 1 | -1.014948 | -3.701947 | -2.695742 |
| 64 | 1 | -1.135723 | -1.921902 | -2.745547 |
| 65 | 1 | -2.301512 | -3.886851 | -0.681731 |
| 66 | 1 | -3.178665 | -2.688085 | -1.673768 |

-----  
 HF = -1715.9176441 Hartrees

Zero-point correction = 0.542234 Hartrees

Sum of electronic and thermal Enthalpies = -1715.342531 Hartrees

Sum of electronic and thermal Free Energies = -1715.436618 Hartrees

-----  
 [Ho(bp15c5)]<sup>+</sup> (vacuum)  $\Lambda(\lambda\delta)(\lambda\delta\lambda)$  (0 imaginary frequencies)

| Center<br>Number | Atomic<br>Number | Coordinates (Angstroms) |           |           |
|------------------|------------------|-------------------------|-----------|-----------|
|                  |                  | X                       | Y         | Z         |
| 1                | 67               | -0.032467               | -0.129311 | -0.017135 |
| 2                | 7                | -2.556319               | -1.544661 | 0.319857  |
| 3                | 7                | 1.845855                | -0.181368 | -2.030966 |
| 4                | 8                | -0.830540               | -1.324458 | -2.046008 |
| 5                | 8                | 2.009397                | -2.060671 | 0.070125  |
| 6                | 8                | -0.176388               | -2.542244 | 1.384664  |
| 7                | 6                | 2.890807                | -1.238781 | -1.984644 |
| 8                | 1                | 3.202310                | -1.526378 | -3.000326 |
| 9                | 1                | 3.766431                | -0.812379 | -1.489376 |
| 10               | 6                | 2.507418                | -2.479784 | -1.198868 |
| 11               | 1                | 1.751530                | -3.100239 | -1.699853 |
| 12               | 1                | 3.406932                | -3.096236 | -1.068729 |
| 13               | 6                | 2.062287                | -3.101241 | 1.054597  |
| 14               | 1                | 3.071939                | -3.165324 | 1.480154  |
| 15               | 1                | 1.812242                | -4.060167 | 0.582104  |
| 16               | 6                | 1.030377                | -2.781285 | 2.112746  |
| 17               | 1                | 0.914069                | -3.641349 | 2.784072  |
| 18               | 1                | 1.287769                | -1.899724 | 2.708573  |
| 19               | 6                | -1.387063               | -2.822273 | 2.081417  |
| 20               | 1                | -1.565055               | -2.061840 | 2.852451  |
| 21               | 1                | -1.323492               | -3.803264 | 2.571247  |
| 22               | 6                | -2.462152               | -2.852118 | 1.010952  |

|    |   |           |           |           |
|----|---|-----------|-----------|-----------|
| 23 | 1 | -2.183645 | -3.619799 | 0.284646  |
| 24 | 1 | -3.432354 | -3.145718 | 1.440076  |
| 25 | 6 | -3.027526 | -1.698481 | -1.076126 |
| 26 | 1 | -3.350090 | -0.718143 | -1.434769 |
| 27 | 1 | -3.898279 | -2.372851 | -1.135454 |
| 28 | 6 | -3.464786 | -0.675293 | 1.105175  |
| 29 | 1 | -3.150516 | -0.733696 | 2.153439  |
| 30 | 1 | -4.499857 | -1.051898 | 1.063512  |
| 31 | 6 | -1.958322 | -2.222354 | -2.032321 |
| 32 | 1 | -1.609528 | -3.228317 | -1.767314 |
| 33 | 1 | -2.390345 | -2.267478 | -3.039251 |
| 34 | 6 | -0.004798 | -1.409446 | -3.228708 |
| 35 | 1 | -0.646456 | -1.323147 | -4.114208 |
| 36 | 1 | 0.480784  | -2.392463 | -3.258121 |
| 37 | 6 | 0.994577  | -0.255331 | -3.241930 |
| 38 | 1 | 0.434965  | 0.680368  | -3.296567 |
| 39 | 1 | 1.600491  | -0.349089 | -4.158296 |
| 40 | 6 | -3.426708 | 0.768355  | 0.669250  |
| 41 | 6 | -4.519326 | 1.620915  | 0.842492  |
| 42 | 1 | -5.433630 | 1.249367  | 1.295137  |
| 43 | 6 | -4.414798 | 2.946884  | 0.421112  |
| 44 | 1 | -5.247412 | 3.631015  | 0.555472  |
| 45 | 6 | -3.241966 | 3.368502  | -0.203068 |
| 46 | 1 | -3.107912 | 4.371993  | -0.590345 |
| 47 | 6 | -2.207726 | 2.449418  | -0.354040 |
| 48 | 6 | -0.940729 | 2.781500  | -1.115327 |
| 49 | 7 | -2.285461 | 1.185384  | 0.103854  |
| 50 | 6 | 2.529201  | 1.144464  | -1.941743 |
| 51 | 1 | 1.815193  | 1.910982  | -2.248417 |
| 52 | 1 | 3.398174  | 1.183934  | -2.613887 |
| 53 | 6 | 2.940836  | 1.454677  | -0.515646 |
| 54 | 6 | 4.089077  | 2.179508  | -0.191831 |
| 55 | 1 | 4.773343  | 2.496307  | -0.972915 |
| 56 | 6 | 4.333850  | 2.499343  | 1.146735  |
| 57 | 1 | 5.220583  | 3.065657  | 1.416101  |
| 58 | 6 | 3.433537  | 2.089163  | 2.129293  |
| 59 | 1 | 3.570257  | 2.311218  | 3.181405  |
| 60 | 6 | 2.311400  | 1.366189  | 1.730023  |
| 61 | 6 | 1.253442  | 0.879738  | 2.715008  |
| 62 | 7 | 2.088795  | 1.055352  | 0.442830  |
| 63 | 8 | 0.215539  | 0.320667  | 2.129859  |
| 64 | 8 | 1.430140  | 1.011366  | 3.912587  |
| 65 | 8 | -0.776284 | 3.891957  | -1.592076 |
| 66 | 8 | -0.130451 | 1.760375  | -1.207752 |

-----  
 HF = -1715.9122743 Hartrees

Zero-point correction = 0.541940 Hartrees

Sum of electronic and thermal Enthalpies = -1715.337311 Hartrees

Sum of electronic and thermal Free Energies = -1715.432186 Hartrees

-----  
 [Ho(bp15c5)]<sup>+</sup> (vacuum)  $\Lambda(\delta\delta)(\lambda\delta\lambda)$  (0 imaginary frequencies)

| Center<br>Number | Atomic<br>Number | Coordinates (Angstroms) |           |           |
|------------------|------------------|-------------------------|-----------|-----------|
|                  |                  | X                       | Y         | Z         |
| 1                | 67               | -0.036450               | -0.257447 | 0.011927  |
| 2                | 7                | -2.793553               | -1.203367 | 0.081898  |
| 3                | 7                | 2.022731                | -0.811143 | -1.772066 |
| 4                | 8                | -0.793683               | -1.426774 | -2.041246 |
| 5                | 8                | 1.686974                | -2.307348 | 0.618574  |

|    |   |           |           |           |
|----|---|-----------|-----------|-----------|
| 6  | 8 | -0.753221 | -2.384756 | 1.530821  |
| 7  | 6 | 3.044198  | -1.760589 | -1.257228 |
| 8  | 1 | 3.647773  | -2.173440 | -2.079981 |
| 9  | 1 | 3.721102  | -1.204401 | -0.605742 |
| 10 | 6 | 2.451573  | -2.888250 | -0.440968 |
| 11 | 1 | 1.806778  | -3.555146 | -1.032243 |
| 12 | 1 | 3.268982  | -3.492070 | -0.025595 |
| 13 | 6 | 1.424260  | -3.238921 | 1.675404  |
| 14 | 1 | 2.322826  | -3.370626 | 2.292095  |
| 15 | 1 | 1.143488  | -4.207909 | 1.241168  |
| 16 | 6 | 0.272793  | -2.690926 | 2.487754  |
| 17 | 1 | -0.074255 | -3.451356 | 3.196678  |
| 18 | 1 | 0.535844  | -1.778591 | 3.031300  |
| 19 | 6 | -2.088344 | -2.660045 | 1.946820  |
| 20 | 1 | -2.384369 | -1.970306 | 2.747340  |
| 21 | 1 | -2.156926 | -3.683409 | 2.338846  |
| 22 | 6 | -2.952019 | -2.534326 | 0.703157  |
| 23 | 1 | -2.624283 | -3.296320 | -0.008316 |
| 24 | 1 | -4.005247 | -2.746141 | 0.948212  |
| 25 | 6 | -3.150270 | -1.214946 | -1.355781 |
| 26 | 1 | -3.224435 | -0.177113 | -1.687147 |
| 27 | 1 | -4.134765 | -1.685377 | -1.523587 |
| 28 | 6 | -3.616820 | -0.223453 | 0.831635  |
| 29 | 1 | -3.439943 | -0.382300 | 1.900451  |
| 30 | 1 | -4.691355 | -0.402029 | 0.661103  |
| 31 | 6 | -2.131083 | -1.934163 | -2.242103 |
| 32 | 1 | -2.103363 | -3.011798 | -2.048110 |
| 33 | 1 | -2.425759 | -1.790690 | -3.286311 |
| 34 | 6 | -0.054277 | -0.981035 | -3.211999 |
| 35 | 6 | 1.416226  | -1.340433 | -3.022477 |
| 36 | 6 | -3.273514 | 1.206437  | 0.485515  |
| 37 | 6 | -4.173694 | 2.260669  | 0.659522  |
| 38 | 1 | -5.159205 | 2.075913  | 1.076386  |
| 39 | 6 | -3.785488 | 3.545812  | 0.278058  |
| 40 | 1 | -4.461821 | 4.383992  | 0.417267  |
| 41 | 6 | -2.541371 | 3.731024  | -0.326083 |
| 42 | 1 | -2.204789 | 4.692338  | -0.697207 |
| 43 | 6 | -1.717508 | 2.621259  | -0.484440 |
| 44 | 6 | -0.422269 | 2.660859  | -1.271962 |
| 45 | 7 | -2.057865 | 1.398841  | -0.037434 |
| 46 | 6 | 2.689364  | 0.507923  | -1.965276 |
| 47 | 1 | 2.001960  | 1.166014  | -2.499757 |
| 48 | 1 | 3.608125  | 0.392568  | -2.560252 |
| 49 | 6 | 3.002744  | 1.146978  | -0.623903 |
| 50 | 6 | 4.106220  | 1.973960  | -0.411004 |
| 51 | 1 | 4.809795  | 2.164387  | -1.215527 |
| 52 | 6 | 4.283580  | 2.556134  | 0.847499  |
| 53 | 1 | 5.134328  | 3.206383  | 1.028898  |
| 54 | 6 | 3.366269  | 2.294801  | 1.864453  |
| 55 | 1 | 3.455213  | 2.716296  | 2.859089  |
| 56 | 6 | 2.289345  | 1.458780  | 1.576930  |
| 57 | 6 | 1.209661  | 1.126592  | 2.601450  |
| 58 | 7 | 2.128198  | 0.901268  | 0.365898  |
| 59 | 8 | 0.204797  | 0.442036  | 2.095010  |
| 60 | 8 | 1.335987  | 1.485342  | 3.757628  |
| 61 | 8 | 0.011186  | 3.714664  | -1.707805 |
| 62 | 8 | 0.089648  | 1.468254  | -1.438753 |
| 63 | 1 | 1.489507  | -2.431668 | -2.993103 |
| 64 | 1 | 1.977048  | -1.004203 | -3.907591 |
| 65 | 1 | -0.431725 | -1.504606 | -4.096423 |
| 66 | 1 | -0.205914 | 0.095173  | -3.322756 |

-----  
HF = -1715.9071018 Hartrees  
Zero-point correction = 0.541878 Hartrees  
Sum of electronic and thermal Enthalpies = -1715.332255 Hartrees  
Sum of electronic and thermal Free Energies = -1715.426932 Hartrees

[Ho(bp15c5)]<sup>+</sup> (vacuum)  $\Lambda(\lambda\delta)(\delta\delta\delta)$  (0 imaginary frequencies)

| Center<br>Number | Atomic<br>Number | Coordinates (Angstroms) |           |           |
|------------------|------------------|-------------------------|-----------|-----------|
|                  |                  | X                       | Y         | Z         |
| 1                | 67               | -0.137731               | 0.097186  | 0.009099  |
| 2                | 7                | -2.205611               | 1.754745  | -0.747401 |
| 3                | 7                | 1.710545                | 0.384980  | 1.943304  |
| 4                | 8                | -0.890743               | 1.661734  | 1.790147  |
| 5                | 8                | 3.056550                | 1.256800  | -0.595651 |
| 6                | 8                | 0.568231                | 2.392820  | -1.079721 |
| 7                | 6                | 2.730406                | 1.463799  | 1.818322  |
| 8                | 6                | 3.715371                | 1.311437  | 0.659530  |
| 9                | 6                | 2.958606                | 2.469745  | -1.326769 |
| 10               | 6                | 1.634328                | 2.429144  | -2.060125 |
| 11               | 6                | -0.395050               | 3.452854  | -1.120152 |
| 12               | 6                | -1.747777               | 2.906122  | -1.561012 |
| 13               | 6                | -2.886552               | 2.163899  | 0.509592  |
| 14               | 1                | -3.455277               | 1.303363  | 0.865653  |
| 15               | 1                | -3.606984               | 2.976098  | 0.320499  |
| 16               | 6                | -3.115395               | 0.904994  | -1.571425 |
| 17               | 1                | -2.594535               | 0.697912  | -2.513067 |
| 18               | 1                | -4.047913               | 1.436407  | -1.815569 |
| 19               | 6                | -1.961591               | 2.606631  | 1.646380  |
| 20               | 1                | -1.544379               | 3.608773  | 1.493239  |
| 21               | 1                | -2.547513               | 2.632640  | 2.574180  |
| 22               | 6                | -0.082334               | 1.844543  | 2.971036  |
| 23               | 6                | 0.851611                | 0.648912  | 3.132677  |
| 24               | 6                | -3.422509               | -0.412003 | -0.894043 |
| 25               | 6                | -4.624024               | -1.100006 | -1.061013 |
| 26               | 1                | -5.406842               | -0.691606 | -1.692588 |
| 27               | 6                | -4.797653               | -2.319451 | -0.399609 |
| 28               | 1                | -5.721253               | -2.877404 | -0.522370 |
| 29               | 6                | -3.789547               | -2.796751 | 0.436853  |
| 30               | 1                | -3.878807               | -3.718487 | 1.000304  |
| 31               | 6                | -2.624603               | -2.043240 | 0.561386  |
| 32               | 6                | -1.490476               | -2.427969 | 1.500126  |
| 33               | 7                | -2.445253               | -0.893494 | -0.111363 |
| 34               | 6                | 2.353034                | -0.960317 | 2.077967  |
| 35               | 1                | 1.639158                | -1.608863 | 2.592213  |
| 36               | 1                | 3.259903                | -0.897142 | 2.696733  |
| 37               | 6                | 2.661421                | -1.615190 | 0.742205  |
| 38               | 6                | 3.710727                | -2.518415 | 0.558116  |
| 39               | 1                | 4.384624                | -2.752157 | 1.376855  |
| 40               | 6                | 3.873295                | -3.116426 | -0.694505 |
| 41               | 1                | 4.680456                | -3.825106 | -0.855333 |
| 42               | 6                | 3.003933                | -2.790731 | -1.736216 |
| 43               | 1                | 3.093834                | -3.213573 | -2.730187 |
| 44               | 6                | 1.984351                | -1.879072 | -1.476732 |
| 45               | 6                | 0.992365                | -1.420535 | -2.542327 |
| 46               | 7                | 1.825836                | -1.326248 | -0.263528 |
| 47               | 8                | 0.089507                | -0.575655 | -2.085439 |
| 48               | 8                | 1.099581                | -1.823613 | -3.685351 |
| 49               | 8                | -1.584981               | -3.428297 | 2.190131  |

|    |   |           |           |           |
|----|---|-----------|-----------|-----------|
| 50 | 8 | -0.497596 | -1.576205 | 1.471050  |
| 51 | 1 | -2.493271 | 3.717926  | -1.560724 |
| 52 | 1 | -1.642694 | 2.559760  | -2.592886 |
| 53 | 1 | -0.076717 | 4.229791  | -1.823441 |
| 54 | 1 | -0.428970 | 3.909903  | -0.128674 |
| 55 | 1 | 1.519082  | 3.307533  | -2.703035 |
| 56 | 1 | 1.554476  | 1.526124  | -2.670680 |
| 57 | 1 | 2.988337  | 3.342062  | -0.658653 |
| 58 | 1 | 3.786400  | 2.555282  | -2.045860 |
| 59 | 1 | 4.422728  | 2.150461  | 0.700738  |
| 60 | 1 | 4.301515  | 0.393786  | 0.752607  |
| 61 | 1 | 2.202824  | 2.415216  | 1.697142  |
| 62 | 1 | 3.312778  | 1.529167  | 2.753460  |
| 63 | 1 | 0.241190  | -0.241983 | 3.291592  |
| 64 | 1 | 1.460471  | 0.817118  | 4.035796  |
| 65 | 1 | -0.737851 | 1.891506  | 3.849382  |
| 66 | 1 | 0.448564  | 2.801624  | 2.893047  |

-----  
 HF = -1715.906025 Hartrees

Zero-point correction = 0.541491 Hartrees

Sum of electronic and thermal Enthalpies = -1715.331453 Hartrees

Sum of electronic and thermal Free Energies = -1715.426889 Hartrees

[Ho(bp15c5)]<sup>+</sup> (vacuum)  $\Lambda(\lambda\lambda)(\delta\delta\lambda)$  (0 imaginary frequencies)

| Center<br>Number | Atomic<br>Number | Coordinates (Angstroms) |           |           |
|------------------|------------------|-------------------------|-----------|-----------|
|                  |                  | X                       | Y         | Z         |
| 1                | 67               | -0.013310               | 0.146408  | 0.035150  |
| 2                | 7                | -2.385107               | 1.896276  | -0.006729 |
| 3                | 7                | 1.450908                | -0.597080 | 2.171989  |
| 4                | 8                | -1.223833               | 0.365120  | 2.209058  |
| 5                | 8                | 2.038100                | 1.772592  | 0.796678  |
| 6                | 8                | 0.203761                | 2.825146  | -0.598240 |
| 7                | 6                | 2.169686                | 0.526174  | 2.813643  |
| 8                | 6                | 2.947623                | 1.371145  | 1.820005  |
| 9                | 6                | 2.447969                | 2.948836  | 0.090947  |
| 10               | 6                | 1.509542                | 3.122988  | -1.090730 |
| 11               | 6                | -0.881341               | 3.304143  | -1.394394 |
| 12               | 1                | -0.997863               | 2.674882  | -2.285687 |
| 13               | 1                | -0.685267               | 4.335321  | -1.716773 |
| 14               | 6                | -2.085061               | 3.281153  | -0.471186 |
| 15               | 1                | -1.840767               | 3.898919  | 0.395863  |
| 16               | 1                | -2.957830               | 3.736360  | -0.961639 |
| 17               | 6                | -2.905627               | 1.911175  | 1.383876  |
| 18               | 6                | -3.331600               | 1.300716  | -0.978756 |
| 19               | 1                | -2.975407               | 1.568784  | -1.980780 |
| 20               | 1                | -4.331365               | 1.751073  | -0.868633 |
| 21               | 6                | -2.638269               | 0.657799  | 2.212016  |
| 22               | 6                | -0.723795               | -0.250520 | 3.418045  |
| 23               | 1                | -1.513893               | -0.856490 | 3.875076  |
| 24               | 1                | -0.463536               | 0.548714  | 4.121980  |
| 25               | 6                | 0.448755                | -1.179833 | 3.103220  |
| 26               | 1                | 0.061547                | -2.075939 | 2.618443  |
| 27               | 1                | 0.910509                | -1.474085 | 4.059940  |
| 28               | 6                | -3.436893               | -0.202923 | -0.925842 |
| 29               | 6                | -4.616170               | -0.859220 | -1.285409 |
| 30               | 1                | -5.495983               | -0.284663 | -1.558635 |
| 31               | 6                | -4.640308               | -2.254244 | -1.291922 |
| 32               | 1                | -5.543476               | -2.785550 | -1.577280 |



|    |   |           |           |           |
|----|---|-----------|-----------|-----------|
| 33 | 6 | -3.496417 | -2.950136 | -0.908030 |
| 34 | 1 | -3.449501 | -4.032156 | -0.865356 |
| 35 | 6 | -2.366720 | -2.221019 | -0.544780 |
| 36 | 6 | -1.116687 | -2.909366 | -0.028727 |
| 37 | 7 | -2.329844 | -0.873918 | -0.571710 |
| 38 | 6 | 2.396707  | -1.661705 | 1.722619  |
| 39 | 1 | 1.832792  | -2.597607 | 1.685669  |
| 40 | 1 | 3.209522  | -1.788635 | 2.452536  |
| 41 | 6 | 2.960093  | -1.459701 | 0.327406  |
| 42 | 6 | 4.179675  | -2.011890 | -0.073852 |
| 43 | 1 | 4.813095  | -2.522626 | 0.645112  |
| 44 | 6 | 4.556712  | -1.912953 | -1.415475 |
| 45 | 1 | 5.498012  | -2.341075 | -1.747498 |
| 46 | 6 | 3.713804  | -1.271643 | -2.323843 |
| 47 | 1 | 3.948949  | -1.176990 | -3.377772 |
| 48 | 6 | 2.519161  | -0.738626 | -1.846284 |
| 49 | 6 | 1.514961  | -0.027890 | -2.749396 |
| 50 | 7 | 2.173483  | -0.824100 | -0.550871 |
| 51 | 8 | 0.405737  | 0.310665  | -2.131264 |
| 52 | 8 | 1.798743  | 0.192388  | -3.913624 |
| 53 | 8 | -1.089218 | -4.125139 | 0.075003  |
| 54 | 8 | -0.171778 | -2.072649 | 0.300094  |
| 55 | 1 | 1.432487  | 1.175795  | 3.293270  |
| 56 | 1 | 2.851473  | 0.161915  | 3.599003  |
| 57 | 1 | 3.792168  | 0.830664  | 1.374548  |
| 58 | 1 | 3.342985  | 2.254256  | 2.339138  |
| 59 | 1 | -2.959783 | 0.867414  | 3.238708  |
| 60 | 1 | -3.178049 | -0.222916 | 1.852926  |
| 61 | 1 | -3.990337 | 2.107876  | 1.405766  |
| 62 | 1 | -2.417970 | 2.740157  | 1.903211  |
| 63 | 1 | 1.559457  | 4.159429  | -1.448895 |
| 64 | 1 | 1.757598  | 2.454885  | -1.921308 |
| 65 | 1 | 2.385541  | 3.806711  | 0.773589  |
| 66 | 1 | 3.483666  | 2.848251  | -0.258824 |

-----  
 HF = -1715.9094183 Hartrees

Zero-point correction = 0.542287 Hartrees

Sum of electronic and thermal Enthalpies = -1715.334210 Hartrees

Sum of electronic and thermal Free Energies = -1715.428574 Hartrees

[Ho(bp15c5)]<sup>+</sup> (vacuum)  $\Lambda(\delta\lambda)(\lambda\delta\lambda)$  (0 imaginary frequencies)

| Center<br>Number | Atomic<br>Number | Coordinates (Angstroms) |           |           |
|------------------|------------------|-------------------------|-----------|-----------|
|                  |                  | X                       | Y         | Z         |
| 1                | 67               | -0.009032               | -0.257250 | -0.011954 |
| 2                | 7                | 2.758796                | -1.475410 | -0.055235 |
| 3                | 7                | -1.912464               | -0.523560 | 1.973740  |
| 4                | 8                | 0.981475                | -0.916609 | 2.229495  |
| 5                | 8                | -1.755240               | -2.321051 | -0.197473 |
| 6                | 8                | 0.534016                | -2.488106 | -1.401294 |
| 7                | 6                | -2.953895               | -1.550132 | 1.702403  |
| 8                | 1                | -3.461591               | -1.850697 | 2.631508  |
| 9                | 1                | -3.706639               | -1.101643 | 1.050965  |
| 10               | 6                | -2.407814               | -2.770709 | 0.994125  |
| 11               | 1                | -1.695468               | -3.343182 | 1.605974  |
| 12               | 1                | -3.241888               | -3.435894 | 0.736711  |
| 13               | 6                | -1.630026               | -3.352339 | -1.186170 |
| 14               | 6                | -0.594400               | -2.891013 | -2.189141 |
| 15               | 6                | 1.822769                | -2.821718 | -1.913327 |

|    |   |           |           |           |
|----|---|-----------|-----------|-----------|
| 16 | 1 | 2.105298  | -2.120629 | -2.708599 |
| 17 | 1 | 1.806683  | -3.832120 | -2.341565 |
| 18 | 6 | 2.762159  | -2.800684 | -0.720597 |
| 19 | 1 | 2.400671  | -3.546653 | -0.008387 |
| 20 | 1 | 3.775512  | -3.102260 | -1.031007 |
| 21 | 6 | 3.150152  | -1.588999 | 1.374058  |
| 22 | 6 | 3.642104  | -0.574262 | -0.828655 |
| 23 | 1 | 3.476900  | -0.775188 | -1.892860 |
| 24 | 1 | 4.701341  | -0.808411 | -0.631929 |
| 25 | 6 | 2.401225  | -0.675704 | 2.341029  |
| 26 | 6 | 0.222235  | -0.321818 | 3.310961  |
| 27 | 6 | -1.206276 | -0.841156 | 3.241609  |
| 28 | 6 | 3.393969  | 0.895591  | -0.593854 |
| 29 | 6 | 4.394888  | 1.845404  | -0.818354 |
| 30 | 1 | 5.380536  | 1.529480  | -1.146784 |
| 31 | 6 | 4.107005  | 3.193883  | -0.611692 |
| 32 | 1 | 4.864654  | 3.950332  | -0.793678 |
| 33 | 6 | 2.847332  | 3.549265  | -0.131135 |
| 34 | 1 | 2.570138  | 4.571798  | 0.098138  |
| 35 | 6 | 1.919013  | 2.538156  | 0.095671  |
| 36 | 6 | 0.592981  | 2.809343  | 0.778021  |
| 37 | 7 | 2.170133  | 1.241310  | -0.174518 |
| 38 | 6 | -2.585377 | 0.805150  | 2.014173  |
| 39 | 1 | -1.870830 | 1.542607  | 2.385148  |
| 40 | 1 | -3.450777 | 0.778488  | 2.693598  |
| 41 | 6 | -3.010769 | 1.232830  | 0.621684  |
| 42 | 6 | -4.135021 | 2.021159  | 0.374331  |
| 43 | 1 | -4.783425 | 2.321217  | 1.191749  |
| 44 | 6 | -4.402564 | 2.425117  | -0.936946 |
| 45 | 1 | -5.271268 | 3.041756  | -1.148037 |
| 46 | 6 | -3.545904 | 2.037112  | -1.966228 |
| 47 | 1 | -3.699002 | 2.327715  | -2.999203 |
| 48 | 6 | -2.442160 | 1.251800  | -1.639575 |
| 49 | 6 | -1.407425 | 0.815656  | -2.669365 |
| 50 | 7 | -2.203178 | 0.852213  | -0.380864 |
| 51 | 8 | -0.348335 | 0.247649  | -2.129607 |
| 52 | 8 | -1.608992 | 0.998158  | -3.855673 |
| 53 | 8 | 0.250921  | 3.950595  | 1.039434  |
| 54 | 8 | -0.048442 | 1.708844  | 1.071864  |
| 55 | 1 | -1.169054 | -1.930511 | 3.339251  |
| 56 | 1 | -1.763621 | -0.458786 | 4.110505  |
| 57 | 1 | 0.664414  | -0.634358 | 4.264998  |
| 58 | 1 | 0.274528  | 0.767244  | 3.223403  |
| 59 | 1 | 2.721167  | -0.928782 | 3.360029  |
| 60 | 1 | 2.601593  | 0.385292  | 2.168663  |
| 61 | 1 | 4.228147  | -1.407812 | 1.507501  |
| 62 | 1 | 2.961157  | -2.617733 | 1.692858  |
| 63 | 1 | -0.326780 | -3.720927 | -2.852884 |
| 64 | 1 | -0.934369 | -2.044426 | -2.792786 |
| 65 | 1 | -1.292911 | -4.278154 | -0.701426 |
| 66 | 1 | -2.601405 | -3.531315 | -1.664921 |

-----  
HF = -1715.9059945 Hartrees

Zero-point correction = 0.542029 Hartrees

Sum of electronic and thermal Enthalpies = -1715.331044 Hartrees

Sum of electronic and thermal Free Energies = -1715.425932 Hartrees

| [Ho(bp15c5)] <sup>+</sup> (vacuum) $\Lambda(\lambda\delta)(\lambda\lambda\lambda)$ |               | (0 imaginary frequencies) |           |           |
|------------------------------------------------------------------------------------|---------------|---------------------------|-----------|-----------|
| Center Number                                                                      | Atomic Number | Coordinates (Angstroms)   |           |           |
|                                                                                    |               | X                         | Y         | Z         |
| 1                                                                                  | 67            | 0.034288                  | -0.119393 | 0.033056  |
| 2                                                                                  | 7             | 2.611865                  | -1.414091 | -0.346383 |
| 3                                                                                  | 7             | -1.826000                 | -0.489942 | 2.002549  |
| 4                                                                                  | 8             | 0.917680                  | -1.410954 | 2.009649  |
| 5                                                                                  | 8             | -1.940682                 | -1.824896 | -0.405657 |
| 6                                                                                  | 8             | 0.314746                  | -2.580590 | -1.441342 |
| 7                                                                                  | 6             | -2.733671                 | -1.657591 | 1.807962  |
| 8                                                                                  | 1             | -2.891708                 | -2.194586 | 2.753794  |
| 9                                                                                  | 1             | -3.707240                 | -1.280067 | 1.485187  |
| 10                                                                                 | 6             | -2.248406                 | -2.626574 | 0.734283  |
| 11                                                                                 | 1             | -1.365590                 | -3.201796 | 1.045064  |
| 12                                                                                 | 1             | -3.048693                 | -3.338330 | 0.493958  |
| 13                                                                                 | 6             | -2.032996                 | -2.429892 | -1.697991 |
| 14                                                                                 | 6             | -0.803598                 | -3.277405 | -1.990574 |
| 15                                                                                 | 6             | 1.566508                  | -2.903083 | -2.047790 |
| 16                                                                                 | 1             | 1.730501                  | -2.247242 | -2.912214 |
| 17                                                                                 | 1             | 1.566503                  | -3.941674 | -2.401938 |
| 18                                                                                 | 6             | 2.628936                  | -2.754932 | -0.975201 |
| 19                                                                                 | 1             | 2.423864                  | -3.502883 | -0.205777 |
| 20                                                                                 | 1             | 3.622868                  | -2.984761 | -1.391156 |
| 21                                                                                 | 6             | 3.138297                  | -1.487186 | 1.036983  |
| 22                                                                                 | 1             | 3.346370                  | -0.471295 | 1.377549  |
| 23                                                                                 | 1             | 4.086280                  | -2.049508 | 1.077449  |
| 24                                                                                 | 6             | 3.404858                  | -0.481040 | -1.185355 |
| 25                                                                                 | 1             | 3.020477                  | -0.553051 | -2.209424 |
| 26                                                                                 | 1             | 4.463606                  | -0.786159 | -1.217916 |
| 27                                                                                 | 6             | 2.164726                  | -2.128228 | 2.021924  |
| 28                                                                                 | 1             | 1.971257                  | -3.185900 | 1.801912  |
| 29                                                                                 | 1             | 2.602042                  | -2.069005 | 3.026264  |
| 30                                                                                 | 6             | 0.068625                  | -1.677417 | 3.145211  |
| 31                                                                                 | 1             | 0.672574                  | -1.641859 | 4.060114  |
| 32                                                                                 | 1             | -0.346990                 | -2.689855 | 3.054426  |
| 33                                                                                 | 6             | -1.006842                 | -0.602414 | 3.232547  |
| 34                                                                                 | 1             | -0.515468                 | 0.360992  | 3.381810  |
| 35                                                                                 | 1             | -1.630068                 | -0.814813 | 4.116509  |
| 36                                                                                 | 6             | 3.303161                  | 0.953738  | -0.721300 |
| 37                                                                                 | 6             | 4.322300                  | 1.883092  | -0.936488 |
| 38                                                                                 | 1             | 5.226754                  | 1.590708  | -1.461166 |
| 39                                                                                 | 6             | 4.158524                  | 3.185318  | -0.460157 |
| 40                                                                                 | 1             | 4.933269                  | 3.928040  | -0.626079 |
| 41                                                                                 | 6             | 3.008958                  | 3.508580  | 0.259399  |
| 42                                                                                 | 1             | 2.840511                  | 4.487983  | 0.692247  |
| 43                                                                                 | 6             | 2.047489                  | 2.519000  | 0.444536  |
| 44                                                                                 | 6             | 0.810258                  | 2.735387  | 1.298273  |
| 45                                                                                 | 7             | 2.180008                  | 1.281409  | -0.067796 |
| 46                                                                                 | 6             | -2.618835                 | 0.777381  | 2.022429  |
| 47                                                                                 | 1             | -1.972526                 | 1.557318  | 2.431562  |
| 48                                                                                 | 1             | -3.499924                 | 0.677511  | 2.671817  |
| 49                                                                                 | 6             | -3.025967                 | 1.222939  | 0.631277  |
| 50                                                                                 | 6             | -4.230164                 | 1.873505  | 0.356406  |
| 51                                                                                 | 1             | -4.961212                 | 2.027762  | 1.144105  |
| 52                                                                                 | 6             | -4.470802                 | 2.330827  | -0.942960 |
| 53                                                                                 | 1             | -5.398990                 | 2.845560  | -1.173444 |
| 54                                                                                 | 6             | -3.517875                 | 2.116302  | -1.938101 |
| 55                                                                                 | 1             | -3.654824                 | 2.441565  | -2.963033 |
| 56                                                                                 | 6             | -2.345270                 | 1.448194  | -1.590035 |

|    |   |           |           |           |
|----|---|-----------|-----------|-----------|
| 57 | 6 | -1.249097 | 1.121916  | -2.601936 |
| 58 | 7 | -2.118982 | 1.024998  | -0.337257 |
| 59 | 8 | -0.213839 | 0.509013  | -2.068677 |
| 60 | 8 | -1.404216 | 1.406370  | -3.775633 |
| 61 | 8 | 0.614238  | 3.813460  | 1.833313  |
| 62 | 8 | 0.066301  | 1.663540  | 1.390858  |
| 63 | 1 | -0.866510 | -4.275961 | -1.534729 |
| 64 | 1 | -0.699212 | -3.399845 | -3.075796 |
| 65 | 1 | -2.089172 | -1.593768 | -2.396642 |
| 66 | 1 | -2.952804 | -3.022416 | -1.777174 |

-----  
 HF = -1715.9084236 Hartrees

Zero-point correction = 0.541482 Hartrees

Sum of electronic and thermal Enthalpies = -1715.333743 Hartrees

Sum of electronic and thermal Free Energies = -1715.429140 Hartrees

[Ho(bp15c5)]<sup>+</sup> (vacuum)  $\Lambda(\lambda\lambda)(\delta\delta\delta)$  (0 imaginary frequencies)

| Center<br>Number | Atomic<br>Number | Coordinates (Angstroms) |           |           |
|------------------|------------------|-------------------------|-----------|-----------|
|                  |                  | X                       | Y         | Z         |
| 1                | 67               | -0.109389               | 0.113819  | -0.022033 |
| 2                | 7                | -2.181947               | 1.817984  | -0.739356 |
| 3                | 7                | 1.648150                | 0.238409  | 2.003360  |
| 4                | 8                | -0.898222               | 1.610679  | 1.790352  |
| 5                | 8                | 3.093631                | 1.298854  | -0.399104 |
| 6                | 8                | 0.643238                | 2.494045  | -0.840713 |
| 7                | 6                | 2.662807                | 1.329120  | 2.007866  |
| 8                | 6                | 3.697639                | 1.267235  | 0.884591  |
| 9                | 6                | 3.029257                | 2.560328  | -1.047947 |
| 10               | 6                | 1.719316                | 2.599658  | -1.805710 |
| 11               | 6                | -0.373405               | 3.505575  | -0.899169 |
| 12               | 6                | -1.630701               | 2.940398  | -1.538980 |
| 13               | 6                | -2.829879               | 2.328744  | 0.508832  |
| 14               | 6                | -3.113581               | 1.020611  | -1.576961 |
| 15               | 1                | -2.607618               | 0.822065  | -2.529173 |
| 16               | 1                | -4.031997               | 1.583791  | -1.802340 |
| 17               | 6                | -2.340164               | 1.690534  | 1.815284  |
| 18               | 6                | -0.203676               | 1.602132  | 3.064111  |
| 19               | 6                | 0.734237                | 0.398983  | 3.170833  |
| 20               | 6                | -3.448625               | -0.304052 | -0.933310 |
| 21               | 6                | -4.671307               | -0.953324 | -1.107173 |
| 22               | 1                | -5.453876               | -0.495660 | -1.704429 |
| 23               | 6                | -4.864164               | -2.198365 | -0.502887 |
| 24               | 1                | -5.804261               | -2.726574 | -0.631970 |
| 25               | 6                | -3.848783               | -2.742657 | 0.282410  |
| 26               | 1                | -3.946683               | -3.691407 | 0.797545  |
| 27               | 6                | -2.664097               | -2.023601 | 0.419814  |
| 28               | 6                | -1.525255               | -2.485102 | 1.314803  |
| 29               | 7                | -2.467410               | -0.842597 | -0.193550 |
| 30               | 6                | 2.296980                | -1.109689 | 2.053311  |
| 31               | 1                | 1.575913                | -1.799621 | 2.498366  |
| 32               | 1                | 3.186374                | -1.089226 | 2.699555  |
| 33               | 6                | 2.648524                | -1.662685 | 0.682001  |
| 34               | 6                | 3.704199                | -2.551679 | 0.466750  |
| 35               | 1                | 4.350512                | -2.846038 | 1.288192  |
| 36               | 6                | 3.909432                | -3.056398 | -0.820079 |
| 37               | 1                | 4.722190                | -3.752651 | -1.005138 |
| 38               | 6                | 3.075619                | -2.653786 | -1.864135 |
| 39               | 1                | 3.199805                | -3.002783 | -2.882772 |

|    |   |           |           |           |
|----|---|-----------|-----------|-----------|
| 40 | 6 | 2.047483  | -1.761640 | -1.573209 |
| 41 | 6 | 1.092818  | -1.222961 | -2.635821 |
| 42 | 7 | 1.847630  | -1.299523 | -0.328226 |
| 43 | 8 | 0.175897  | -0.408463 | -2.149486 |
| 44 | 8 | 1.237096  | -1.542868 | -3.800403 |
| 45 | 8 | -1.623453 | -3.527123 | 1.939691  |
| 46 | 8 | -0.523313 | -1.644091 | 1.331121  |
| 47 | 1 | -2.375815 | 3.740736  | -1.676338 |
| 48 | 1 | -1.372395 | 2.553602  | -2.529054 |
| 49 | 1 | -0.016411 | 4.368420  | -1.470967 |
| 50 | 1 | -0.553602 | 3.836517  | 0.127579  |
| 51 | 1 | 1.627767  | 3.536407  | -2.364763 |
| 52 | 1 | 1.640901  | 1.760032  | -2.501877 |
| 53 | 1 | 3.059385  | 3.383052  | -0.320329 |
| 54 | 1 | 3.872437  | 2.679750  | -1.743694 |
| 55 | 1 | 4.394706  | 2.105570  | 1.015482  |
| 56 | 1 | 4.289276  | 0.349619  | 0.937574  |
| 57 | 1 | 2.132552  | 2.284076  | 1.937634  |
| 58 | 1 | 3.204777  | 1.324117  | 2.969220  |
| 59 | 1 | 0.130835  | -0.508104 | 3.226114  |
| 60 | 1 | 1.301770  | 0.497298  | 4.110935  |
| 61 | 1 | -0.931163 | 1.542300  | 3.879582  |
| 62 | 1 | 0.321558  | 2.558663  | 3.149061  |
| 63 | 1 | -2.657012 | 2.323676  | 2.651572  |
| 64 | 1 | -2.748130 | 0.685920  | 1.962966  |
| 65 | 1 | -3.917563 | 2.191374  | 0.456877  |
| 66 | 1 | -2.657148 | 3.406744  | 0.572175  |

-----  
 HF = -1715.9019841 Hartrees

Zero-point correction = 0.541658 Hartrees

Sum of electronic and thermal Enthalpies = -1715.327312 Hartrees

Sum of electronic and thermal Free Energies = -1715.422507 Hartrees

-----  
 [Ho(bp15c5)]<sup>+</sup> (vacuum)  $\Lambda(\lambda\delta)(\delta\lambda\delta)$  (0 imaginary frequencies)

| Center<br>Number | Atomic<br>Number | Coordinates (Angstroms) |          |           |
|------------------|------------------|-------------------------|----------|-----------|
|                  |                  | X                       | Y        | Z         |
| 1                | 67               | -0.038708               | 0.115626 | -0.016506 |
| 2                | 7                | -2.577306               | 1.463080 | -0.507762 |
| 3                | 7                | 1.704602                | 0.207187 | 2.080624  |
| 4                | 8                | -1.040308               | 1.143638 | 2.005353  |
| 5                | 8                | 1.938072                | 1.944782 | -0.073858 |
| 6                | 8                | -0.233298               | 2.893013 | -1.129357 |
| 7                | 6                | 2.568598                | 1.408528 | 2.134743  |
| 8                | 6                | 3.085397                | 1.817386 | 0.765402  |
| 9                | 6                | 2.102474                | 2.705685 | -1.280754 |
| 10               | 6                | 0.940806                | 3.673711 | -1.322694 |
| 11               | 6                | -1.403926               | 3.668727 | -0.930546 |
| 12               | 6                | -2.589927               | 2.768071 | -1.218736 |
| 13               | 6                | -3.148274               | 1.553524 | 0.860756  |
| 14               | 1                | -3.499736               | 0.559221 | 1.143793  |
| 15               | 1                | -4.022829               | 2.224869 | 0.880076  |
| 16               | 6                | -3.372944               | 0.522627 | -1.348170 |
| 17               | 1                | -2.928401               | 0.540430 | -2.349633 |
| 18               | 1                | -4.415038               | 0.865784 | -1.447376 |
| 19               | 6                | -2.184239               | 2.016993 | 1.952933  |
| 20               | 1                | -1.841095               | 3.048424 | 1.815715  |
| 21               | 1                | -2.714504               | 1.964117 | 2.912093  |
| 22               | 6                | -0.295667               | 1.213367 | 3.240713  |

|    |   |           |           |           |
|----|---|-----------|-----------|-----------|
| 23 | 1 | -0.978238 | 1.018551  | 4.077120  |
| 24 | 1 | 0.095795  | 2.231877  | 3.357235  |
| 25 | 6 | 0.799789  | 0.147270  | 3.257263  |
| 26 | 1 | 0.327629  | -0.836185 | 3.245101  |
| 27 | 1 | 1.352596  | 0.253342  | 4.204967  |
| 28 | 6 | -3.347922 | -0.897525 | -0.845841 |
| 29 | 6 | -4.424600 | -1.767880 | -1.025993 |
| 30 | 1 | -5.326784 | -1.422427 | -1.521267 |
| 31 | 6 | -4.318536 | -3.079218 | -0.559459 |
| 32 | 1 | -5.138930 | -3.777199 | -0.697771 |
| 33 | 6 | -3.159806 | -3.468013 | 0.109530  |
| 34 | 1 | -3.024368 | -4.458772 | 0.527852  |
| 35 | 6 | -2.139675 | -2.532653 | 0.262751  |
| 36 | 6 | -0.884638 | -2.835210 | 1.055602  |
| 37 | 7 | -2.220759 | -1.282812 | -0.230094 |
| 38 | 6 | 2.529664  | -1.031619 | 1.976672  |
| 39 | 1 | 1.905690  | -1.867971 | 2.299347  |
| 40 | 1 | 3.401840  | -0.972747 | 2.644277  |
| 41 | 6 | 2.971210  | -1.340981 | 0.556746  |
| 42 | 6 | 4.146061  | -2.038236 | 0.265076  |
| 43 | 1 | 4.822214  | -2.329577 | 1.063061  |
| 44 | 6 | 4.428237  | -2.361051 | -1.065025 |
| 45 | 1 | 5.334116  | -2.908102 | -1.309481 |
| 46 | 6 | 3.543223  | -1.976310 | -2.072626 |
| 47 | 1 | 3.711949  | -2.199014 | -3.119970 |
| 48 | 6 | 2.394901  | -1.278687 | -1.705405 |
| 49 | 6 | 1.353351  | -0.809542 | -2.719411 |
| 50 | 7 | 2.131612  | -0.975242 | -0.423293 |
| 51 | 8 | 0.310618  | -0.231765 | -2.161881 |
| 52 | 8 | 1.548670  | -0.978905 | -3.908436 |
| 53 | 8 | -0.734608 | -3.924841 | 1.583415  |
| 54 | 8 | -0.067365 | -1.818282 | 1.112768  |
| 55 | 1 | 1.036828  | 4.415769  | -0.516022 |
| 56 | 1 | 0.899898  | 4.201688  | -2.285668 |
| 57 | 1 | 2.084511  | 2.026899  | -2.139133 |
| 58 | 1 | 3.054552  | 3.246531  | -1.271827 |
| 59 | 1 | -3.526971 | 3.313573  | -1.022742 |
| 60 | 1 | -2.558281 | 2.551260  | -2.289022 |
| 61 | 1 | -1.409483 | 4.096716  | 0.082104  |
| 62 | 1 | -1.435101 | 4.509331  | -1.638317 |
| 63 | 1 | 3.597505  | 2.784673  | 0.849988  |
| 64 | 1 | 3.790066  | 1.092108  | 0.344109  |
| 65 | 1 | 3.414774  | 1.255868  | 2.822697  |
| 66 | 1 | 1.980615  | 2.243626  | 2.523084  |

-----  
 HF = -1715.9077935 Hartrees

Zero-point correction = 0.541888 Hartrees

Sum of electronic and thermal Enthalpies = -1715.332804 Hartrees

Sum of electronic and thermal Free Energies = -1715.428550 Hartrees

[Yb(bp15c5)]<sup>+</sup> (vacuum)  $\Lambda(\lambda\delta)(\delta\lambda\lambda)$

(0 imaginary frequencies)

| Center<br>Number | Atomic<br>Number | Coordinates (Angstroms) |           |           |
|------------------|------------------|-------------------------|-----------|-----------|
|                  |                  | X                       | Y         | Z         |
| 1                | 70               | 0.059974                | -0.165437 | 0.077002  |
| 2                | 7                | 2.508850                | -1.539597 | -0.300275 |
| 3                | 7                | -1.772432               | -0.297795 | 2.076253  |
| 4                | 8                | 0.950787                | -1.225650 | 2.117184  |
| 5                | 8                | -1.966721               | -2.039787 | -0.115229 |

|    |   |           |           |           |
|----|---|-----------|-----------|-----------|
| 6  | 8 | 0.139472  | -2.529767 | -1.403756 |
| 7  | 6 | -2.637759 | -1.500221 | 2.078033  |
| 8  | 6 | -3.130016 | -1.863512 | 0.689489  |
| 9  | 6 | -2.235314 | -2.383259 | -1.477896 |
| 10 | 6 | -1.012697 | -3.120741 | -2.000155 |
| 11 | 6 | 1.364395  | -2.969909 | -1.981720 |
| 12 | 1 | 1.600065  | -2.351888 | -2.857269 |
| 13 | 1 | 1.276685  | -4.012614 | -2.314532 |
| 14 | 6 | 2.415125  | -2.895024 | -0.889588 |
| 15 | 1 | 2.123553  | -3.595906 | -0.103235 |
| 16 | 1 | 3.392441  | -3.225423 | -1.276516 |
| 17 | 6 | 3.092881  | -1.606700 | 1.061155  |
| 18 | 1 | 3.424088  | -0.604663 | 1.340519  |
| 19 | 1 | 3.976604  | -2.265349 | 1.085721  |
| 20 | 6 | 3.333340  | -0.685245 | -1.192189 |
| 21 | 1 | 2.922341  | -0.768292 | -2.204097 |
| 22 | 1 | 4.372166  | -1.050305 | -1.232993 |
| 23 | 6 | 2.103312  | -2.087999 | 2.115528  |
| 24 | 1 | 1.774198  | -3.122192 | 1.952556  |
| 25 | 1 | 2.589768  | -2.038659 | 3.097314  |
| 26 | 6 | 0.160208  | -1.314139 | 3.321094  |
| 27 | 1 | 0.808472  | -1.128073 | 4.186235  |
| 28 | 1 | -0.232667 | -2.334939 | 3.409173  |
| 29 | 6 | -0.932904 | -0.250252 | 3.300581  |
| 30 | 1 | -0.459110 | 0.732025  | 3.323173  |
| 31 | 1 | -1.536451 | -0.367470 | 4.215312  |
| 32 | 6 | 3.309756  | 0.765669  | -0.776483 |
| 33 | 6 | 4.365983  | 1.640934  | -1.034952 |
| 34 | 1 | 5.252722  | 1.289105  | -1.553272 |
| 35 | 6 | 4.260699  | 2.967220  | -0.611604 |
| 36 | 1 | 5.065741  | 3.668676  | -0.809648 |
| 37 | 6 | 3.126352  | 3.369821  | 0.091925  |
| 38 | 1 | 2.998454  | 4.374539  | 0.478155  |
| 39 | 6 | 2.124816  | 2.430339  | 0.319378  |
| 40 | 6 | 0.887716  | 2.736737  | 1.139631  |
| 41 | 7 | 2.206500  | 1.165307  | -0.130227 |
| 42 | 6 | -2.591145 | 0.941750  | 1.954777  |
| 43 | 1 | -1.989838 | 1.768876  | 2.339966  |
| 44 | 1 | -3.503004 | 0.866781  | 2.565411  |
| 45 | 6 | -2.940689 | 1.300540  | 0.522489  |
| 46 | 6 | -4.081730 | 2.033716  | 0.187042  |
| 47 | 1 | -4.802573 | 2.303808  | 0.952700  |
| 48 | 6 | -4.270426 | 2.422586  | -1.141534 |
| 49 | 1 | -5.149648 | 2.996620  | -1.419165 |
| 50 | 6 | -3.321973 | 2.074491  | -2.103607 |
| 51 | 1 | -3.411811 | 2.354820  | -3.146850 |
| 52 | 6 | -2.211809 | 1.340569  | -1.693998 |
| 53 | 6 | -1.096458 | 0.923751  | -2.648701 |
| 54 | 7 | -2.044339 | 0.958859  | -0.415400 |
| 55 | 8 | -0.088545 | 0.346671  | -2.037955 |
| 56 | 8 | -1.213993 | 1.127955  | -3.843819 |
| 57 | 8 | 0.731042  | 3.839315  | 1.636620  |
| 58 | 8 | 0.089588  | 1.706337  | 1.247603  |
| 59 | 1 | -1.047362 | -4.183307 | -1.722142 |
| 60 | 1 | -0.971665 | -3.042522 | -3.094034 |
| 61 | 1 | -2.435699 | -1.472131 | -2.052261 |
| 62 | 1 | -3.115251 | -3.035135 | -1.542490 |
| 63 | 1 | -2.058317 | -2.347913 | 2.451735  |
| 64 | 1 | -3.496275 | -1.366418 | 2.754458  |
| 65 | 1 | -3.781577 | -1.092895 | 0.261425  |
| 66 | 1 | -3.697293 | -2.803300 | 0.734694  |

-----  
HF = -1717.6625976 Hartrees  
Zero-point correction = 0.542342 Hartrees  
Sum of electronic and thermal Enthalpies = -1717.087297 Hartrees  
Sum of electronic and thermal Free Energies = -1717.181900 Hartrees

[Yb(bp15c5)]<sup>+</sup> (vacuum)  $\Lambda(\lambda\delta)(\delta\delta\lambda)$  (0 imaginary frequencies)

| Center<br>Number | Atomic<br>Number | Coordinates (Angstroms) |           |           |
|------------------|------------------|-------------------------|-----------|-----------|
|                  |                  | X                       | Y         | Z         |
| 1                | 70               | 0.056879                | -0.150581 | 0.091644  |
| 2                | 7                | 2.472772                | -1.609507 | -0.272018 |
| 3                | 7                | -1.756263               | -0.148350 | 2.086028  |
| 4                | 8                | 0.924296                | -1.173832 | 2.142666  |
| 5                | 8                | -2.084795               | -1.884434 | -0.092996 |
| 6                | 8                | 0.041750                | -2.700689 | -1.236951 |
| 7                | 6                | -2.646045               | -1.330241 | 2.148386  |
| 8                | 6                | -3.194451               | -1.735441 | 0.791613  |
| 9                | 6                | -2.306046               | -2.846655 | -1.127546 |
| 10               | 6                | -1.117338               | -2.790948 | -2.066058 |
| 11               | 6                | 1.254211                | -3.017790 | -1.910833 |
| 12               | 1                | 1.424134                | -2.311868 | -2.734343 |
| 13               | 1                | 1.197727                | -4.031078 | -2.333000 |
| 14               | 6                | 2.340756                | -2.966711 | -0.854872 |
| 15               | 1                | 2.064014                | -3.666567 | -0.061930 |
| 16               | 1                | 3.300092                | -3.309568 | -1.272442 |
| 17               | 6                | 3.045775                | -1.676312 | 1.093789  |
| 18               | 1                | 3.416536                | -0.683579 | 1.357668  |
| 19               | 1                | 3.901588                | -2.369880 | 1.136537  |
| 20               | 6                | 3.332740                | -0.797155 | -1.168626 |
| 21               | 1                | 2.937612                | -0.895889 | -2.185351 |
| 22               | 1                | 4.361967                | -1.190540 | -1.183815 |
| 23               | 6                | 2.031162                | -2.096446 | 2.150486  |
| 24               | 1                | 1.647678                | -3.112500 | 1.993602  |
| 25               | 1                | 2.517188                | -2.064010 | 3.132952  |
| 26               | 6                | 0.154570                | -1.169569 | 3.363690  |
| 27               | 1                | 0.825096                | -0.957639 | 4.205478  |
| 28               | 1                | -0.268849               | -2.170260 | 3.515130  |
| 29               | 6                | -0.905411               | -0.072637 | 3.302399  |
| 30               | 1                | -0.403015               | 0.895069  | 3.278797  |
| 31               | 1                | -1.505944               | -0.131740 | 4.224622  |
| 32               | 6                | 3.343805                | 0.664242  | -0.793909 |
| 33               | 6                | 4.427332                | 1.499628  | -1.072460 |
| 34               | 1                | 5.307370                | 1.104066  | -1.570328 |
| 35               | 6                | 4.357766                | 2.842166  | -0.697006 |
| 36               | 1                | 5.184379                | 3.512872  | -0.911954 |
| 37               | 6                | 3.229413                | 3.300915  | -0.018800 |
| 38               | 1                | 3.126599                | 4.321800  | 0.330780  |
| 39               | 6                | 2.200082                | 2.398643  | 0.233044  |
| 40               | 6                | 0.968668                | 2.770825  | 1.033469  |
| 41               | 7                | 2.246950                | 1.116031  | -0.171153 |
| 42               | 6                | -2.548122               | 1.105369  | 1.918848  |
| 43               | 1                | -1.927639               | 1.932577  | 2.271379  |
| 44               | 1                | -3.459306               | 1.073121  | 2.533874  |
| 45               | 6                | -2.895130               | 1.409543  | 0.472922  |
| 46               | 6                | -4.028612               | 2.137795  | 0.101970  |
| 47               | 1                | -4.744126               | 2.457363  | 0.853473  |
| 48               | 6                | -4.217840               | 2.454192  | -1.245685 |
| 49               | 1                | -5.090127               | 3.024317  | -1.551679 |



|    |   |           |           |           |
|----|---|-----------|-----------|-----------|
| 50 | 6 | -3.283313 | 2.032385  | -2.192374 |
| 51 | 1 | -3.381589 | 2.246321  | -3.250489 |
| 52 | 6 | -2.180823 | 1.308550  | -1.746278 |
| 53 | 6 | -1.096845 | 0.786576  | -2.682340 |
| 54 | 7 | -2.006598 | 1.010818  | -0.447855 |
| 55 | 8 | -0.092225 | 0.222330  | -2.048023 |
| 56 | 8 | -1.229497 | 0.892508  | -3.888448 |
| 57 | 8 | 0.838555  | 3.896213  | 1.484861  |
| 58 | 8 | 0.144219  | 1.766502  | 1.179981  |
| 59 | 1 | -2.071092 | -2.176450 | 2.531996  |
| 60 | 1 | -3.479430 | -1.156870 | 2.847782  |
| 61 | 1 | -3.902162 | -1.005289 | 0.381494  |
| 62 | 1 | -3.720244 | -2.693101 | 0.899669  |
| 63 | 1 | -1.087929 | -3.707208 | -2.670925 |
| 64 | 1 | -1.157790 | -1.926264 | -2.736358 |
| 65 | 1 | -2.397326 | -3.840851 | -0.669429 |
| 66 | 1 | -3.231209 | -2.622944 | -1.674967 |

-----  
 HF = -1717.665603 Hartrees

Zero-point correction = 0.542536 Hartrees

Sum of electronic and thermal Enthalpies = -1717.090254 Hartrees

Sum of electronic and thermal Free Energies = -1717.184215 Hartrees

[La(bp15c5)]<sup>+</sup> (vacuum)  $\Lambda(\lambda\delta)(\delta\lambda\lambda)$  (0 imaginary frequencies)

| Center<br>Number | Atomic<br>Number | Coordinates (Angstroms) |           |           |
|------------------|------------------|-------------------------|-----------|-----------|
|                  |                  | X                       | Y         | Z         |
| 1                | 57               | 0.056519                | -0.148166 | -0.081045 |
| 2                | 7                | 2.707343                | -1.489847 | -0.296262 |
| 3                | 7                | -1.668982               | -0.257803 | 2.172757  |
| 4                | 8                | 1.147918                | -1.110743 | 2.171941  |
| 5                | 8                | -1.788460               | -2.265066 | 0.116956  |
| 6                | 8                | 0.319880                | -2.587063 | -1.400511 |
| 7                | 6                | -2.496190               | -1.488271 | 2.253279  |
| 8                | 6                | -2.959882               | -2.015072 | 0.902491  |
| 9                | 6                | -2.052604               | -2.772579 | -1.199511 |
| 10               | 6                | -0.785495               | -3.444332 | -1.697823 |
| 11               | 6                | 1.579358                | -3.014750 | -1.930464 |
| 12               | 1                | 1.805066                | -2.423983 | -2.826207 |
| 13               | 1                | 1.528244                | -4.068509 | -2.228466 |
| 14               | 6                | 2.627302                | -2.867386 | -0.835415 |
| 15               | 1                | 2.347239                | -3.539098 | -0.019548 |
| 16               | 1                | 3.607728                | -3.204217 | -1.210811 |
| 17               | 6                | 3.273187                | -1.491924 | 1.076132  |
| 18               | 1                | 3.572919                | -0.469696 | 1.316878  |
| 19               | 1                | 4.177570                | -2.120810 | 1.129499  |
| 20               | 6                | 3.532699                | -0.647724 | -1.200534 |
| 21               | 1                | 3.148508                | -0.777643 | -2.219443 |
| 22               | 1                | 4.577948                | -0.996984 | -1.212990 |
| 23               | 6                | 2.304258                | -1.960869 | 2.158335  |
| 24               | 1                | 1.985430                | -3.003177 | 2.022105  |
| 25               | 1                | 2.817763                | -1.892171 | 3.126057  |
| 26               | 6                | 0.362405                | -1.194347 | 3.373121  |
| 27               | 1                | 1.002507                | -0.978903 | 4.238653  |
| 28               | 1                | -0.015574               | -2.219031 | 3.485973  |
| 29               | 6                | -0.748760               | -0.147716 | 3.337721  |
| 30               | 1                | -0.284201               | 0.840133  | 3.281938  |
| 31               | 1                | -1.298113               | -0.210303 | 4.291457  |
| 32               | 6                | 3.493535                | 0.824459  | -0.841221 |

|    |   |           |           |           |
|----|---|-----------|-----------|-----------|
| 33 | 6 | 4.586347  | 1.664731  | -1.056779 |
| 34 | 1 | 5.502237  | 1.272260  | -1.488019 |
| 35 | 6 | 4.480142  | 3.012031  | -0.702848 |
| 36 | 1 | 5.313959  | 3.687239  | -0.871249 |
| 37 | 6 | 3.308654  | 3.468632  | -0.103325 |
| 38 | 1 | 3.177285  | 4.491463  | 0.230318  |
| 39 | 6 | 2.266593  | 2.563731  | 0.095110  |
| 40 | 6 | 0.995932  | 2.969488  | 0.838805  |
| 41 | 7 | 2.351433  | 1.278904  | -0.299092 |
| 42 | 6 | -2.518193 | 0.966529  | 2.097727  |
| 43 | 1 | -1.866115 | 1.819777  | 2.309017  |
| 44 | 1 | -3.305464 | 0.936325  | 2.865952  |
| 45 | 6 | -3.122091 | 1.223015  | 0.729674  |
| 46 | 6 | -4.354936 | 1.856297  | 0.561298  |
| 47 | 1 | -4.964155 | 2.108889  | 1.423705  |
| 48 | 6 | -4.779454 | 2.171257  | -0.732873 |
| 49 | 1 | -5.732368 | 2.669691  | -0.885320 |
| 50 | 6 | -3.971715 | 1.845010  | -1.821346 |
| 51 | 1 | -4.245933 | 2.069719  | -2.845664 |
| 52 | 6 | -2.758234 | 1.204056  | -1.574636 |
| 53 | 6 | -1.803023 | 0.817439  | -2.706833 |
| 54 | 7 | -2.360278 | 0.899971  | -0.327446 |
| 55 | 8 | -0.678752 | 0.290706  | -2.288427 |
| 56 | 8 | -2.146537 | 1.004057  | -3.861518 |
| 57 | 8 | 0.891858  | 4.113321  | 1.252040  |
| 58 | 8 | 0.138443  | 1.997073  | 0.982305  |
| 59 | 1 | -0.633769 | -4.409386 | -1.195408 |
| 60 | 1 | -0.866681 | -3.613102 | -2.778902 |
| 61 | 1 | -2.346819 | -1.946596 | -1.857004 |
| 62 | 1 | -2.864693 | -3.509804 | -1.168513 |
| 63 | 1 | -1.900748 | -2.277303 | 2.718439  |
| 64 | 1 | -3.374646 | -1.325670 | 2.896767  |
| 65 | 1 | -3.621369 | -1.314624 | 0.382826  |
| 66 | 1 | -3.505765 | -2.956125 | 1.055028  |

-----  
 HF = -1709.8299463 Hartrees

Zero-point correction = 0.540801 Hartrees

Sum of electronic and thermal Enthalpies = -1709.255781 Hartrees

Sum of electronic and thermal Free Energies = -1709.351631 Hartrees

[La(bp15c5)]<sup>+</sup> (vacuum)  $\Lambda(\lambda\delta)(\delta\delta\lambda)$  (0 imaginary frequencies)

| Center<br>Number | Atomic<br>Number | Coordinates (Angstroms) |           |           |
|------------------|------------------|-------------------------|-----------|-----------|
|                  |                  | X                       | Y         | Z         |
| 1                | 57               | 0.060965                | -0.146731 | -0.060266 |
| 2                | 7                | 2.656164                | -1.582708 | -0.298769 |
| 3                | 7                | -1.641564               | -0.104474 | 2.186616  |
| 4                | 8                | 1.137837                | -1.073503 | 2.185032  |
| 5                | 8                | -1.971502               | -2.031281 | 0.115540  |
| 6                | 8                | 0.183080                | -2.780412 | -1.125146 |
| 7                | 6                | -2.503282               | -1.302843 | 2.333403  |
| 8                | 6                | -3.063259               | -1.839875 | 1.021636  |
| 9                | 6                | -2.145805               | -3.107239 | -0.814114 |
| 10               | 6                | -1.035218               | -3.017941 | -1.847045 |
| 11               | 6                | 1.382063                | -3.078522 | -1.842480 |
| 12               | 1                | 1.490452                | -2.398975 | -2.699452 |
| 13               | 1                | 1.342524                | -4.106349 | -2.227715 |
| 14               | 6                | 2.521506                | -2.956982 | -0.842228 |
| 15               | 1                | 2.306336                | -3.640716 | -0.016582 |

|    |   |           |           |           |
|----|---|-----------|-----------|-----------|
| 16 | 1 | 3.462996  | -3.293438 | -1.303753 |
| 17 | 6 | 3.226144  | -1.597624 | 1.072285  |
| 18 | 1 | 3.581885  | -0.589803 | 1.298897  |
| 19 | 1 | 4.095668  | -2.273147 | 1.132370  |
| 20 | 6 | 3.508033  | -0.779700 | -1.214342 |
| 21 | 1 | 3.115389  | -0.911371 | -2.230226 |
| 22 | 1 | 4.539772  | -1.167219 | -1.226024 |
| 23 | 6 | 2.236625  | -1.999643 | 2.164204  |
| 24 | 1 | 1.847235  | -3.017830 | 2.029109  |
| 25 | 1 | 2.760273  | -1.963488 | 3.128075  |
| 26 | 6 | 0.373967  | -1.064559 | 3.403876  |
| 27 | 1 | 1.039464  | -0.829263 | 4.244626  |
| 28 | 1 | -0.039168 | -2.066858 | 3.577014  |
| 29 | 6 | -0.700137 | 0.021689  | 3.334768  |
| 30 | 1 | -0.202535 | 0.989227  | 3.229897  |
| 31 | 1 | -1.238172 | 0.019233  | 4.297027  |
| 32 | 6 | 3.524376  | 0.697540  | -0.878540 |
| 33 | 6 | 4.646214  | 1.493149  | -1.115338 |
| 34 | 1 | 5.545508  | 1.058865  | -1.541639 |
| 35 | 6 | 4.589993  | 2.850698  | -0.790708 |
| 36 | 1 | 5.446977  | 3.491751  | -0.976091 |
| 37 | 6 | 3.436989  | 3.362255  | -0.199844 |
| 38 | 1 | 3.342178  | 4.396896  | 0.109186  |
| 39 | 6 | 2.364593  | 2.499292  | 0.022581  |
| 40 | 6 | 1.110744  | 2.968232  | 0.756313  |
| 41 | 7 | 2.401801  | 1.203235  | -0.341230 |
| 42 | 6 | -2.451804 | 1.143968  | 2.061637  |
| 43 | 1 | -1.771055 | 1.983132  | 2.234801  |
| 44 | 1 | -3.237378 | 1.171408  | 2.831686  |
| 45 | 6 | -3.053590 | 1.354458  | 0.683190  |
| 46 | 6 | -4.282423 | 1.988030  | 0.485303  |
| 47 | 1 | -4.886741 | 2.291956  | 1.334640  |
| 48 | 6 | -4.711029 | 2.231757  | -0.822836 |
| 49 | 1 | -5.660440 | 2.729366  | -0.998694 |
| 50 | 6 | -3.916909 | 1.829082  | -1.896192 |
| 51 | 1 | -4.202862 | 1.986665  | -2.929859 |
| 52 | 6 | -2.705901 | 1.195251  | -1.619749 |
| 53 | 6 | -1.778622 | 0.699748  | -2.732742 |
| 54 | 7 | -2.298973 | 0.973853  | -0.359084 |
| 55 | 8 | -0.649077 | 0.191670  | -2.297411 |
| 56 | 8 | -2.145656 | 0.783699  | -3.892011 |
| 57 | 8 | 1.039663  | 4.129084  | 1.127009  |
| 58 | 8 | 0.227495  | 2.025847  | 0.939910  |
| 59 | 1 | -1.905415 | -2.102033 | 2.777578  |
| 60 | 1 | -3.337178 | -1.100955 | 3.024814  |
| 61 | 1 | -3.802341 | -1.171229 | 0.568296  |
| 62 | 1 | -3.550818 | -2.801819 | 1.226102  |
| 63 | 1 | -0.973844 | -3.964670 | -2.398764 |
| 64 | 1 | -1.201156 | -2.196546 | -2.552940 |
| 65 | 1 | -2.099206 | -4.058104 | -0.266649 |
| 66 | 1 | -3.119706 | -3.032549 | -1.314896 |

-----  
HF = -1709.8320387 Hartrees

Zero-point correction = 0.540866 Hartrees

Sum of electronic and thermal Enthalpies = -1709.257973 Hartrees

Sum of electronic and thermal Free Energies = -1709.352934 Hartrees

[La(bp15c5)]<sup>+</sup> (vacuum)  $\Lambda(\lambda\delta)(\lambda\delta\lambda)$  (0 imaginary frequencies)

| Center Number | Atomic Number | Coordinates (Angstroms) |           |           |
|---------------|---------------|-------------------------|-----------|-----------|
|               |               | X                       | Y         | Z         |
| 1             | 57            | 0.028120                | -0.110701 | -0.114021 |
| 2             | 7             | 2.696452                | -1.509297 | -0.335945 |
| 3             | 7             | -1.714354               | -0.122936 | 2.124628  |
| 4             | 8             | 1.038862                | -1.178708 | 2.107239  |
| 5             | 8             | -1.887281               | -2.202927 | 0.140297  |
| 6             | 8             | 0.296392                | -2.641918 | -1.279536 |
| 7             | 6             | -2.716616               | -1.221244 | 2.170749  |
| 8             | 1             | -2.990840               | -1.454185 | 3.211489  |
| 9             | 1             | -3.619249               | -0.856201 | 1.675404  |
| 10            | 6             | -2.320723               | -2.511641 | 1.466005  |
| 11            | 1             | -1.527096               | -3.065939 | 1.985554  |
| 12            | 1             | -3.205854               | -3.161220 | 1.430223  |
| 13            | 6             | -1.871626               | -3.346860 | -0.725532 |
| 14            | 1             | -2.887598               | -3.561349 | -1.081042 |
| 15            | 1             | -1.496586               | -4.216958 | -0.170254 |
| 16            | 6             | -0.940799               | -3.046240 | -1.883097 |
| 17            | 1             | -0.799211               | -3.952083 | -2.484844 |
| 18            | 1             | -1.313833               | -2.240480 | -2.524216 |
| 19            | 6             | 1.500701                | -2.939219 | -1.986119 |
| 20            | 1             | 1.635262                | -2.239041 | -2.821511 |
| 21            | 1             | 1.456973                | -3.955948 | -2.397633 |
| 22            | 6             | 2.614130                | -2.855840 | -0.952130 |
| 23            | 1             | 2.391876                | -3.587777 | -0.171254 |
| 24            | 1             | 3.575379                | -3.145915 | -1.404024 |
| 25            | 6             | 3.196839                | -1.573432 | 1.058785  |
| 26            | 1             | 3.504369                | -0.566380 | 1.350332  |
| 27            | 1             | 4.086061                | -2.221746 | 1.133553  |
| 28            | 6             | 3.570502                | -0.654784 | -1.177639 |
| 29            | 1             | 3.226172                | -0.755315 | -2.214365 |
| 30            | 1             | 4.609976                | -1.021108 | -1.158450 |
| 31            | 6             | 2.172962                | -2.062989 | 2.082924  |
| 32            | 1             | 1.828753                | -3.085830 | 1.880876  |
| 33            | 1             | 2.654414                | -2.058978 | 3.069030  |
| 34            | 6             | 0.245896                | -1.231644 | 3.308097  |
| 35            | 1             | 0.899193                | -1.074829 | 4.176114  |
| 36            | 1             | -0.206976               | -2.226013 | 3.406249  |
| 37            | 6             | -0.790939               | -0.109266 | 3.286603  |
| 38            | 1             | -0.255370               | 0.843551  | 3.255619  |
| 39            | 1             | -1.346822               | -0.152223 | 4.238060  |
| 40            | 6             | 3.543946                | 0.808160  | -0.790512 |
| 41            | 6             | 4.664422                | 1.624336  | -0.953776 |
| 42            | 1             | 5.585750                | 1.212885  | -1.354703 |
| 43            | 6             | 4.578843                | 2.969570  | -0.589637 |
| 44            | 1             | 5.434319                | 3.626175  | -0.718111 |
| 45            | 6             | 3.395506                | 3.446183  | -0.031150 |
| 46            | 1             | 3.273413                | 4.467812  | 0.309590  |
| 47            | 6             | 2.326456                | 2.563718  | 0.116843  |
| 48            | 6             | 1.043369                | 2.996290  | 0.817280  |
| 49            | 7             | 2.390921                | 1.279927  | -0.287259 |
| 50            | 6             | -2.444189               | 1.181817  | 2.045249  |
| 51            | 1             | -1.708590               | 1.977155  | 2.192444  |
| 52            | 1             | -3.203453               | 1.252070  | 2.837932  |
| 53            | 6             | -3.074716               | 1.396662  | 0.682024  |
| 54            | 6             | -4.296608               | 2.046505  | 0.501374  |
| 55            | 1             | -4.875585               | 2.374033  | 1.359376  |
| 56            | 6             | -4.751732               | 2.276807  | -0.800600 |

|    |   |           |          |           |
|----|---|-----------|----------|-----------|
| 57 | 1 | -5.697406 | 2.785803 | -0.962709 |
| 58 | 6 | -3.987527 | 1.847438 | -1.884405 |
| 59 | 1 | -4.292199 | 1.996493 | -2.913872 |
| 60 | 6 | -2.780377 | 1.198756 | -1.624876 |
| 61 | 6 | -1.875716 | 0.693770 | -2.750326 |
| 62 | 7 | -2.351163 | 0.983966 | -0.371211 |
| 63 | 8 | -0.736672 | 0.190254 | -2.331096 |
| 64 | 8 | -2.258802 | 0.772860 | -3.904284 |
| 65 | 8 | 0.950908  | 4.137731 | 1.239926  |
| 66 | 8 | 0.158705  | 2.044051 | 0.919460  |

-----  
 HF = -1709.828853 Hartrees

Zero-point correction = 0.540623 Hartrees

Sum of electronic and thermal Enthalpies = -1709.254911 Hartrees

Sum of electronic and thermal Free Energies = -1709.350586 Hartrees

[La(bp15c5)]<sup>+</sup> (vacuum)  $\Lambda(\delta\delta)(\lambda\delta\lambda)$  (0 imaginary frequencies)

| Center<br>Number | Atomic<br>Number | Coordinates (Angstroms) |           |           |
|------------------|------------------|-------------------------|-----------|-----------|
|                  |                  | X                       | Y         | Z         |
| 1                | 57               | 0.026440                | -0.218798 | -0.130044 |
| 2                | 7                | 2.848482                | -1.273781 | -0.160089 |
| 3                | 7                | -1.892953               | -0.620640 | 1.970581  |
| 4                | 8                | 0.939889                | -1.310422 | 2.101119  |
| 5                | 8                | -1.692457               | -2.445597 | -0.269234 |
| 6                | 8                | 0.691654                | -2.555824 | -1.428986 |
| 7                | 6                | -2.918373               | -1.640421 | 1.624221  |
| 8                | 1                | -3.472719               | -1.959466 | 2.520836  |
| 9                | 1                | -3.638201               | -1.175908 | 0.947736  |
| 10               | 6                | -2.358005               | -2.865372 | 0.926735  |
| 11               | 1                | -1.652276               | -3.427792 | 1.555454  |
| 12               | 1                | -3.191378               | -3.534254 | 0.674017  |
| 13               | 6                | -1.443680               | -3.524284 | -1.179609 |
| 14               | 1                | -2.377530               | -3.819051 | -1.676093 |
| 15               | 1                | -1.048542               | -4.385424 | -0.623488 |
| 16               | 6                | -0.418433               | -3.055901 | -2.194056 |
| 17               | 1                | -0.106566               | -3.900090 | -2.819488 |
| 18               | 1                | -0.803449               | -2.254466 | -2.834429 |
| 19               | 6                | 2.007996                | -2.841345 | -1.903986 |
| 20               | 1                | 2.251319                | -2.194890 | -2.757455 |
| 21               | 1                | 2.068991                | -3.883926 | -2.241472 |
| 22               | 6                | 2.943900                | -2.641173 | -0.718244 |
| 23               | 1                | 2.650389                | -3.355833 | 0.054814  |
| 24               | 1                | 3.977374                | -2.885334 | -1.013028 |
| 25               | 6                | 3.261014                | -1.220928 | 1.264879  |
| 26               | 1                | 3.383017                | -0.168779 | 1.531073  |
| 27               | 1                | 4.238211                | -1.712054 | 1.416186  |
| 28               | 6                | 3.674968                | -0.355418 | -0.983036 |
| 29               | 1                | 3.424145                | -0.533780 | -2.035325 |
| 30               | 1                | 4.746726                | -0.591340 | -0.875562 |
| 31               | 6                | 2.266465                | -1.852612 | 2.245003  |
| 32               | 1                | 2.187501                | -2.936073 | 2.104624  |
| 33               | 1                | 2.632951                | -1.676987 | 3.262044  |
| 34               | 6                | 0.310038                | -0.656463 | 3.233000  |
| 35               | 6                | -1.177835               | -1.003519 | 3.221020  |
| 36               | 6                | 3.444214                | 1.105941  | -0.659045 |
| 37               | 6                | 4.438399                | 2.068834  | -0.841945 |
| 38               | 1                | 5.410227                | 1.784935  | -1.234489 |
| 39               | 6                | 4.161599                | 3.394875  | -0.502440 |

|    |   |           |           |           |
|----|---|-----------|-----------|-----------|
| 40 | 1 | 4.914305  | 4.164037  | -0.648718 |
| 41 | 6 | 2.927732  | 3.708932  | 0.064615  |
| 42 | 1 | 2.669279  | 4.707539  | 0.397728  |
| 43 | 6 | 1.998164  | 2.685239  | 0.237384  |
| 44 | 6 | 0.688883  | 2.912052  | 0.984904  |
| 45 | 7 | 2.238554  | 1.422097  | -0.162861 |
| 46 | 6 | -2.563889 | 0.706991  | 2.096531  |
| 47 | 1 | -1.820503 | 1.425958  | 2.451616  |
| 48 | 1 | -3.383779 | 0.655210  | 2.829352  |
| 49 | 6 | -3.087802 | 1.200426  | 0.757997  |
| 50 | 6 | -4.246177 | 1.968904  | 0.635863  |
| 51 | 1 | -4.835846 | 2.215771  | 1.513394  |
| 52 | 6 | -4.627236 | 2.417122  | -0.632445 |
| 53 | 1 | -5.522724 | 3.020896  | -0.747541 |
| 54 | 6 | -3.857115 | 2.079890  | -1.744518 |
| 55 | 1 | -4.109710 | 2.393782  | -2.750759 |
| 56 | 6 | -2.712818 | 1.308370  | -1.544573 |
| 57 | 6 | -1.795413 | 0.906353  | -2.701417 |
| 58 | 7 | -2.353047 | 0.886569  | -0.321500 |
| 59 | 8 | -0.690185 | 0.305474  | -2.319146 |
| 60 | 8 | -2.134530 | 1.154200  | -3.844669 |
| 61 | 8 | 0.405463  | 4.035085  | 1.370795  |
| 62 | 8 | 0.005563  | 1.815974  | 1.171149  |
| 63 | 1 | -1.265934 | -2.086728 | 3.345523  |
| 64 | 1 | -1.652586 | -0.540095 | 4.098568  |
| 65 | 1 | 0.753532  | -1.026356 | 4.163846  |
| 66 | 1 | 0.476683  | 0.422209  | 3.151404  |

-----  
 HF = -1709.8233795 Hartrees

Zero-point correction = 0.540340 Hartrees

Sum of electronic and thermal Enthalpies = -1709.249661 Hartrees

Sum of electronic and thermal Free Energies = -1709.345637 Hartrees

[La(bp15c5)]<sup>+</sup> (vacuum)  $\Lambda(\lambda\delta)(\delta\delta\delta)$  (0 imaginary frequencies)

| Center<br>Number | Atomic<br>Number | Coordinates (Angstroms) |           |           |
|------------------|------------------|-------------------------|-----------|-----------|
|                  |                  | X                       | Y         | Z         |
| 1                | 57               | 0.052357                | -0.071826 | -0.153494 |
| 2                | 7                | 2.661917                | -1.579706 | -0.436893 |
| 3                | 7                | -1.557190               | -0.204659 | 2.191699  |
| 4                | 8                | 1.198274                | -1.160944 | 2.063159  |
| 5                | 8                | -1.793102               | -2.138656 | 0.087941  |
| 6                | 8                | 0.262792                | -2.446730 | -1.598049 |
| 7                | 6                | -2.366119               | -1.442362 | 2.314574  |
| 8                | 6                | -2.895511               | -1.990278 | 0.995317  |
| 9                | 6                | -1.986685               | -3.144220 | -0.918565 |
| 10               | 6                | -1.027353               | -2.852528 | -2.069155 |
| 11               | 6                | 1.066398                | -3.448966 | -0.976347 |
| 12               | 6                | 2.504085                | -2.943570 | -1.011722 |
| 13               | 6                | 3.274173                | -1.606998 | 0.910480  |
| 14               | 1                | 3.614119                | -0.597124 | 1.149702  |
| 15               | 1                | 4.158809                | -2.265579 | 0.932512  |
| 16               | 6                | 3.461105                | -0.732192 | -1.365911 |
| 17               | 1                | 2.980681                | -0.795940 | -2.349571 |
| 18               | 1                | 4.484252                | -1.123239 | -1.482293 |
| 19               | 6                | 2.327169                | -2.047738 | 2.019881  |
| 20               | 1                | 1.976708                | -3.081036 | 1.891091  |
| 21               | 1                | 2.867856                | -1.995426 | 2.973480  |
| 22               | 6                | 0.505263                | -1.156355 | 3.321543  |

|    |   |           |           |           |
|----|---|-----------|-----------|-----------|
| 23 | 6 | -0.582165 | -0.086432 | 3.309799  |
| 24 | 6 | 3.523588  | 0.721369  | -0.941496 |
| 25 | 6 | 4.668512  | 1.496566  | -1.126746 |
| 26 | 1 | 5.556263  | 1.062007  | -1.575870 |
| 27 | 6 | 4.651558  | 2.833752  | -0.720851 |
| 28 | 1 | 5.528233  | 3.458421  | -0.864959 |
| 29 | 6 | 3.512419  | 3.343466  | -0.103116 |
| 30 | 1 | 3.447913  | 4.359508  | 0.268729  |
| 31 | 6 | 2.412190  | 2.502149  | 0.062383  |
| 32 | 6 | 1.169714  | 2.967603  | 0.819923  |
| 33 | 7 | 2.413307  | 1.230199  | -0.378909 |
| 34 | 6 | -2.415024 | 1.015637  | 2.168389  |
| 35 | 1 | -1.754042 | 1.871287  | 2.340255  |
| 36 | 1 | -3.152730 | 0.982586  | 2.984201  |
| 37 | 6 | -3.102061 | 1.261079  | 0.839904  |
| 38 | 6 | -4.365550 | 1.846524  | 0.740616  |
| 39 | 1 | -4.936057 | 2.075959  | 1.635401  |
| 40 | 6 | -4.872544 | 2.142181  | -0.528184 |
| 41 | 1 | -5.850499 | 2.604013  | -0.628367 |
| 42 | 6 | -4.115786 | 1.839523  | -1.659050 |
| 43 | 1 | -4.456808 | 2.044743  | -2.667272 |
| 44 | 6 | -2.866298 | 1.246791  | -1.478910 |
| 45 | 6 | -1.973041 | 0.871197  | -2.661629 |
| 46 | 7 | -2.384907 | 0.968666  | -0.256076 |
| 47 | 8 | -0.807013 | 0.387041  | -2.308775 |
| 48 | 8 | -2.395850 | 1.018530  | -3.795437 |
| 49 | 8 | 1.147708  | 4.097215  | 1.280939  |
| 50 | 8 | 0.242241  | 2.054844  | 0.922750  |
| 51 | 1 | 3.157036  | -3.665099 | -0.500651 |
| 52 | 1 | 2.816622  | -2.919741 | -2.059178 |
| 53 | 1 | 0.997922  | -4.391750 | -1.535555 |
| 54 | 1 | 0.717340  | -3.635164 | 0.049076  |
| 55 | 1 | -0.937614 | -3.732443 | -2.719199 |
| 56 | 1 | -1.373118 | -2.004173 | -2.661898 |
| 57 | 1 | -1.812356 | -4.130578 | -0.467634 |
| 58 | 1 | -3.016119 | -3.117463 | -1.297430 |
| 59 | 1 | -3.348746 | -2.970609 | 1.190636  |
| 60 | 1 | -3.653863 | -1.345103 | 0.540524  |
| 61 | 1 | -1.739481 | -2.220418 | 2.755120  |
| 62 | 1 | -3.214221 | -1.287514 | 3.000088  |
| 63 | 1 | -0.102816 | 0.890507  | 3.206278  |
| 64 | 1 | -1.087962 | -0.112844 | 4.289139  |
| 65 | 1 | 1.212593  | -0.909986 | 4.124255  |
| 66 | 1 | 0.115220  | -2.162784 | 3.522827  |

-----  
 HF = -1709.8261075 Hartrees

Zero-point correction = 0.541243 Hartrees

Sum of electronic and thermal Enthalpies = -1709.251707 Hartrees

Sum of electronic and thermal Free Energies = -1709.346662 Hartrees

[La(bp15c5)]<sup>+</sup> (vacuum)  $\Lambda(\lambda\lambda)(\delta\delta\lambda)$

(0 imaginary frequencies)

| Center<br>Number | Atomic<br>Number | Coordinates (Angstroms) |           |           |
|------------------|------------------|-------------------------|-----------|-----------|
|                  |                  | X                       | Y         | Z         |
| 1                | 57               | -0.010408               | 0.176735  | -0.099994 |
| 2                | 7                | -2.501610               | 1.900500  | -0.001558 |
| 3                | 7                | 1.358583                | -0.763869 | 2.159276  |
| 4                | 8                | -1.343488               | 0.265573  | 2.201541  |
| 5                | 8                | 1.964494                | 1.766462  | 0.980730  |

|    |   |           |           |           |
|----|---|-----------|-----------|-----------|
| 6  | 8 | 0.108224  | 2.965319  | -0.373999 |
| 7  | 6 | 2.071831  | 0.314038  | 2.883765  |
| 8  | 6 | 2.854964  | 1.258593  | 1.979545  |
| 9  | 6 | 2.317191  | 3.058088  | 0.465597  |
| 10 | 6 | 1.439079  | 3.344502  | -0.743243 |
| 11 | 6 | -0.945859 | 3.445484  | -1.213889 |
| 12 | 1 | -0.972481 | 2.874212  | -2.152835 |
| 13 | 1 | -0.779010 | 4.501771  | -1.462396 |
| 14 | 6 | -2.216859 | 3.315347  | -0.388903 |
| 15 | 1 | -2.072623 | 3.907786  | 0.517237  |
| 16 | 1 | -3.064522 | 3.757249  | -0.931506 |
| 17 | 6 | -3.021346 | 1.831566  | 1.391513  |
| 18 | 6 | -3.438886 | 1.335261  | -1.004245 |
| 19 | 1 | -3.064000 | 1.630139  | -1.992933 |
| 20 | 1 | -4.435544 | 1.793625  | -0.898701 |
| 21 | 6 | -2.758310 | 0.541120  | 2.167973  |
| 22 | 6 | -0.864591 | -0.435052 | 3.367773  |
| 23 | 1 | -1.665718 | -1.057554 | 3.782603  |
| 24 | 1 | -0.592748 | 0.307918  | 4.127078  |
| 25 | 6 | 0.291111  | -1.370005 | 3.003045  |
| 26 | 1 | -0.111473 | -2.206678 | 2.428904  |
| 27 | 1 | 0.704218  | -1.769324 | 3.944279  |
| 28 | 6 | -3.571346 | -0.171551 | -0.993416 |
| 29 | 6 | -4.785609 | -0.791192 | -1.293342 |
| 30 | 1 | -5.669785 | -0.192376 | -1.489357 |
| 31 | 6 | -4.839678 | -2.185930 | -1.340884 |
| 32 | 1 | -5.771133 | -2.689300 | -1.582944 |
| 33 | 6 | -3.690917 | -2.917646 | -1.052879 |
| 34 | 1 | -3.667557 | -4.001180 | -1.044312 |
| 35 | 6 | -2.519810 | -2.226841 | -0.741078 |
| 36 | 6 | -1.261762 | -2.981166 | -0.317669 |
| 37 | 7 | -2.458053 | -0.880467 | -0.736585 |
| 38 | 6 | 2.286665  | -1.844669 | 1.709735  |
| 39 | 1 | 1.669779  | -2.725445 | 1.507455  |
| 40 | 1 | 2.991411  | -2.102687 | 2.514331  |
| 41 | 6 | 3.036891  | -1.551628 | 0.423031  |
| 42 | 6 | 4.305281  | -2.077094 | 0.163871  |
| 43 | 1 | 4.831090  | -2.644056 | 0.926095  |
| 44 | 6 | 4.874268  | -1.872650 | -1.095964 |
| 45 | 1 | 5.856186  | -2.278884 | -1.320675 |
| 46 | 6 | 4.174133  | -1.146197 | -2.058591 |
| 47 | 1 | 4.565193  | -0.956415 | -3.051511 |
| 48 | 6 | 2.918241  | -0.643196 | -1.721790 |
| 49 | 6 | 2.089044  | 0.180552  | -2.709726 |
| 50 | 7 | 2.378387  | -0.846859 | -0.508322 |
| 51 | 8 | 0.909459  | 0.529008  | -2.252489 |
| 52 | 8 | 2.569041  | 0.467716  | -3.792862 |
| 53 | 8 | -1.298078 | -4.200904 | -0.261179 |
| 54 | 8 | -0.260346 | -2.207823 | -0.010921 |
| 55 | 1 | 1.329941  | 0.914561  | 3.416866  |
| 56 | 1 | 2.755988  | -0.106885 | 3.638508  |
| 57 | 1 | 3.708909  | 0.770681  | 1.496105  |
| 58 | 1 | 3.235019  | 2.085178  | 2.593716  |
| 59 | 1 | -3.121352 | 0.702711  | 3.190210  |
| 60 | 1 | -3.278189 | -0.326756 | 1.751398  |
| 61 | 1 | -4.107305 | 2.021418  | 1.419246  |
| 62 | 1 | -2.540145 | 2.634718  | 1.955174  |
| 63 | 1 | 1.481065  | 4.416529  | -0.975726 |
| 64 | 1 | 1.751573  | 2.775203  | -1.625036 |
| 65 | 1 | 2.155329  | 3.805387  | 1.253430  |
| 66 | 1 | 3.373223  | 3.078213  | 0.167339  |



-----  
 HF = -1709.8238988 Hartrees  
 Zero-point correction = 0.540883 Hartrees  
 Sum of electronic and thermal Enthalpies = -1709.249714 Hartrees  
 Sum of electronic and thermal Free Energies = -1709.345333 Hartrees

[La(bp15c5)]<sup>+</sup> (vacuum)  $\Lambda(\delta\lambda)(\lambda\delta\lambda)$  (0 imaginary frequencies)

| Center<br>Number | Atomic<br>Number | Coordinates (Angstroms) |           |           |
|------------------|------------------|-------------------------|-----------|-----------|
|                  |                  | X                       | Y         | Z         |
| 1                | 57               | -0.010125               | -0.258299 | -0.115692 |
| 2                | 7                | 2.785717                | -1.527884 | -0.089976 |
| 3                | 7                | -1.811986               | -0.333964 | 2.095582  |
| 4                | 8                | 1.125076                | -0.786571 | 2.278551  |
| 5                | 8                | -1.782939               | -2.412422 | 0.097232  |
| 6                | 8                | 0.479990                | -2.686963 | -1.249617 |
| 7                | 6                | -2.864114               | -1.378023 | 1.965864  |
| 8                | 1                | -3.338628               | -1.577275 | 2.939282  |
| 9                | 1                | -3.638572               | -0.990811 | 1.300992  |
| 10               | 6                | -2.366531               | -2.686152 | 1.376526  |
| 11               | 1                | -1.624922               | -3.188988 | 2.014474  |
| 12               | 1                | -3.222457               | -3.363347 | 1.258715  |
| 13               | 6                | -1.637251               | -3.576705 | -0.727405 |
| 14               | 6                | -0.701818               | -3.221784 | -1.867741 |
| 15               | 6                | 1.751856                | -3.027686 | -1.804808 |
| 16               | 1                | 1.974582                | -2.381091 | -2.663822 |
| 17               | 1                | 1.742702                | -4.066578 | -2.157783 |
| 18               | 6                | 2.756963                | -2.897742 | -0.668388 |
| 19               | 1                | 2.448554                | -3.595684 | 0.113715  |
| 20               | 1                | 3.753843                | -3.212606 | -1.016102 |
| 21               | 6                | 3.222659                | -1.557382 | 1.335161  |
| 22               | 6                | 3.661378                | -0.689038 | -0.943785 |
| 23               | 1                | 3.412235                | -0.910351 | -1.988624 |
| 24               | 1                | 4.717076                | -0.977703 | -0.811431 |
| 25               | 6                | 2.547887                | -0.558983 | 2.276959  |
| 26               | 6                | 0.411384                | -0.036748 | 3.288620  |
| 27               | 6                | -1.026052               | -0.543304 | 3.342571  |
| 28               | 6                | 3.516143                | 0.801589  | -0.734155 |
| 29               | 6                | 4.587922                | 1.670304  | -0.951501 |
| 30               | 1                | 5.556508                | 1.278520  | -1.247167 |
| 31               | 6                | 4.391016                | 3.041689  | -0.781682 |
| 32               | 1                | 5.205682                | 3.737514  | -0.959639 |
| 33               | 6                | 3.148612                | 3.498504  | -0.347346 |
| 34               | 1                | 2.939149                | 4.544341  | -0.154394 |
| 35               | 6                | 2.139367                | 2.564560  | -0.120789 |
| 36               | 6                | 0.813284                | 2.976713  | 0.507399  |
| 37               | 7                | 2.308856                | 1.247422  | -0.353196 |
| 38               | 6                | -2.467535               | 1.007212  | 2.074339  |
| 39               | 1                | -1.703255               | 1.759773  | 2.286968  |
| 40               | 1                | -3.244854               | 1.066231  | 2.851519  |
| 41               | 6                | -3.057962               | 1.323975  | 0.710852  |
| 42               | 6                | -4.214122               | 2.087192  | 0.544496  |
| 43               | 1                | -4.762307               | 2.449078  | 1.408897  |
| 44               | 6                | -4.644961               | 2.383457  | -0.752214 |
| 45               | 1                | -5.539699               | 2.980333  | -0.903131 |
| 46               | 6                | -3.922273               | 1.908202  | -1.845337 |
| 47               | 1                | -4.210584               | 2.106443  | -2.871219 |
| 48               | 6                | -2.777504               | 1.150684  | -1.599829 |
| 49               | 6                | -1.903731               | 0.612808  | -2.733788 |

|    |   |           |           |           |
|----|---|-----------|-----------|-----------|
| 50 | 7 | -2.374473 | 0.867891  | -0.350790 |
| 51 | 8 | -0.785770 | 0.056183  | -2.322622 |
| 52 | 8 | -2.283635 | 0.724304  | -3.885604 |
| 53 | 8 | 0.590193  | 4.159121  | 0.713596  |
| 54 | 8 | 0.050345  | 1.963666  | 0.811037  |
| 55 | 1 | -0.989593 | -1.618815 | 3.541037  |
| 56 | 1 | -1.529625 | -0.074662 | 4.202021  |
| 57 | 1 | 0.882093  | -0.213779 | 4.264126  |
| 58 | 1 | 0.466496  | 1.031265  | 3.050382  |
| 59 | 1 | 2.937941  | -0.738368 | 3.287913  |
| 60 | 1 | 2.750526  | 0.481719  | 2.008514  |
| 61 | 1 | 4.310823  | -1.408630 | 1.415777  |
| 62 | 1 | 3.009992  | -2.555303 | 1.727851  |
| 63 | 1 | -0.462394 | -4.122365 | -2.444345 |
| 64 | 1 | -1.129298 | -2.465668 | -2.535026 |
| 65 | 1 | -1.207736 | -4.393495 | -0.131718 |
| 66 | 1 | -2.617754 | -3.889513 | -1.109358 |

-----  
 HF = -1709.8240453 Hartrees

Zero-point correction = 0.540831 Hartrees

Sum of electronic and thermal Enthalpies = -1709.250054 Hartrees

Sum of electronic and thermal Free Energies = -1709.345213 Hartrees

[La(bp15c5)]<sup>+</sup> (vacuum)  $\Lambda(\lambda\delta)(\lambda\lambda\lambda)$  (0 imaginary frequencies)

| Center<br>Number | Atomic<br>Number | Coordinates (Angstroms) |           |           |
|------------------|------------------|-------------------------|-----------|-----------|
|                  |                  | X                       | Y         | Z         |
| 1                | 57               | 0.007297                | -0.064206 | -0.164273 |
| 2                | 7                | 2.701314                | -1.458520 | -0.358218 |
| 3                | 7                | -1.681550               | -0.219028 | 2.131837  |
| 4                | 8                | 1.062976                | -1.200646 | 2.071822  |
| 5                | 8                | -1.837393               | -2.133258 | 0.036748  |
| 6                | 8                | 0.310367                | -2.553084 | -1.590443 |
| 7                | 6                | -2.561593               | -1.416055 | 2.188395  |
| 8                | 1                | -2.726355               | -1.734861 | 3.228989  |
| 9                | 1                | -3.534493               | -1.132260 | 1.779491  |
| 10               | 6                | -2.069032               | -2.604105 | 1.367241  |
| 11               | 1                | -1.155670               | -3.056128 | 1.774215  |
| 12               | 1                | -2.850791               | -3.374532 | 1.360044  |
| 13               | 6                | -1.914287               | -3.093034 | -1.026394 |
| 14               | 6                | -0.545383               | -3.666966 | -1.336913 |
| 15               | 6                | 1.611857                | -2.871547 | -2.094528 |
| 16               | 1                | 1.821870                | -2.147532 | -2.887611 |
| 17               | 1                | 1.612987                | -3.868606 | -2.549849 |
| 18               | 6                | 2.634511                | -2.807840 | -0.966407 |
| 19               | 1                | 2.337730                | -3.523565 | -0.194031 |
| 20               | 1                | 3.623746                | -3.127939 | -1.333729 |
| 21               | 6                | 3.226442                | -1.520989 | 1.026384  |
| 22               | 1                | 3.514779                | -0.509591 | 1.321152  |
| 23               | 1                | 4.131811                | -2.149121 | 1.079738  |
| 24               | 6                | 3.558979                | -0.583829 | -1.198008 |
| 25               | 1                | 3.212068                | -0.670489 | -2.234287 |
| 26               | 1                | 4.603061                | -0.937274 | -1.188896 |
| 27               | 6                | 2.229204                | -2.038092 | 2.058924  |
| 28               | 1                | 1.927456                | -3.078361 | 1.875351  |
| 29               | 1                | 2.714185                | -2.003099 | 3.042633  |
| 30               | 6                | 0.323370                | -1.221304 | 3.305953  |
| 31               | 1                | 1.005910                | -1.010652 | 4.139225  |
| 32               | 1                | -0.099223               | -2.221947 | 3.466542  |

|    |   |           |           |           |
|----|---|-----------|-----------|-----------|
| 33 | 6 | -0.742600 | -0.132027 | 3.276017  |
| 34 | 1 | -0.241762 | 0.836887  | 3.203113  |
| 35 | 1 | -1.281451 | -0.165598 | 4.237834  |
| 36 | 6 | 3.516202  | 0.873748  | -0.785894 |
| 37 | 6 | 4.626525  | 1.705977  | -0.934607 |
| 38 | 1 | 5.551740  | 1.314391  | -1.346350 |
| 39 | 6 | 4.526145  | 3.042110  | -0.540660 |
| 40 | 1 | 5.373666  | 3.711056  | -0.657697 |
| 41 | 6 | 3.340249  | 3.493156  | 0.033489  |
| 42 | 1 | 3.209202  | 4.505327  | 0.398250  |
| 43 | 6 | 2.281033  | 2.596017  | 0.165166  |
| 44 | 6 | 0.996438  | 2.997736  | 0.884528  |
| 45 | 7 | 2.359658  | 1.323381  | -0.270080 |
| 46 | 6 | -2.517516 | 1.019440  | 2.085145  |
| 47 | 1 | -1.845319 | 1.866396  | 2.251074  |
| 48 | 1 | -3.270623 | 1.010923  | 2.886631  |
| 49 | 6 | -3.176135 | 1.229378  | 0.735562  |
| 50 | 6 | -4.456604 | 1.765224  | 0.590673  |
| 51 | 1 | -5.061961 | 1.983700  | 1.465073  |
| 52 | 6 | -4.935499 | 2.029010  | -0.696579 |
| 53 | 1 | -5.927106 | 2.451348  | -0.830953 |
| 54 | 6 | -4.132741 | 1.748654  | -1.800590 |
| 55 | 1 | -4.448982 | 1.935728  | -2.820347 |
| 56 | 6 | -2.867468 | 1.205246  | -1.576751 |
| 57 | 6 | -1.915483 | 0.872703  | -2.728196 |
| 58 | 7 | -2.418065 | 0.952021  | -0.337538 |
| 59 | 8 | -0.740511 | 0.442127  | -2.331977 |
| 60 | 8 | -2.297998 | 1.013946  | -3.876113 |
| 61 | 8 | 0.899130  | 4.126327  | 1.338593  |
| 62 | 8 | 0.118840  | 2.036026  | 0.968812  |
| 63 | 1 | -0.161208 | -4.270977 | -0.500778 |
| 64 | 1 | -0.610060 | -4.308646 | -2.225619 |
| 65 | 1 | -2.289619 | -2.547720 | -1.896286 |
| 66 | 1 | -2.623968 | -3.889271 | -0.772591 |

-----  
 HF = -1709.8239253 Hartrees

Zero-point correction = 0.540615 Hartrees

Sum of electronic and thermal Enthalpies = -1709.249955 Hartrees

Sum of electronic and thermal Free Energies = -1709.345892 Hartrees

[La(bp15c5)]<sup>+</sup> (vacuum)  $\Lambda(\lambda\lambda)(\delta\delta\delta)$  (0 imaginary frequencies)

| Center<br>Number | Atomic<br>Number | Coordinates (Angstroms) |           |           |
|------------------|------------------|-------------------------|-----------|-----------|
|                  |                  | X                       | Y         | Z         |
| 1                | 57               | -0.038913               | 0.127121  | -0.203677 |
| 2                | 7                | -2.685401               | 1.503563  | -0.525926 |
| 3                | 7                | 1.543533                | -0.100114 | 2.181467  |
| 4                | 8                | -1.248213               | 0.876833  | 2.040226  |
| 5                | 8                | 1.852154                | 2.083580  | 0.435569  |
| 6                | 8                | -0.259556               | 3.001893  | -0.865225 |
| 7                | 6                | 2.420758                | 1.055736  | 2.489549  |
| 8                | 6                | 2.977012                | 1.740347  | 1.249222  |
| 9                | 6                | 2.109529                | 2.973865  | -0.660866 |
| 10               | 6                | 0.885604                | 3.854145  | -0.789479 |
| 11               | 6                | -1.482476               | 3.725870  | -0.771149 |
| 12               | 6                | -2.615148               | 2.818214  | -1.211072 |
| 13               | 6                | -3.250366               | 1.587981  | 0.849085  |
| 14               | 1                | -3.711829               | 0.623504  | 1.074466  |
| 15               | 1                | -4.049616               | 2.346149  | 0.892430  |

|    |   |           |           |           |
|----|---|-----------|-----------|-----------|
| 16 | 6 | -3.547646 | 0.629029  | -1.372177 |
| 17 | 1 | -3.157165 | 0.684407  | -2.395305 |
| 18 | 1 | -4.580269 | 1.011110  | -1.407402 |
| 19 | 6 | -2.269829 | 1.885203  | 1.986962  |
| 20 | 1 | -1.796589 | 2.870561  | 1.903448  |
| 21 | 1 | -2.842700 | 1.868160  | 2.923529  |
| 22 | 6 | -0.548099 | 0.797916  | 3.296818  |
| 23 | 1 | -1.263481 | 0.540220  | 4.088369  |
| 24 | 1 | -0.128122 | 1.784211  | 3.533120  |
| 25 | 6 | 0.517078  | -0.298037 | 3.238826  |
| 26 | 1 | 0.023511  | -1.250743 | 3.031412  |
| 27 | 1 | 0.973749  | -0.367984 | 4.239892  |
| 28 | 6 | -3.553125 | -0.818007 | -0.939827 |
| 29 | 6 | -4.694761 | -1.612467 | -1.054991 |
| 30 | 1 | -5.619762 | -1.187027 | -1.431952 |
| 31 | 6 | -4.623309 | -2.955745 | -0.679470 |
| 32 | 1 | -5.495463 | -3.596546 | -0.769860 |
| 33 | 6 | -3.428178 | -3.450556 | -0.165017 |
| 34 | 1 | -3.310671 | -4.472574 | 0.176216  |
| 35 | 6 | -2.337425 | -2.587123 | -0.065210 |
| 36 | 6 | -1.034885 | -3.043225 | 0.576328  |
| 37 | 7 | -2.392069 | -1.304357 | -0.470346 |
| 38 | 6 | 2.347597  | -1.342990 | 1.997156  |
| 39 | 1 | 1.653070  | -2.186634 | 2.034636  |
| 40 | 1 | 3.078066  | -1.454641 | 2.812460  |
| 41 | 6 | 3.046130  | -1.419115 | 0.651098  |
| 42 | 6 | 4.280635  | -2.049130 | 0.481023  |
| 43 | 1 | 4.813750  | -2.449681 | 1.337801  |
| 44 | 6 | 4.809297  | -2.162612 | -0.807983 |
| 45 | 1 | 5.765608  | -2.654306 | -0.961064 |
| 46 | 6 | 4.103571  | -1.639952 | -1.890799 |
| 47 | 1 | 4.464394  | -1.697513 | -2.911270 |
| 48 | 6 | 2.880660  | -1.017718 | -1.642445 |
| 49 | 6 | 2.038388  | -0.416418 | -2.770558 |
| 50 | 7 | 2.378923  | -0.915614 | -0.400221 |
| 51 | 8 | 0.888065  | 0.073001  | -2.367546 |
| 52 | 8 | 2.476493  | -0.421596 | -3.906982 |
| 53 | 8 | -0.952650 | -4.176233 | 1.024810  |
| 54 | 8 | -0.117356 | -2.118777 | 0.609763  |
| 55 | 1 | 0.798903  | 4.506036  | 0.091522  |
| 56 | 1 | 0.952556  | 4.480313  | -1.689300 |
| 57 | 1 | 2.284176  | 2.394254  | -1.574340 |
| 58 | 1 | 2.989737  | 3.593998  | -0.455625 |
| 59 | 1 | -3.567321 | 3.365779  | -1.111383 |
| 60 | 1 | -2.466391 | 2.617512  | -2.275763 |
| 61 | 1 | -1.610496 | 4.114723  | 0.248617  |
| 62 | 1 | -1.462365 | 4.591069  | -1.448469 |
| 63 | 1 | 3.506771  | 2.653427  | 1.552049  |
| 64 | 1 | 3.672463  | 1.106580  | 0.691072  |
| 65 | 1 | 3.252337  | 0.753250  | 3.144406  |
| 66 | 1 | 1.838719  | 1.801264  | 3.035980  |

-----  
HF = -1709.8236577 Hartrees

Zero-point correction = 0.541155 Hartrees

Sum of electronic and thermal Enthalpies = -1709.249274 Hartrees

Sum of electronic and thermal Free Energies = -1709.344626 Hartrees

[La(bp15c5)]<sup>+</sup> (vacuum)  $\Lambda(\lambda\delta)(\delta\lambda\delta)$  (0 imaginary frequencies)

| Center Number | Atomic Number | Coordinates (Angstroms) |           |           |
|---------------|---------------|-------------------------|-----------|-----------|
|               |               | X                       | Y         | Z         |
| 1             | 57            | -0.038913               | 0.127121  | -0.203677 |
| 2             | 7             | -2.685401               | 1.503563  | -0.525926 |
| 3             | 7             | 1.543533                | -0.100114 | 2.181467  |
| 4             | 8             | -1.248213               | 0.876833  | 2.040226  |
| 5             | 8             | 1.852154                | 2.083580  | 0.435569  |
| 6             | 8             | -0.259556               | 3.001893  | -0.865225 |
| 7             | 6             | 2.420758                | 1.055736  | 2.489549  |
| 8             | 6             | 2.977012                | 1.740347  | 1.249222  |
| 9             | 6             | 2.109529                | 2.973865  | -0.660866 |
| 10            | 6             | 0.885604                | 3.854145  | -0.789479 |
| 11            | 6             | -1.482476               | 3.725870  | -0.771149 |
| 12            | 6             | -2.615148               | 2.818214  | -1.211072 |
| 13            | 6             | -3.250366               | 1.587981  | 0.849085  |
| 14            | 1             | -3.711829               | 0.623504  | 1.074466  |
| 15            | 1             | -4.049616               | 2.346149  | 0.892430  |
| 16            | 6             | -3.547646               | 0.629029  | -1.372177 |
| 17            | 1             | -3.157165               | 0.684407  | -2.395305 |
| 18            | 1             | -4.580269               | 1.011110  | -1.407402 |
| 19            | 6             | -2.269829               | 1.885203  | 1.986962  |
| 20            | 1             | -1.796589               | 2.870561  | 1.903448  |
| 21            | 1             | -2.842700               | 1.868160  | 2.923529  |
| 22            | 6             | -0.548099               | 0.797916  | 3.296818  |
| 23            | 1             | -1.263481               | 0.540220  | 4.088369  |
| 24            | 1             | -0.128122               | 1.784211  | 3.533120  |
| 25            | 6             | 0.517078                | -0.298037 | 3.238826  |
| 26            | 1             | 0.023511                | -1.250743 | 3.031412  |
| 27            | 1             | 0.973749                | -0.367984 | 4.239892  |
| 28            | 6             | -3.553125               | -0.818007 | -0.939827 |
| 29            | 6             | -4.694761               | -1.612467 | -1.054991 |
| 30            | 1             | -5.619762               | -1.187027 | -1.431952 |
| 31            | 6             | -4.623309               | -2.955745 | -0.679470 |
| 32            | 1             | -5.495463               | -3.596546 | -0.769860 |
| 33            | 6             | -3.428178               | -3.450556 | -0.165017 |
| 34            | 1             | -3.310671               | -4.472574 | 0.176216  |
| 35            | 6             | -2.337425               | -2.587123 | -0.065210 |
| 36            | 6             | -1.034885               | -3.043225 | 0.576328  |
| 37            | 7             | -2.392069               | -1.304357 | -0.470346 |
| 38            | 6             | 2.347597                | -1.342990 | 1.997156  |
| 39            | 1             | 1.653070                | -2.186634 | 2.034636  |
| 40            | 1             | 3.078066                | -1.454641 | 2.812460  |
| 41            | 6             | 3.046130                | -1.419115 | 0.651098  |
| 42            | 6             | 4.280635                | -2.049130 | 0.481023  |
| 43            | 1             | 4.813750                | -2.449681 | 1.337801  |
| 44            | 6             | 4.809297                | -2.162612 | -0.807983 |
| 45            | 1             | 5.765608                | -2.654306 | -0.961064 |
| 46            | 6             | 4.103571                | -1.639952 | -1.890799 |
| 47            | 1             | 4.464394                | -1.697513 | -2.911270 |
| 48            | 6             | 2.880660                | -1.017718 | -1.642445 |
| 49            | 6             | 2.038388                | -0.416418 | -2.770558 |
| 50            | 7             | 2.378923                | -0.915614 | -0.400221 |
| 51            | 8             | 0.888065                | 0.073001  | -2.367546 |
| 52            | 8             | 2.476493                | -0.421596 | -3.906982 |
| 53            | 8             | -0.952650               | -4.176233 | 1.024810  |
| 54            | 8             | -0.117356               | -2.118777 | 0.609763  |
| 55            | 1             | 0.798903                | 4.506036  | 0.091522  |
| 56            | 1             | 0.952556                | 4.480313  | -1.689300 |

|    |   |           |          |           |
|----|---|-----------|----------|-----------|
| 57 | 1 | 2.284176  | 2.394254 | -1.574340 |
| 58 | 1 | 2.989737  | 3.593998 | -0.455625 |
| 59 | 1 | -3.567321 | 3.365779 | -1.111383 |
| 60 | 1 | -2.466391 | 2.617512 | -2.275763 |
| 61 | 1 | -1.610496 | 4.114723 | 0.248617  |
| 62 | 1 | -1.462365 | 4.591069 | -1.448469 |
| 63 | 1 | 3.506771  | 2.653427 | 1.552049  |
| 64 | 1 | 3.672463  | 1.106580 | 0.691072  |
| 65 | 1 | 3.252337  | 0.753250 | 3.144406  |
| 66 | 1 | 1.838719  | 1.801264 | 3.035980  |

-----  
 HF = -1709.8248594 Hartrees

Zero-point correction = 0.541179 Hartrees

Sum of electronic and thermal Enthalpies = -1709.250454 Hartrees

Sum of electronic and thermal Free Energies = -1709.346033 Hartrees

[Nd(bp15c5)]<sup>+</sup> (vacuum)  $\Lambda(\lambda\delta)(\delta\lambda\lambda)$  (0 imaginary frequencies)

| Center<br>Number | Atomic<br>Number | Coordinates (Angstroms) |           |           |
|------------------|------------------|-------------------------|-----------|-----------|
|                  |                  | X                       | Y         | Z         |
| 1                | 60               | 0.060111                | -0.169995 | -0.027798 |
| 2                | 7                | 2.667321                | -1.476376 | -0.310044 |
| 3                | 7                | -1.694768               | -0.323327 | 2.143676  |
| 4                | 8                | 1.104735                | -1.175160 | 2.150815  |
| 5                | 8                | -1.822181               | -2.218419 | 0.012168  |
| 6                | 8                | 0.296244                | -2.539853 | -1.428901 |
| 7                | 6                | -2.520070               | -1.555564 | 2.181403  |
| 8                | 6                | -2.991993               | -2.012787 | 0.809998  |
| 9                | 6                | -2.086637               | -2.644089 | -1.331972 |
| 10               | 6                | -0.827280               | -3.313624 | -1.854947 |
| 11               | 6                | 1.547602                | -2.957145 | -1.980842 |
| 12               | 1                | 1.771957                | -2.346036 | -2.863566 |
| 13               | 1                | 1.490877                | -4.004500 | -2.301326 |
| 14               | 6                | 2.595787                | -2.839604 | -0.884590 |
| 15               | 1                | 2.318126                | -3.534951 | -0.088081 |
| 16               | 1                | 3.577884                | -3.160400 | -1.268888 |
| 17               | 6                | 3.238750                | -1.509955 | 1.059334  |
| 18               | 1                | 3.533386                | -0.492550 | 1.325182  |
| 19               | 1                | 4.146155                | -2.135594 | 1.094788  |
| 20               | 6                | 3.483979                | -0.609691 | -1.198494 |
| 21               | 1                | 3.098876                | -0.722312 | -2.218676 |
| 22               | 1                | 4.532615                | -0.948107 | -1.217562 |
| 23               | 6                | 2.272170                | -2.011261 | 2.128855  |
| 24               | 1                | 1.966144                | -3.054256 | 1.972176  |
| 25               | 1                | 2.778765                | -1.952914 | 3.100647  |
| 26               | 6                | 0.316610                | -1.282170 | 3.349911  |
| 27               | 1                | 0.955063                | -1.079446 | 4.219447  |
| 28               | 1                | -0.056838               | -2.310293 | 3.443058  |
| 29               | 6                | -0.797907               | -0.238809 | 3.328183  |
| 30               | 1                | -0.337186               | 0.751468  | 3.304870  |
| 31               | 1                | -1.362967               | -0.331414 | 4.270114  |
| 32               | 6                | 3.425470                | 0.852393  | -0.809499 |
| 33               | 6                | 4.493879                | 1.722131  | -1.031747 |
| 34               | 1                | 5.407732                | 1.359878  | -1.492703 |
| 35               | 6                | 4.365741                | 3.058454  | -0.646027 |
| 36               | 1                | 5.179939                | 3.756190  | -0.818433 |
| 37               | 6                | 3.197999                | 3.475164  | -0.010257 |
| 38               | 1                | 3.051190                | 4.487528  | 0.348084  |
| 39               | 6                | 2.182975                | 2.541690  | 0.190694  |

|    |   |           |           |           |
|----|---|-----------|-----------|-----------|
| 40 | 6 | 0.918150  | 2.890126  | 0.965608  |
| 41 | 7 | 2.287380  | 1.267793  | -0.231726 |
| 42 | 6 | -2.549462 | 0.897081  | 2.074310  |
| 43 | 1 | -1.918797 | 1.745379  | 2.355484  |
| 44 | 1 | -3.377655 | 0.829320  | 2.795396  |
| 45 | 6 | -3.077907 | 1.206941  | 0.686099  |
| 46 | 6 | -4.287784 | 1.872169  | 0.476325  |
| 47 | 1 | -4.934394 | 2.110772  | 1.315178  |
| 48 | 6 | -4.640272 | 2.236861  | -0.826075 |
| 49 | 1 | -5.574403 | 2.759891  | -1.009173 |
| 50 | 6 | -3.784149 | 1.930266  | -1.883269 |
| 51 | 1 | -4.000865 | 2.195311  | -2.911724 |
| 52 | 6 | -2.597786 | 1.257360  | -1.596413 |
| 53 | 6 | -1.585202 | 0.893231  | -2.683475 |
| 54 | 7 | -2.271329 | 0.901130  | -0.342113 |
| 55 | 8 | -0.489944 | 0.346458  | -2.214235 |
| 56 | 8 | -1.859077 | 1.111165  | -3.850921 |
| 57 | 8 | 0.779243  | 4.017859  | 1.410984  |
| 58 | 8 | 0.097290  | 1.883907  | 1.097772  |
| 59 | 1 | -0.730080 | -4.330560 | -1.451022 |
| 60 | 1 | -0.870912 | -3.367236 | -2.949945 |
| 61 | 1 | -2.359133 | -1.776051 | -1.942188 |
| 62 | 1 | -2.915082 | -3.363104 | -1.348992 |
| 63 | 1 | -1.919072 | -2.364913 | 2.602606  |
| 64 | 1 | -3.392014 | -1.422404 | 2.840425  |
| 65 | 1 | -3.655336 | -1.285455 | 0.330505  |
| 66 | 1 | -3.537297 | -2.960737 | 0.913481  |

-----  
 HF = -1711.7413125 Hartrees

Zero-point correction = 0.541350 Hartrees

Sum of electronic and thermal Enthalpies = -1711.166800 Hartrees

Sum of electronic and thermal Free Energies = -1711.261777 Hartrees

[Nd(bp15c5)]<sup>+</sup> (vacuum)  $\Lambda(\lambda\delta)(\delta\delta\lambda)$  (0 imaginary frequencies)

| Center<br>Number | Atomic<br>Number | Coordinates (Angstroms) |           |           |
|------------------|------------------|-------------------------|-----------|-----------|
|                  |                  | X                       | Y         | Z         |
| 1                | 60               | 0.058365                | -0.161072 | -0.017340 |
| 2                | 7                | 2.619518                | -1.567996 | -0.302248 |
| 3                | 7                | -1.664661               | -0.143350 | 2.164264  |
| 4                | 8                | 1.091901                | -1.114735 | 2.168251  |
| 5                | 8                | -1.982320               | -2.007510 | 0.054285  |
| 6                | 8                | 0.166303                | -2.736375 | -1.173260 |
| 7                | 6                | -2.522603               | -1.346054 | 2.285090  |
| 8                | 6                | -3.079100               | -1.842556 | 0.958221  |
| 9                | 6                | -2.165939               | -3.047776 | -0.912652 |
| 10               | 6                | -1.037813               | -2.945963 | -1.923328 |
| 11               | 6                | 1.369546                | -3.032850 | -1.882343 |
| 12               | 1                | 1.491315                | -2.340185 | -2.726237 |
| 13               | 1                | 1.326172                | -4.054425 | -2.283480 |
| 14               | 6                | 2.495711                | -2.933834 | -0.867135 |
| 15               | 1                | 2.269610                | -3.630624 | -0.055637 |
| 16               | 1                | 3.443813                | -3.261368 | -1.321328 |
| 17               | 6                | 3.193156                | -1.601129 | 1.066314  |
| 18               | 1                | 3.542445                | -0.595051 | 1.309124  |
| 19               | 1                | 4.066312                | -2.272647 | 1.115093  |
| 20               | 6                | 3.463425                | -0.747625 | -1.208694 |
| 21               | 1                | 3.070627                | -0.868937 | -2.225187 |
| 22               | 1                | 4.498969                | -1.124332 | -1.224566 |

|    |   |           |           |           |
|----|---|-----------|-----------|-----------|
| 23 | 6 | 2.203776  | -2.026080 | 2.148883  |
| 24 | 1 | 1.828686  | -3.047844 | 2.003834  |
| 25 | 1 | 2.719317  | -1.989418 | 3.116786  |
| 26 | 6 | 0.332603  | -1.110819 | 3.391197  |
| 27 | 1 | 1.001848  | -0.877720 | 4.229243  |
| 28 | 1 | -0.077492 | -2.114590 | 3.561328  |
| 29 | 6 | -0.743588 | -0.026924 | 3.328318  |
| 30 | 1 | -0.249827 | 0.943741  | 3.243438  |
| 31 | 1 | -1.294929 | -0.048347 | 4.282611  |
| 32 | 6 | 3.460256  | 0.723280  | -0.853557 |
| 33 | 6 | 4.561122  | 1.545196  | -1.099479 |
| 34 | 1 | 5.459619  | 1.135421  | -1.550743 |
| 35 | 6 | 4.485102  | 2.895483  | -0.751232 |
| 36 | 1 | 5.325221  | 3.556543  | -0.942716 |
| 37 | 6 | 3.334005  | 3.373718  | -0.128827 |
| 38 | 1 | 3.225114  | 4.400685  | 0.200299  |
| 39 | 6 | 2.284488  | 2.485420  | 0.097740  |
| 40 | 6 | 1.034013  | 2.906448  | 0.858168  |
| 41 | 7 | 2.339053  | 1.196317  | -0.286898 |
| 42 | 6 | -2.483236 | 1.098695  | 2.036171  |
| 43 | 1 | -1.824098 | 1.940539  | 2.265595  |
| 44 | 1 | -3.306490 | 1.094908  | 2.765918  |
| 45 | 6 | -3.017015 | 1.342337  | 0.635699  |
| 46 | 6 | -4.224227 | 2.001663  | 0.392568  |
| 47 | 1 | -4.862851 | 2.299298  | 1.218627  |
| 48 | 6 | -4.586059 | 2.280277  | -0.928354 |
| 49 | 1 | -5.517483 | 2.798249  | -1.137686 |
| 50 | 6 | -3.747583 | 1.888069  | -1.971712 |
| 51 | 1 | -3.979602 | 2.075190  | -3.013848 |
| 52 | 6 | -2.563036 | 1.227069  | -1.651028 |
| 53 | 6 | -1.584430 | 0.744539  | -2.722290 |
| 54 | 7 | -2.221919 | 0.968559  | -0.377901 |
| 55 | 8 | -0.486318 | 0.211929  | -2.234786 |
| 56 | 8 | -1.881943 | 0.857008  | -3.898461 |
| 57 | 8 | 0.939345  | 4.050866  | 1.271574  |
| 58 | 8 | 0.172889  | 1.938505  | 1.016198  |
| 59 | 1 | -1.922352 | -2.156009 | 2.705808  |
| 60 | 1 | -3.355732 | -1.163491 | 2.982553  |
| 61 | 1 | -3.815269 | -1.158958 | 0.522131  |
| 62 | 1 | -3.569429 | -2.809422 | 1.129830  |
| 63 | 1 | -0.974887 | -3.880916 | -2.494671 |
| 64 | 1 | -1.181036 | -2.108509 | -2.614219 |
| 65 | 1 | -2.146272 | -4.016682 | -0.396152 |
| 66 | 1 | -3.131468 | -2.936485 | -1.422705 |

-----  
 HF = -1711.7437715 Hartrees

Zero-point correction = 0.541375 Hartrees

Sum of electronic and thermal Enthalpies = -1711.169326 Hartrees

Sum of electronic and thermal Free Energies = -1711.263865 Hartrees

-----  
 [Pr(bp15c5)]<sup>+</sup> (vacuum)  $\Lambda(\lambda\delta)(\delta\lambda\lambda)$  (0 imaginary frequencies)

| Center<br>Number | Atomic<br>Number | Coordinates (Angstroms) |           |           |
|------------------|------------------|-------------------------|-----------|-----------|
|                  |                  | X                       | Y         | Z         |
| 1                | 59               | 0.059535                | -0.163959 | -0.042373 |
| 2                | 7                | 2.677863                | -1.481752 | -0.307205 |
| 3                | 7                | -1.686701               | -0.304058 | 2.153109  |
| 4                | 8                | 1.117647                | -1.158204 | 2.157246  |
| 5                | 8                | -1.814440               | -2.233195 | 0.043489  |



|    |   |           |           |           |
|----|---|-----------|-----------|-----------|
| 6  | 8 | 0.300112  | -2.552337 | -1.421952 |
| 7  | 6 | -2.512835 | -1.535695 | 2.204156  |
| 8  | 6 | -2.983873 | -2.013383 | 0.838939  |
| 9  | 6 | -2.080492 | -2.681797 | -1.293090 |
| 10 | 6 | -0.819412 | -3.351533 | -1.810959 |
| 11 | 6 | 1.553401  | -2.973315 | -1.968236 |
| 12 | 1 | 1.778295  | -2.367789 | -2.854541 |
| 13 | 1 | 1.497461  | -4.022376 | -2.282700 |
| 14 | 6 | 2.602100  | -2.848756 | -0.872518 |
| 15 | 1 | 2.323401  | -3.537589 | -0.070676 |
| 16 | 1 | 3.583207  | -3.174975 | -1.254973 |
| 17 | 6 | 3.248237  | -1.507713 | 1.062948  |
| 18 | 1 | 3.545546  | -0.489290 | 1.321930  |
| 19 | 1 | 4.154142  | -2.135301 | 1.102692  |
| 20 | 6 | 3.497614  | -0.622318 | -1.200052 |
| 21 | 1 | 3.112689  | -0.739430 | -2.219931 |
| 22 | 1 | 4.545033  | -0.964634 | -1.217413 |
| 23 | 6 | 2.281139  | -1.999334 | 2.136680  |
| 24 | 1 | 1.970507  | -3.041897 | 1.985720  |
| 25 | 1 | 2.790489  | -1.938731 | 3.106964  |
| 26 | 6 | 0.330838  | -1.256871 | 3.357493  |
| 27 | 1 | 0.970313  | -1.049968 | 4.225374  |
| 28 | 1 | -0.044502 | -2.283704 | 3.457555  |
| 29 | 6 | -0.782172 | -0.211822 | 3.331478  |
| 30 | 1 | -0.319713 | 0.777536  | 3.297638  |
| 31 | 1 | -1.342192 | -0.294701 | 4.277348  |
| 32 | 6 | 3.445772  | 0.842807  | -0.819332 |
| 33 | 6 | 4.521685  | 1.703460  | -1.040332 |
| 34 | 1 | 5.435827  | 1.331954  | -1.493289 |
| 35 | 6 | 4.400684  | 3.043157  | -0.663779 |
| 36 | 1 | 5.220892  | 3.733964  | -0.835629 |
| 37 | 6 | 3.232284  | 3.472149  | -0.037713 |
| 38 | 1 | 3.090648  | 4.487729  | 0.313510  |
| 39 | 6 | 2.208981  | 2.547443  | 0.163323  |
| 40 | 6 | 0.942978  | 2.913170  | 0.930460  |
| 41 | 7 | 2.306926  | 1.270278  | -0.251109 |
| 42 | 6 | -2.539513 | 0.917735  | 2.082060  |
| 43 | 1 | -1.901689 | 1.767622  | 2.342241  |
| 44 | 1 | -3.355695 | 0.861308  | 2.817745  |
| 45 | 6 | -3.090555 | 1.211885  | 0.699217  |
| 46 | 6 | -4.307594 | 1.867408  | 0.501418  |
| 47 | 1 | -4.943564 | 2.109445  | 1.347385  |
| 48 | 6 | -4.681153 | 2.218152  | -0.799050 |
| 49 | 1 | -5.621118 | 2.733722  | -0.973272 |
| 50 | 6 | -3.838765 | 1.906845  | -1.865726 |
| 51 | 1 | -4.072285 | 2.160724  | -2.893320 |
| 52 | 6 | -2.644035 | 1.243564  | -1.590518 |
| 53 | 6 | -1.647484 | 0.874455  | -2.691345 |
| 54 | 7 | -2.296762 | 0.901881  | -0.337827 |
| 55 | 8 | -0.543075 | 0.334172  | -2.237007 |
| 56 | 8 | -1.941940 | 1.083909  | -3.855406 |
| 57 | 8 | 0.814753  | 4.046092  | 1.365884  |
| 58 | 8 | 0.111394  | 1.916770  | 1.067618  |
| 59 | 1 | -0.705998 | -4.355065 | -1.378717 |
| 60 | 1 | -0.875729 | -3.437597 | -2.903302 |
| 61 | 1 | -2.360556 | -1.825253 | -1.916255 |
| 62 | 1 | -2.904062 | -3.406684 | -1.295887 |
| 63 | 1 | -1.913209 | -2.339514 | 2.637678  |
| 64 | 1 | -3.385965 | -1.393591 | 2.859711  |
| 65 | 1 | -3.646686 | -1.293448 | 0.347879  |
| 66 | 1 | -3.529931 | -2.959142 | 0.957656  |

-----  
HF = -1711.1181101 Hartrees  
Zero-point correction = 0.541194 Hartrees  
Sum of electronic and thermal Enthalpies = -1710.543703 Hartrees  
Sum of electronic and thermal Free Energies = -1710.638893 Hartrees

[Pr(bp15c5)]<sup>+</sup> (vacuum)  $\Lambda(\lambda\delta)(\delta\delta\lambda)$  (0 imaginary frequencies)

| Center<br>Number | Atomic<br>Number | Coordinates (Angstroms) |           |           |
|------------------|------------------|-------------------------|-----------|-----------|
|                  |                  | X                       | Y         | Z         |
| 1                | 59               | 0.059247                | -0.157482 | -0.031470 |
| 2                | 7                | 2.631519                | -1.571465 | -0.301409 |
| 3                | 7                | -1.655928               | -0.129149 | 2.172254  |
| 4                | 8                | 1.106976                | -1.100783 | 2.173491  |
| 5                | 8                | -1.978533               | -2.015247 | 0.076519  |
| 6                | 8                | 0.172148                | -2.751454 | -1.154680 |
| 7                | 6                | -2.515164               | -1.330230 | 2.303121  |
| 8                | 6                | -3.073302               | -1.840843 | 0.981645  |
| 9                | 6                | -2.158576               | -3.070080 | -0.875366 |
| 10               | 6                | -1.036879               | -2.973610 | -1.894191 |
| 11               | 6                | 1.373495                | -3.047819 | -1.867814 |
| 12               | 1                | 1.489354                | -2.359448 | -2.716191 |
| 13               | 1                | 1.331464                | -4.071501 | -2.263553 |
| 14               | 6                | 2.505111                | -2.940359 | -0.858889 |
| 15               | 1                | 2.284442                | -3.633020 | -0.042381 |
| 16               | 1                | 3.450813                | -3.269716 | -1.316721 |
| 17               | 6                | 3.204310                | -1.597795 | 1.067876  |
| 18               | 1                | 3.554698                | -0.590744 | 1.305120  |
| 19               | 1                | 4.076917                | -2.269767 | 1.120306  |
| 20               | 6                | 3.476932                | -0.756284 | -1.211430 |
| 21               | 1                | 3.083625                | -0.881297 | -2.227454 |
| 22               | 1                | 4.511519                | -1.135671 | -1.226532 |
| 23               | 6                | 2.215357                | -2.015994 | 2.153758  |
| 24               | 1                | 1.836527                | -3.036945 | 2.012151  |
| 25               | 1                | 2.733674                | -1.978869 | 3.120235  |
| 26               | 6                | 0.347384                | -1.093543 | 3.395774  |
| 27               | 1                | 1.016210                | -0.859077 | 4.233861  |
| 28               | 1                | -0.064110               | -2.096367 | 3.568428  |
| 29               | 6                | -0.727664               | -0.008402 | 3.330430  |
| 30               | 1                | -0.232323               | 0.960930  | 3.237546  |
| 31               | 1                | -1.274053               | -0.022358 | 4.287733  |
| 32               | 6                | 3.478959                | 0.716750  | -0.862640 |
| 33               | 6                | 4.585725                | 1.531274  | -1.106325 |
| 34               | 1                | 5.484663                | 1.114410  | -1.550158 |
| 35               | 6                | 4.515007                | 2.883851  | -0.765477 |
| 36               | 1                | 5.359855                | 3.539295  | -0.955505 |
| 37               | 6                | 3.363103                | 3.371681  | -0.152294 |
| 38               | 1                | 3.257991                | 4.400939  | 0.170818  |
| 39               | 6                | 2.307050                | 2.490567  | 0.073332  |
| 40               | 6                | 1.055477                | 2.925776  | 0.826149  |
| 41               | 7                | 2.357039                | 1.199244  | -0.304783 |
| 42               | 6                | -2.471824               | 1.114788  | 2.043909  |
| 43               | 1                | -1.805279               | 1.956124  | 2.253862  |
| 44               | 1                | -3.283083               | 1.121962  | 2.787037  |
| 45               | 6                | -3.027669               | 1.346222  | 0.649864  |
| 46               | 6                | -4.241801               | 1.997471  | 0.420228  |
| 47               | 1                | -4.869569               | 2.297980  | 1.253524  |
| 48               | 6                | -4.624787               | 2.264051  | -0.897305 |
| 49               | 1                | -5.561885               | 2.775716  | -1.096619 |

|    |   |           |           |           |
|----|---|-----------|-----------|-----------|
| 50 | 6 | -3.800359 | 1.867487  | -1.950068 |
| 51 | 1 | -4.049357 | 2.044682  | -2.990009 |
| 52 | 6 | -2.607513 | 1.214793  | -1.642589 |
| 53 | 6 | -1.645195 | 0.727537  | -2.727256 |
| 54 | 7 | -2.245600 | 0.968998  | -0.372721 |
| 55 | 8 | -0.537298 | 0.201150  | -2.256160 |
| 56 | 8 | -1.964210 | 0.832273  | -3.898598 |
| 57 | 8 | 0.968840  | 4.074801  | 1.228633  |
| 58 | 8 | 0.186584  | 1.966075  | 0.989960  |
| 59 | 1 | -1.915716 | -2.136405 | 2.732113  |
| 60 | 1 | -3.348343 | -1.140501 | 2.998638  |
| 61 | 1 | -3.810365 | -1.162205 | 0.539739  |
| 62 | 1 | -3.562887 | -2.805960 | 1.164731  |
| 63 | 1 | -0.973789 | -3.913931 | -2.456605 |
| 64 | 1 | -1.188862 | -2.143437 | -2.592219 |
| 65 | 1 | -2.128787 | -4.031836 | -0.346179 |
| 66 | 1 | -3.127247 | -2.973203 | -1.382340 |

-----  
 HF = -1711.1204654 Hartrees

Zero-point correction = 0.541225 Hartrees

Sum of electronic and thermal Enthalpies = -1710.546126 Hartrees

Sum of electronic and thermal Free Energies = -1710.640807 Hartrees

[Lu(bp15c5)]<sup>+</sup> (vacuum)  $\Lambda(\lambda\delta)(\delta\lambda\lambda)$  (0 imaginary frequencies)

| Center<br>Number | Atomic<br>Number | Coordinates (Angstroms) |           |           |
|------------------|------------------|-------------------------|-----------|-----------|
|                  |                  | X                       | Y         | Z         |
| 1                | 71               | 0.060405                | -0.170260 | 0.088028  |
| 2                | 7                | 2.510356                | -1.519278 | -0.300962 |
| 3                | 7                | -1.795312               | -0.344883 | 2.049588  |
| 4                | 8                | 0.928064                | -1.267446 | 2.100315  |
| 5                | 8                | -1.967006               | -2.021311 | -0.186161 |
| 6                | 8                | 0.159391                | -2.539181 | -1.416203 |
| 7                | 6                | -2.665635               | -1.543329 | 2.010079  |
| 8                | 6                | -3.141269               | -1.867383 | 0.606169  |
| 9                | 6                | -2.210237               | -2.353714 | -1.556295 |
| 10               | 6                | -0.983503               | -3.100924 | -2.056821 |
| 11               | 6                | 1.391298                | -2.955596 | -1.995176 |
| 12               | 1                | 1.620237                | -2.327382 | -2.865469 |
| 13               | 1                | 1.321002                | -3.997382 | -2.335709 |
| 14               | 6                | 2.437376                | -2.872040 | -0.899926 |
| 15               | 1                | 2.154044                | -3.582377 | -0.119214 |
| 16               | 1                | 3.420559                | -3.185483 | -1.285894 |
| 17               | 6                | 3.089059                | -1.590410 | 1.062419  |
| 18               | 1                | 3.401189                | -0.585923 | 1.354347  |
| 19               | 1                | 3.983832                | -2.234048 | 1.085004  |
| 20               | 6                | 3.327838                | -0.648771 | -1.183808 |
| 21               | 1                | 2.920197                | -0.728250 | -2.197297 |
| 22               | 1                | 4.370853                | -1.001820 | -1.224156 |
| 23               | 6                | 2.101827                | -2.100906 | 2.105301  |
| 24               | 1                | 1.799919                | -3.142100 | 1.934975  |
| 25               | 1                | 2.577400                | -2.043756 | 3.091952  |
| 26               | 6                | 0.120478                | -1.394402 | 3.290031  |
| 27               | 1                | 0.756296                | -1.234071 | 4.169345  |
| 28               | 1                | -0.271000               | -2.418285 | 3.340447  |
| 29               | 6                | -0.974383               | -0.332279 | 3.287242  |
| 30               | 1                | -0.503004               | 0.649406  | 3.346912  |
| 31               | 1                | -1.591064               | -0.479185 | 4.188787  |
| 32               | 6                | 3.286986                | 0.798157  | -0.756228 |

|    |   |           |           |           |
|----|---|-----------|-----------|-----------|
| 33 | 6 | 4.328756  | 1.691289  | -1.012659 |
| 34 | 1 | 5.217017  | 1.357790  | -1.540419 |
| 35 | 6 | 4.207262  | 3.011464  | -0.574830 |
| 36 | 1 | 5.000764  | 3.726405  | -0.771283 |
| 37 | 6 | 3.072593  | 3.390734  | 0.141367  |
| 38 | 1 | 2.933590  | 4.389477  | 0.539148  |
| 39 | 6 | 2.086780  | 2.434341  | 0.366050  |
| 40 | 6 | 0.850957  | 2.708656  | 1.198928  |
| 41 | 7 | 2.183101  | 1.175907  | -0.098581 |
| 42 | 6 | -2.608511 | 0.900395  | 1.945625  |
| 43 | 1 | -2.013852 | 1.715375  | 2.365051  |
| 44 | 1 | -3.532770 | 0.811370  | 2.535233  |
| 45 | 6 | -2.928772 | 1.295871  | 0.516232  |
| 46 | 6 | -4.059022 | 2.043513  | 0.176232  |
| 47 | 1 | -4.791592 | 2.302273  | 0.934650  |
| 48 | 6 | -4.222166 | 2.461046  | -1.147040 |
| 49 | 1 | -5.092324 | 3.047402  | -1.427473 |
| 50 | 6 | -3.261027 | 2.124028  | -2.100477 |
| 51 | 1 | -3.332066 | 2.424634  | -3.139523 |
| 52 | 6 | -2.163779 | 1.373045  | -1.687260 |
| 53 | 6 | -1.039149 | 0.958577  | -2.631400 |
| 54 | 7 | -2.018629 | 0.967773  | -0.413230 |
| 55 | 8 | -0.054842 | 0.345357  | -2.016864 |
| 56 | 8 | -1.129160 | 1.194475  | -3.823053 |
| 57 | 8 | 0.672893  | 3.804144  | 1.704448  |
| 58 | 8 | 0.078009  | 1.659100  | 1.306703  |
| 59 | 1 | -1.041543 | -4.168081 | -1.801129 |
| 60 | 1 | -0.909237 | -3.002722 | -3.147323 |
| 61 | 1 | -2.388039 | -1.437091 | -2.128999 |
| 62 | 1 | -3.095711 | -2.995217 | -1.643219 |
| 63 | 1 | -2.093515 | -2.402700 | 2.368212  |
| 64 | 1 | -3.531474 | -1.423302 | 2.679667  |
| 65 | 1 | -3.787251 | -1.084645 | 0.191651  |
| 66 | 1 | -3.709143 | -2.807766 | 0.618037  |

-----  
 HF = -1718.2176357 Hartrees

Zero-point correction = 0.542314 Hartrees

Sum of electronic and thermal Enthalpies = -1717.642345 Hartrees

Sum of electronic and thermal Free Energies = -1717.737071 Hartrees

[Lu(bp15c5)]<sup>+</sup> (vacuum)  $\Lambda(\lambda\delta)(\delta\delta\lambda)$  (0 imaginary frequencies)

| Center<br>Number | Atomic<br>Number | Coordinates (Angstroms) |           |           |
|------------------|------------------|-------------------------|-----------|-----------|
|                  |                  | X                       | Y         | Z         |
| 1                | 71               | 0.057304                | -0.143675 | 0.104795  |
| 2                | 7                | 2.455426                | -1.618831 | -0.263830 |
| 3                | 7                | -1.768172               | -0.140306 | 2.074570  |
| 4                | 8                | 0.900721                | -1.180733 | 2.141843  |
| 5                | 8                | -2.101821               | -1.866871 | -0.111843 |
| 6                | 8                | 0.025699                | -2.717413 | -1.234477 |
| 7                | 6                | -2.666198               | -1.316573 | 2.129305  |
| 8                | 6                | -3.212956               | -1.712609 | 0.769294  |
| 9                | 6                | -2.323386               | -2.831858 | -1.143629 |
| 10               | 6                | -1.126947               | -2.791821 | -2.072549 |
| 11               | 6                | 1.240662                | -3.028700 | -1.904895 |
| 12               | 1                | 1.411835                | -2.319423 | -2.725206 |
| 13               | 1                | 1.189477                | -4.040920 | -2.330703 |
| 14               | 6                | 2.322668                | -2.977177 | -0.844691 |
| 15               | 1                | 2.041053                | -3.674904 | -0.051631 |

|    |   |           |           |           |
|----|---|-----------|-----------|-----------|
| 16 | 1 | 3.283446  | -3.322430 | -1.256881 |
| 17 | 6 | 3.026169  | -1.686165 | 1.102706  |
| 18 | 1 | 3.398471  | -0.694236 | 1.367397  |
| 19 | 1 | 3.880276  | -2.381685 | 1.147624  |
| 20 | 6 | 3.320113  | -0.811447 | -1.160229 |
| 21 | 1 | 2.926000  | -0.909838 | -2.177259 |
| 22 | 1 | 4.347740  | -1.209099 | -1.172870 |
| 23 | 6 | 2.007567  | -2.103969 | 2.156021  |
| 24 | 1 | 1.623807  | -3.119828 | 1.999487  |
| 25 | 1 | 2.488992  | -2.069474 | 3.140595  |
| 26 | 6 | 0.127077  | -1.174905 | 3.360819  |
| 27 | 1 | 0.796299  | -0.968196 | 4.204840  |
| 28 | 1 | -0.301713 | -2.173787 | 3.508423  |
| 29 | 6 | -0.926909 | -0.072603 | 3.297919  |
| 30 | 1 | -0.419906 | 0.892762  | 3.282230  |
| 31 | 1 | -1.534714 | -0.133218 | 4.215214  |
| 32 | 6 | 3.336458  | 0.650232  | -0.788148 |
| 33 | 6 | 4.420378  | 1.483051  | -1.073409 |
| 34 | 1 | 5.297343  | 1.084572  | -1.574361 |
| 35 | 6 | 4.355154  | 2.826537  | -0.700960 |
| 36 | 1 | 5.182168  | 3.495053  | -0.921094 |
| 37 | 6 | 3.230309  | 3.289466  | -0.019511 |
| 38 | 1 | 3.130646  | 4.311686  | 0.327069  |
| 39 | 6 | 2.200775  | 2.389525  | 0.238843  |
| 40 | 6 | 0.971429  | 2.763956  | 1.040175  |
| 41 | 7 | 2.243657  | 1.105579  | -0.161380 |
| 42 | 6 | -2.551777 | 1.118230  | 1.903113  |
| 43 | 1 | -1.931828 | 1.941381  | 2.265723  |
| 44 | 1 | -3.470319 | 1.088383  | 2.507071  |
| 45 | 6 | -2.879818 | 1.426241  | 0.453766  |
| 46 | 6 | -4.003757 | 2.161830  | 0.068533  |
| 47 | 1 | -4.725419 | 2.487987  | 0.811259  |
| 48 | 6 | -4.175692 | 2.476311  | -1.281908 |
| 49 | 1 | -5.040263 | 3.052146  | -1.598887 |
| 50 | 6 | -3.234434 | 2.044495  | -2.217496 |
| 51 | 1 | -3.320206 | 2.255498  | -3.277290 |
| 52 | 6 | -2.142257 | 1.314151  | -1.757275 |
| 53 | 6 | -1.052401 | 0.778419  | -2.677854 |
| 54 | 7 | -1.983800 | 1.019736  | -0.456143 |
| 55 | 8 | -0.059989 | 0.209975  | -2.028387 |
| 56 | 8 | -1.170100 | 0.877545  | -3.886134 |
| 57 | 8 | 0.838577  | 3.890778  | 1.486693  |
| 58 | 8 | 0.149485  | 1.757829  | 1.192330  |
| 59 | 1 | -2.098121 | -2.168102 | 2.511354  |
| 60 | 1 | -3.500286 | -1.139849 | 2.827002  |
| 61 | 1 | -3.914115 | -0.975668 | 0.359889  |
| 62 | 1 | -3.746769 | -2.666349 | 0.872682  |
| 63 | 1 | -1.105688 | -3.708425 | -2.677617 |
| 64 | 1 | -1.151373 | -1.926973 | -2.743549 |
| 65 | 1 | -2.426941 | -3.823193 | -0.681847 |
| 66 | 1 | -3.242247 | -2.602746 | -1.699447 |

-----  
HF = -1718.2207713 Hartrees

Zero-point correction = 0.542597 Hartrees

Sum of electronic and thermal Enthalpies = -1717.645365 Hartrees

Sum of electronic and thermal Free Energies = -1717.739373 Hartrees

[Lu(bp15c5)]<sup>+</sup> (vacuum)  $\Lambda(\lambda\delta)(\lambda\delta\lambda)$  (0 imaginary frequencies)

| Center Number | Atomic Number | Coordinates (Angstroms) |           |           |
|---------------|---------------|-------------------------|-----------|-----------|
|               |               | X                       | Y         | Z         |
| 1             | 71            | -0.038306               | -0.107326 | -0.060939 |
| 2             | 7             | -2.456816               | -1.626763 | 0.291197  |
| 3             | 7             | 1.886660                | -0.082205 | -2.006357 |
| 4             | 8             | -0.737380               | -1.306918 | -2.052438 |
| 5             | 8             | 2.122929                | -1.967156 | 0.076915  |
| 6             | 8             | -0.051249               | -2.588964 | 1.343221  |
| 7             | 6             | 2.970748                | -1.100778 | -1.967165 |
| 8             | 1             | 3.295643                | -1.364729 | -2.984865 |
| 9             | 1             | 3.828629                | -0.648076 | -1.464254 |
| 10            | 6             | 2.631063                | -2.360900 | -1.194030 |
| 11            | 1             | 1.895751                | -3.001864 | -1.700497 |
| 12            | 1             | 3.551346                | -2.948151 | -1.072476 |
| 13            | 6             | 2.219127                | -3.009096 | 1.055406  |
| 14            | 1             | 3.223097                | -3.018162 | 1.499034  |
| 15            | 1             | 2.033320                | -3.978174 | 0.574176  |
| 16            | 6             | 1.150265                | -2.757829 | 2.094355  |
| 17            | 1             | 1.073628                | -3.627524 | 2.759798  |
| 18            | 1             | 1.345162                | -1.867767 | 2.701688  |
| 19            | 6             | -1.254313               | -2.893991 | 2.037903  |
| 20            | 1             | -1.449350               | -2.138879 | 2.809767  |
| 21            | 1             | -1.173535               | -3.875683 | 2.524897  |
| 22            | 6             | -2.324860               | -2.940880 | 0.965176  |
| 23            | 1             | -2.022138               | -3.690475 | 0.229713  |
| 24            | 1             | -3.288169               | -3.267090 | 1.385831  |
| 25            | 6             | -2.924701               | -1.781937 | -1.105291 |
| 26            | 1             | -3.287970               | -0.812442 | -1.454244 |
| 27            | 1             | -3.765907               | -2.491794 | -1.173781 |
| 28            | 6             | -3.392211               | -0.800213 | 1.090427  |
| 29            | 1             | -3.065077               | -0.852686 | 2.134773  |
| 30            | 1             | -4.412083               | -1.216498 | 1.053505  |
| 31            | 6             | -1.830308               | -2.249850 | -2.060251 |
| 32            | 1             | -1.441681               | -3.243189 | -1.804999 |
| 33            | 1             | -2.250085               | -2.297373 | -3.071912 |
| 34            | 6             | 0.096304                | -1.350951 | -3.234278 |
| 35            | 1             | -0.546451               | -1.277765 | -4.119799 |
| 36            | 1             | 0.613002                | -2.317533 | -3.269016 |
| 37            | 6             | 1.058257                | -0.166228 | -3.231179 |
| 38            | 1             | 0.471994                | 0.752428  | -3.287263 |
| 39            | 1             | 1.678778                | -0.236941 | -4.139732 |
| 40            | 6             | -3.410790               | 0.645305  | 0.665131  |
| 41            | 6             | -4.525602               | 1.463378  | 0.863038  |
| 42            | 1             | -5.420080               | 1.061119  | 1.328798  |
| 43            | 6             | -4.468535               | 2.794632  | 0.449899  |
| 44            | 1             | -5.319296               | 3.451959  | 0.602864  |
| 45            | 6             | -3.318507               | 3.257279  | -0.188290 |
| 46            | 1             | -3.220846               | 4.268066  | -0.567455 |
| 47            | 6             | -2.260367               | 2.370732  | -0.361410 |
| 48            | 6             | -1.008373               | 2.739816  | -1.125344 |
| 49            | 7             | -2.293455               | 1.100638  | 0.083818  |
| 50            | 6             | 2.518258                | 1.264418  | -1.870296 |
| 51            | 1             | 1.792173                | 2.012935  | -2.191831 |
| 52            | 1             | 3.411269                | 1.346422  | -2.505588 |
| 53            | 6             | 2.860886                | 1.556238  | -0.422374 |
| 54            | 6             | 3.970212                | 2.308597  | -0.032559 |
| 55            | 1             | 4.674926                | 2.666925  | -0.776563 |
| 56            | 6             | 4.150108                | 2.600393  | 1.322646  |

|    |   |           |          |           |
|----|---|-----------|----------|-----------|
| 57 | 1 | 5.006256  | 3.186995 | 1.642704  |
| 58 | 6 | 3.224807  | 2.135522 | 2.256724  |
| 59 | 1 | 3.312046  | 2.333139 | 3.318952  |
| 60 | 6 | 2.144176  | 1.389439 | 1.792457  |
| 61 | 6 | 1.060863  | 0.841418 | 2.713114  |
| 62 | 7 | 1.983936  | 1.105521 | 0.489807  |
| 63 | 8 | 0.066141  | 0.276710 | 2.062040  |
| 64 | 8 | 1.179998  | 0.933345 | 3.921452  |
| 65 | 8 | -0.869134 | 3.853035 | -1.602250 |
| 66 | 8 | -0.172050 | 1.738138 | -1.217395 |

-----  
 HF = -1718.214945 Hartrees

Zero-point correction = 0.542326 Hartrees

Sum of electronic and thermal Enthalpies = -1717.639669 Hartrees

Sum of electronic and thermal Free Energies = -1717.734480 Hartrees

[Lu(bp15c5)]<sup>+</sup> (vacuum)  $\Lambda(\delta\delta)(\lambda\delta\lambda)$  (0 imaginary frequencies)

| Center<br>Number | Atomic<br>Number | Coordinates (Angstroms) |           |           |
|------------------|------------------|-------------------------|-----------|-----------|
|                  |                  | X                       | Y         | Z         |
| 1                | 71               | -0.032563               | -0.248701 | -0.020975 |
| 2                | 7                | -2.761316               | -1.224737 | 0.064338  |
| 3                | 7                | 2.061968                | -0.773974 | -1.738736 |
| 4                | 8                | -0.731406               | -1.423723 | -2.026270 |
| 5                | 8                | 1.719482                | -2.260416 | 0.642982  |
| 6                | 8                | -0.724256               | -2.414394 | 1.508125  |
| 7                | 6                | 3.092934                | -1.706354 | -1.212130 |
| 8                | 1                | 3.712773                | -2.109343 | -2.027526 |
| 9                | 1                | 3.753083                | -1.139616 | -0.552400 |
| 10               | 6                | 2.504923                | -2.838501 | -0.401372 |
| 11               | 1                | 1.876650                | -3.516000 | -0.998431 |
| 12               | 1                | 3.323984                | -3.430252 | 0.027940  |
| 13               | 6                | 1.473041                | -3.186938 | 1.707758  |
| 14               | 1                | 2.365245                | -3.278006 | 2.340859  |
| 15               | 1                | 1.235201                | -4.170784 | 1.281677  |
| 16               | 6                | 0.287538                | -2.673431 | 2.490554  |
| 17               | 1                | -0.047394               | -3.442014 | 3.197213  |
| 18               | 1                | 0.505659                | -1.749621 | 3.034469  |
| 19               | 6                | -2.058822               | -2.664070 | 1.936804  |
| 20               | 1                | -2.342551               | -1.953982 | 2.723956  |
| 21               | 1                | -2.138308               | -3.678521 | 2.350245  |
| 22               | 6                | -2.923947               | -2.550882 | 0.694900  |
| 23               | 1                | -2.598313               | -3.320486 | -0.009200 |
| 24               | 1                | -3.977968               | -2.756688 | 0.940752  |
| 25               | 6                | -3.101219               | -1.251993 | -1.376124 |
| 26               | 1                | -3.187550               | -0.218819 | -1.719205 |
| 27               | 1                | -4.075287               | -1.740240 | -1.553327 |
| 28               | 6                | -3.596900               | -0.245472 | 0.799586  |
| 29               | 1                | -3.434192               | -0.401012 | 1.870928  |
| 30               | 1                | -4.668589               | -0.426372 | 0.614012  |
| 31               | 6                | -2.056387               | -1.964064 | -2.236289 |
| 32               | 1                | -2.007039               | -3.036936 | -2.022733 |
| 33               | 1                | -2.337258               | -1.844401 | -3.286980 |
| 34               | 6                | 0.008337                | -0.988361 | -3.202734 |
| 35               | 6                | 1.484357                | -1.313165 | -2.997433 |
| 36               | 6                | -3.250310               | 1.182783  | 0.455801  |
| 37               | 6                | -4.144888               | 2.241401  | 0.635315  |
| 38               | 1                | -5.129416               | 2.060231  | 1.056067  |
| 39               | 6                | -3.752564               | 3.525249  | 0.254986  |

|    |   |           |           |           |
|----|---|-----------|-----------|-----------|
| 40 | 1 | -4.424401 | 4.366303  | 0.398444  |
| 41 | 6 | -2.509336 | 3.705949  | -0.353225 |
| 42 | 1 | -2.169683 | 4.666575  | -0.723408 |
| 43 | 6 | -1.692689 | 2.592148  | -0.515609 |
| 44 | 6 | -0.399308 | 2.617478  | -1.302082 |
| 45 | 7 | -2.036663 | 1.370043  | -0.070993 |
| 46 | 6 | 2.712327  | 0.554955  | -1.912845 |
| 47 | 1 | 2.036759  | 1.201739  | -2.474532 |
| 48 | 1 | 3.655537  | 0.454076  | -2.470902 |
| 49 | 6 | 2.963283  | 1.194395  | -0.558596 |
| 50 | 6 | 4.042157  | 2.040034  | -0.298307 |
| 51 | 1 | 4.770888  | 2.250186  | -1.075031 |
| 52 | 6 | 4.163210  | 2.614657  | 0.970289  |
| 53 | 1 | 4.994766  | 3.278575  | 1.187546  |
| 54 | 6 | 3.214603  | 2.328211  | 1.951255  |
| 55 | 1 | 3.259714  | 2.742702  | 2.951790  |
| 56 | 6 | 2.164774  | 1.475757  | 1.617095  |
| 57 | 6 | 1.052222  | 1.111590  | 2.592193  |
| 58 | 7 | 2.057757  | 0.925035  | 0.396862  |
| 59 | 8 | 0.083886  | 0.413748  | 2.034286  |
| 60 | 8 | 1.121004  | 1.455930  | 3.757388  |
| 61 | 8 | 0.050980  | 3.661487  | -1.743702 |
| 62 | 8 | 0.096919  | 1.416351  | -1.462115 |
| 63 | 1 | 1.583178  | -2.402324 | -2.968509 |
| 64 | 1 | 2.046739  | -0.962765 | -3.875943 |
| 65 | 1 | -0.353376 | -1.540188 | -4.076179 |
| 66 | 1 | -0.165975 | 0.081042  | -3.336962 |

-----  
 HF = -1718.2094663 Hartrees

Zero-point correction = 0.542236 Hartrees

Sum of electronic and thermal Enthalpies = -1717.634313 Hartrees

Sum of electronic and thermal Free Energies = -1717.729084 Hartrees

[Lu(bp15c5)]<sup>+</sup> (vacuum)  $\Lambda(\lambda\delta)(\delta\delta\delta)$  (0 imaginary frequencies)

| Center<br>Number | Atomic<br>Number | Coordinates (Angstroms) |           |           |
|------------------|------------------|-------------------------|-----------|-----------|
|                  |                  | X                       | Y         | Z         |
| 1                | 71               | 0.176246                | -0.083350 | 0.050560  |
| 2                | 7                | 2.003072                | -1.808882 | -0.876853 |
| 3                | 7                | -1.711644               | -0.413335 | 1.887369  |
| 4                | 8                | 0.806690                | -1.787247 | 1.674437  |
| 5                | 8                | -3.415857               | -0.956446 | -0.632489 |
| 6                | 8                | -0.858882               | -2.174590 | -1.071169 |
| 7                | 6                | -2.759591               | -1.461492 | 1.703317  |
| 8                | 6                | -3.869690               | -1.170384 | 0.689551  |
| 9                | 6                | -3.248414               | -2.094444 | -1.463414 |
| 10               | 6                | -1.874355               | -2.026978 | -2.099013 |
| 11               | 6                | 0.019683                | -3.300927 | -1.210836 |
| 12               | 6                | 1.380010                | -2.848773 | -1.729774 |
| 13               | 6                | 2.712885                | -2.373033 | 0.302332  |
| 14               | 1                | 3.391773                | -1.602380 | 0.670534  |
| 15               | 1                | 3.329737                | -3.238741 | 0.013672  |
| 16               | 6                | 2.946749                | -0.987208 | -1.691703 |
| 17               | 1                | 2.403354                | -0.667624 | -2.587360 |
| 18               | 1                | 3.817387                | -1.577960 | -2.013503 |
| 19               | 6                | 1.810183                | -2.792017 | 1.465616  |
| 20               | 1                | 1.323496                | -3.760683 | 1.301407  |
| 21               | 1                | 2.425231                | -2.882283 | 2.369894  |
| 22               | 6                | 0.001873                | -1.989201 | 2.856003  |



|    |   |           |           |           |
|----|---|-----------|-----------|-----------|
| 23 | 6 | -0.878242 | -0.763794 | 3.072324  |
| 24 | 6 | 3.388297  | 0.246649  | -0.935676 |
| 25 | 6 | 4.627412  | 0.863271  | -1.105390 |
| 26 | 1 | 5.352908  | 0.456216  | -1.802845 |
| 27 | 6 | 4.913344  | 2.011573  | -0.360139 |
| 28 | 1 | 5.869176  | 2.512629  | -0.481604 |
| 29 | 6 | 3.974996  | 2.493663  | 0.552210  |
| 30 | 1 | 4.152234  | 3.363700  | 1.174062  |
| 31 | 6 | 2.764155  | 1.815611  | 0.669119  |
| 32 | 6 | 1.676445  | 2.210151  | 1.656418  |
| 33 | 7 | 2.483243  | 0.732283  | -0.073451 |
| 34 | 6 | -2.306821 | 0.944356  | 2.080215  |
| 35 | 1 | -1.581901 | 1.537067  | 2.644626  |
| 36 | 1 | -3.229804 | 0.891116  | 2.674563  |
| 37 | 6 | -2.546764 | 1.671848  | 0.769676  |
| 38 | 6 | -3.548113 | 2.627973  | 0.592589  |
| 39 | 1 | -4.241623 | 2.852629  | 1.397337  |
| 40 | 6 | -3.637618 | 3.291724  | -0.634003 |
| 41 | 1 | -4.408041 | 4.041377  | -0.789004 |
| 42 | 6 | -2.741139 | 2.981244  | -1.657075 |
| 43 | 1 | -2.772270 | 3.457905  | -2.630063 |
| 44 | 6 | -1.772611 | 2.013978  | -1.405676 |
| 45 | 6 | -0.752876 | 1.565530  | -2.446553 |
| 46 | 7 | -1.686793 | 1.392867  | -0.218309 |
| 47 | 8 | 0.082087  | 0.652256  | -1.991958 |
| 48 | 8 | -0.780889 | 2.030622  | -3.570572 |
| 49 | 8 | 1.854835  | 3.137089  | 2.426082  |
| 50 | 8 | 0.614387  | 1.446581  | 1.567807  |
| 51 | 1 | 2.041923  | -3.722268 | -1.845313 |
| 52 | 1 | 1.230642  | -2.415434 | -2.722670 |
| 53 | 1 | -0.408553 | -4.031019 | -1.905769 |
| 54 | 1 | 0.082621  | -3.785320 | -0.235314 |
| 55 | 1 | -1.757017 | -2.818456 | -2.846419 |
| 56 | 1 | -1.716193 | -1.062484 | -2.585084 |
| 57 | 1 | -3.355122 | -3.027728 | -0.893837 |
| 58 | 1 | -4.013143 | -2.087141 | -2.253288 |
| 59 | 1 | -4.576956 | -2.011248 | 0.733449  |
| 60 | 1 | -4.428717 | -0.273181 | 0.967892  |
| 61 | 1 | -2.257247 | -2.389704 | 1.415243  |
| 62 | 1 | -3.256935 | -1.645159 | 2.671338  |
| 63 | 1 | -0.231676 | 0.091347  | 3.277368  |
| 64 | 1 | -1.503541 | -0.948288 | 3.960716  |
| 65 | 1 | 0.663000  | -2.104301 | 3.723484  |
| 66 | 1 | -0.571148 | -2.917312 | 2.737611  |

-----  
 HF = -1718.2123353 Hartrees

Zero-point correction = 0.542220 Hartrees

Sum of electronic and thermal Enthalpies = -1717.637337 Hartrees

Sum of electronic and thermal Free Energies = -1717.731320 Hartrees

[Lu(bp15c5)]<sup>+</sup> (vacuum)  $\Lambda(\lambda\lambda)(\delta\delta\lambda)$

(0 imaginary frequencies)

| Center<br>Number | Atomic<br>Number | Coordinates (Angstroms) |           |          |
|------------------|------------------|-------------------------|-----------|----------|
|                  |                  | X                       | Y         | Z        |
| 1                | 71               | -0.019146               | 0.112790  | 0.055463 |
| 2                | 7                | -2.298909               | 1.940871  | 0.038415 |
| 3                | 7                | 1.459681                | -0.659192 | 2.142304 |
| 4                | 8                | -1.187076               | 0.317955  | 2.196281 |
| 5                | 8                | 2.100489                | 1.713882  | 0.828011 |

|    |   |           |           |           |
|----|---|-----------|-----------|-----------|
| 6  | 8 | 0.301878  | 2.810300  | -0.554993 |
| 7  | 6 | 2.189212  | 0.436397  | 2.819431  |
| 8  | 6 | 2.992037  | 1.287582  | 1.852770  |
| 9  | 6 | 2.548290  | 2.874034  | 0.122936  |
| 10 | 6 | 1.610119  | 3.075768  | -1.053968 |
| 11 | 6 | -0.772217 | 3.329254  | -1.338406 |
| 12 | 1 | -0.912025 | 2.714878  | -2.236307 |
| 13 | 1 | -0.550697 | 4.359687  | -1.647093 |
| 14 | 6 | -1.968110 | 3.325268  | -0.406295 |
| 15 | 1 | -1.700260 | 3.922202  | 0.468375  |
| 16 | 1 | -2.834109 | 3.809352  | -0.880707 |
| 17 | 6 | -2.813760 | 1.950203  | 1.429940  |
| 18 | 6 | -3.265040 | 1.387238  | -0.938411 |
| 19 | 1 | -2.905844 | 1.661129  | -1.937515 |
| 20 | 1 | -4.252251 | 1.861380  | -0.815828 |
| 21 | 6 | -2.588035 | 0.671265  | 2.228814  |
| 22 | 6 | -0.705837 | -0.336098 | 3.393890  |
| 23 | 1 | -1.507580 | -0.947003 | 3.823122  |
| 24 | 1 | -0.447458 | 0.441758  | 4.121922  |
| 25 | 6 | 0.463063  | -1.263610 | 3.064216  |
| 26 | 1 | 0.074873  | -2.150716 | 2.564963  |
| 27 | 1 | 0.926621  | -1.573322 | 4.015018  |
| 28 | 6 | -3.406883 | -0.112897 | -0.908350 |
| 29 | 6 | -4.598166 | -0.737214 | -1.285794 |
| 30 | 1 | -5.461797 | -0.138422 | -1.558585 |
| 31 | 6 | -4.655324 | -2.130818 | -1.310237 |
| 32 | 1 | -5.568490 | -2.637032 | -1.608977 |
| 33 | 6 | -3.530603 | -2.858352 | -0.927446 |
| 34 | 1 | -3.509264 | -3.941642 | -0.898572 |
| 35 | 6 | -2.387575 | -2.159646 | -0.548529 |
| 36 | 6 | -1.153094 | -2.875711 | -0.039862 |
| 37 | 7 | -2.318949 | -0.813670 | -0.555086 |
| 38 | 6 | 2.400601  | -1.709585 | 1.652579  |
| 39 | 1 | 1.846065  | -2.651138 | 1.618065  |
| 40 | 1 | 3.235214  | -1.839742 | 2.356525  |
| 41 | 6 | 2.920404  | -1.478946 | 0.245221  |
| 42 | 6 | 4.123615  | -2.026126 | -0.208877 |
| 43 | 1 | 4.778777  | -2.554043 | 0.477469  |
| 44 | 6 | 4.455539  | -1.901178 | -1.560139 |
| 45 | 1 | 5.383772  | -2.324890 | -1.932177 |
| 46 | 6 | 3.583383  | -1.241702 | -2.427205 |
| 47 | 1 | 3.781631  | -1.129188 | -3.486963 |
| 48 | 6 | 2.407905  | -0.715910 | -1.898154 |
| 49 | 6 | 1.367310  | 0.006502  | -2.746978 |
| 50 | 7 | 2.107790  | -0.822493 | -0.592881 |
| 51 | 8 | 0.283327  | 0.326857  | -2.076041 |
| 52 | 8 | 1.600045  | 0.249801  | -3.917738 |
| 53 | 8 | -1.147542 | -4.090970 | 0.068425  |
| 54 | 8 | -0.187887 | -2.056931 | 0.278992  |
| 55 | 1 | 1.457481  | 1.087318  | 3.305666  |
| 56 | 1 | 2.854647  | 0.040391  | 3.603324  |
| 57 | 1 | 3.836619  | 0.742607  | 1.411151  |
| 58 | 1 | 3.393146  | 2.156284  | 2.392165  |
| 59 | 1 | -2.881664 | 0.872803  | 3.265269  |
| 60 | 1 | -3.170055 | -0.179020 | 1.863073  |
| 61 | 1 | -3.890252 | 2.186868  | 1.461657  |
| 62 | 1 | -2.292626 | 2.749957  | 1.962433  |
| 63 | 1 | 1.685169  | 4.111048  | -1.411525 |
| 64 | 1 | 1.840100  | 2.405162  | -1.888091 |
| 65 | 1 | 2.515852  | 3.734940  | 0.804250  |
| 66 | 1 | 3.579567  | 2.740195  | -0.229670 |

-----  
HF = -1718.2125413 Hartrees  
Zero-point correction = 0.542611 Hartrees  
Sum of electronic and thermal Enthalpies = -1717.637071 Hartrees  
Sum of electronic and thermal Free Energies = -1717.731350 Hartrees

[Lu(bp15c5)]<sup>+</sup> (vacuum)  $\Lambda(\delta\lambda)(\lambda\delta\lambda)$  (0 imaginary frequencies)

| Center<br>Number | Atomic<br>Number | Coordinates (Angstroms) |           |           |
|------------------|------------------|-------------------------|-----------|-----------|
|                  |                  | X                       | Y         | Z         |
| 1                | 71               | -0.016277               | -0.236094 | 0.016830  |
| 2                | 7                | 2.743640                | -1.496986 | -0.050691 |
| 3                | 7                | -1.933376               | -0.508194 | 1.957421  |
| 4                | 8                | 0.942883                | -0.916565 | 2.207689  |
| 5                | 8                | -1.765504               | -2.279787 | -0.213602 |
| 6                | 8                | 0.514946                | -2.480353 | -1.399016 |
| 7                | 6                | -2.975855               | -1.532491 | 1.682348  |
| 8                | 1                | -3.484131               | -1.836275 | 2.609883  |
| 9                | 1                | -3.728387               | -1.082255 | 1.031722  |
| 10               | 6                | -2.423909               | -2.745272 | 0.968128  |
| 11               | 1                | -1.713764               | -3.321740 | 1.578765  |
| 12               | 1                | -3.254315               | -3.410045 | 0.698518  |
| 13               | 6                | -1.664390               | -3.294037 | -1.222552 |
| 14               | 6                | -0.608649               | -2.844535 | -2.207939 |
| 15               | 6                | 1.800190                | -2.780798 | -1.936964 |
| 16               | 1                | 2.072131                | -2.040758 | -2.700020 |
| 17               | 1                | 1.787453                | -3.770833 | -2.410913 |
| 18               | 6                | 2.744721                | -2.803775 | -0.749815 |
| 19               | 1                | 2.382662                | -3.569496 | -0.059306 |
| 20               | 1                | 3.756691                | -3.098306 | -1.070762 |
| 21               | 6                | 3.105817                | -1.645408 | 1.379887  |
| 22               | 6                | 3.644736                | -0.587218 | -0.789296 |
| 23               | 1                | 3.516349                | -0.783827 | -1.859286 |
| 24               | 1                | 4.698769                | -0.815218 | -0.559046 |
| 25               | 6                | 2.369239                | -0.721274 | 2.344018  |
| 26               | 6                | 0.194430                | -0.325388 | 3.300780  |
| 27               | 6                | -1.239954               | -0.825148 | 3.231436  |
| 28               | 6                | 3.381835                | 0.880275  | -0.560254 |
| 29               | 6                | 4.376404                | 1.835817  | -0.792764 |
| 30               | 1                | 5.362896                | 1.523232  | -1.121996 |
| 31               | 6                | 4.081811                | 3.183317  | -0.594024 |
| 32               | 1                | 4.834409                | 3.943299  | -0.782118 |
| 33               | 6                | 2.820228                | 3.533541  | -0.114037 |
| 34               | 1                | 2.536512                | 4.555780  | 0.108536  |
| 35               | 6                | 1.899847                | 2.517592  | 0.119427  |
| 36               | 6                | 0.571828                | 2.781234  | 0.795044  |
| 37               | 7                | 2.157031                | 1.219432  | -0.140575 |
| 38               | 6                | -2.605333               | 0.820709  | 1.982309  |
| 39               | 1                | -1.900692               | 1.558707  | 2.369929  |
| 40               | 1                | -3.487871               | 0.795509  | 2.639206  |
| 41               | 6                | -2.993767               | 1.240832  | 0.577055  |
| 42               | 6                | -4.110682               | 2.026694  | 0.291730  |
| 43               | 1                | -4.781768               | 2.332695  | 1.088371  |
| 44               | 6                | -4.341698               | 2.420586  | -1.029575 |
| 45               | 1                | -5.204700               | 3.034627  | -1.269625 |
| 46               | 6                | -3.455401               | 2.026912  | -2.031439 |
| 47               | 1                | -3.579170               | 2.310873  | -3.070218 |
| 48               | 6                | -2.360643               | 1.246233  | -1.666882 |
| 49               | 6                | -1.289901               | 0.805324  | -2.654593 |

|    |   |           |           |           |
|----|---|-----------|-----------|-----------|
| 50 | 7 | -2.158233 | 0.853502  | -0.399738 |
| 51 | 8 | -0.244930 | 0.257328  | -2.067649 |
| 52 | 8 | -1.450616 | 0.963589  | -3.850450 |
| 53 | 8 | 0.214675  | 3.917737  | 1.055284  |
| 54 | 8 | -0.060403 | 1.673848  | 1.087598  |
| 55 | 1 | -1.218415 | -1.914183 | 3.336916  |
| 56 | 1 | -1.795239 | -0.428656 | 4.095188  |
| 57 | 1 | 0.637308  | -0.656397 | 4.247898  |
| 58 | 1 | 0.261266  | 0.763307  | 3.225677  |
| 59 | 1 | 2.662028  | -0.996110 | 3.365198  |
| 60 | 1 | 2.604247  | 0.335231  | 2.188793  |
| 61 | 1 | 4.186879  | -1.502903 | 1.537347  |
| 62 | 1 | 2.875354  | -2.671449 | 1.679974  |
| 63 | 1 | -0.352183 | -3.674739 | -2.876409 |
| 64 | 1 | -0.921739 | -1.986463 | -2.809948 |
| 65 | 1 | -1.356092 | -4.237989 | -0.754260 |
| 66 | 1 | -2.638102 | -3.435919 | -1.708881 |

-----  
 HF = -1718.207837 Hartrees

Zero-point correction = 0.542356 Hartrees

Sum of electronic and thermal Enthalpies = -1717.632624 Hartrees

Sum of electronic and thermal Free Energies = -1717.727506 Hartrees

[Lu(bp15c5)]<sup>+</sup> (vacuum)  $\Lambda(\lambda\delta)(\lambda\lambda\lambda)$  (0 imaginary frequencies)

| Center<br>Number | Atomic<br>Number | Coordinates (Angstroms) |           |           |
|------------------|------------------|-------------------------|-----------|-----------|
|                  |                  | X                       | Y         | Z         |
| 1                | 71               | 0.026499                | -0.109946 | 0.078391  |
| 2                | 7                | 2.591038                | -1.402004 | -0.313935 |
| 3                | 7                | -1.870781               | -0.485450 | 1.960099  |
| 4                | 8                | 0.862332                | -1.387339 | 2.010376  |
| 5                | 8                | -1.887179               | -1.808360 | -0.443970 |
| 6                | 8                | 0.348592                | -2.644948 | -1.408888 |
| 7                | 6                | -2.769469               | -1.654427 | 1.735088  |
| 8                | 1                | -2.958359               | -2.191934 | 2.674871  |
| 9                | 1                | -3.732091               | -1.278400 | 1.379436  |
| 10               | 6                | -2.243399               | -2.617765 | 0.676583  |
| 11               | 1                | -1.375104               | -3.197398 | 1.017273  |
| 12               | 1                | -3.034859               | -3.325393 | 0.398751  |
| 13               | 6                | -1.973603               | -2.397259 | -1.745206 |
| 14               | 6                | -0.768252               | -3.286854 | -2.016718 |
| 15               | 6                | 1.605485                | -2.941047 | -2.008545 |
| 16               | 1                | 1.759885                | -2.291035 | -2.879624 |
| 17               | 1                | 1.638020                | -3.984298 | -2.349613 |
| 18               | 6                | 2.652166                | -2.749212 | -0.928302 |
| 19               | 1                | 2.460632                | -3.494322 | -0.152831 |
| 20               | 1                | 3.657264                | -2.953489 | -1.330146 |
| 21               | 6                | 3.101875                | -1.453357 | 1.075356  |
| 22               | 1                | 3.296237                | -0.433012 | 1.410108  |
| 23               | 1                | 4.053621                | -2.007332 | 1.136428  |
| 24               | 6                | 3.368934                | -0.461369 | -1.156926 |
| 25               | 1                | 2.983886                | -0.543785 | -2.179803 |
| 26               | 1                | 4.432718                | -0.748968 | -1.187831 |
| 27               | 6                | 2.116899                | -2.094818 | 2.047490  |
| 28               | 1                | 1.933003                | -3.154234 | 1.829335  |
| 29               | 1                | 2.533674                | -2.025972 | 3.059607  |
| 30               | 6                | 0.000092                | -1.665397 | 3.135139  |
| 31               | 1                | 0.592976                | -1.627556 | 4.056831  |
| 32               | 1                | -0.403008               | -2.681617 | 3.033735  |

|    |   |           |           |           |
|----|---|-----------|-----------|-----------|
| 33 | 6 | -1.087285 | -0.602272 | 3.211895  |
| 34 | 1 | -0.610237 | 0.363668  | 3.385972  |
| 35 | 1 | -1.731582 | -0.834060 | 4.075519  |
| 36 | 6 | 3.244506  | 0.972702  | -0.700818 |
| 37 | 6 | 4.241332  | 1.921828  | -0.935393 |
| 38 | 1 | 5.143613  | 1.644403  | -1.471784 |
| 39 | 6 | 4.058748  | 3.223017  | -0.464111 |
| 40 | 1 | 4.816064  | 3.980011  | -0.645183 |
| 41 | 6 | 2.912537  | 3.527731  | 0.269307  |
| 42 | 1 | 2.729989  | 4.506350  | 0.698221  |
| 43 | 6 | 1.974782  | 2.519786  | 0.471831  |
| 44 | 6 | 0.739975  | 2.710137  | 1.331102  |
| 45 | 7 | 2.124867  | 1.281271  | -0.033451 |
| 46 | 6 | -2.667293 | 0.779152  | 1.955760  |
| 47 | 1 | -2.045827 | 1.557967  | 2.402972  |
| 48 | 1 | -3.578941 | 0.670871  | 2.559798  |
| 49 | 6 | -3.006430 | 1.230993  | 0.548593  |
| 50 | 6 | -4.188741 | 1.895039  | 0.216889  |
| 51 | 1 | -4.952475 | 2.062170  | 0.970198  |
| 52 | 6 | -4.365870 | 2.348090  | -1.094064 |
| 53 | 1 | -5.276320 | 2.873255  | -1.367659 |
| 54 | 6 | -3.373955 | 2.114273  | -2.046176 |
| 55 | 1 | -3.463152 | 2.433289  | -3.078329 |
| 56 | 6 | -2.227183 | 1.433442  | -1.642804 |
| 57 | 6 | -1.092592 | 1.075104  | -2.598022 |
| 58 | 7 | -2.060422 | 1.017391  | -0.378157 |
| 59 | 8 | -0.098995 | 0.445084  | -2.007852 |
| 60 | 8 | -1.182959 | 1.348825  | -3.780860 |
| 61 | 8 | 0.515998  | 3.781899  | 1.867111  |
| 62 | 8 | 0.023529  | 1.618777  | 1.425553  |
| 63 | 1 | -0.886872 | -4.293099 | -1.589163 |
| 64 | 1 | -0.629566 | -3.388285 | -3.100433 |
| 65 | 1 | -1.983818 | -1.553829 | -2.436331 |
| 66 | 1 | -2.913802 | -2.952881 | -1.847423 |

-----  
 HF = -1718.2117647 Hartrees

Zero-point correction = 0.541756 Hartrees

Sum of electronic and thermal Enthalpies = -1717.636873 Hartrees

Sum of electronic and thermal Free Energies = -1717.732202 Hartrees

[Lu(bp15c5)]<sup>+</sup> (vacuum)  $\Lambda(\lambda\lambda)(\delta\delta\delta)$  (0 imaginary frequencies)

| Center<br>Number | Atomic<br>Number | Coordinates (Angstroms) |           |           |
|------------------|------------------|-------------------------|-----------|-----------|
|                  |                  | X                       | Y         | Z         |
| 1                | 71               | 0.166327                | -0.066187 | 0.014007  |
| 2                | 7                | 1.958866                | -1.868893 | -0.896140 |
| 3                | 7                | -1.622121               | -0.295442 | 1.963853  |
| 4                | 8                | 0.852278                | -1.684765 | 1.671951  |
| 5                | 8                | -3.537616               | -1.024669 | -0.368096 |
| 6                | 8                | -0.940600               | -2.200930 | -0.885213 |
| 7                | 6                | -2.635497               | -1.393794 | 1.919444  |
| 8                | 6                | -3.845180               | -1.198561 | 1.000516  |
| 9                | 6                | -3.355058               | -2.191874 | -1.154674 |
| 10               | 6                | -2.014940               | -2.112891 | -1.859099 |
| 11               | 6                | -0.042696               | -3.312091 | -1.051905 |
| 12               | 6                | 1.234803                | -2.852852 | -1.738970 |
| 13               | 6                | 2.617581                | -2.554614 | 0.258872  |
| 14               | 6                | 2.926199                | -1.096840 | -1.718811 |
| 15               | 1                | 2.394240                | -0.759962 | -2.615868 |

|    |   |           |           |           |
|----|---|-----------|-----------|-----------|
| 16 | 1 | 3.770299  | -1.724252 | -2.041703 |
| 17 | 6 | 2.264258  | -1.983826 | 1.637764  |
| 18 | 6 | 0.198761  | -1.726839 | 2.966146  |
| 19 | 6 | -0.717816 | -0.516146 | 3.127721  |
| 20 | 6 | 3.417414  | 0.125142  | -0.977753 |
| 21 | 6 | 4.687578  | 0.677493  | -1.143516 |
| 22 | 1 | 5.406173  | 0.209446  | -1.809137 |
| 23 | 6 | 5.010908  | 1.842584  | -0.442008 |
| 24 | 1 | 5.991545  | 2.293876  | -0.560944 |
| 25 | 6 | 4.072420  | 2.409678  | 0.419970  |
| 26 | 1 | 4.272073  | 3.301903  | 1.002375  |
| 27 | 6 | 2.830163  | 1.791787  | 0.537956  |
| 28 | 6 | 1.741942  | 2.287633  | 1.477035  |
| 29 | 7 | 2.516210  | 0.683898  | -0.155799 |
| 30 | 6 | -2.253596 | 1.054563  | 2.070153  |
| 31 | 1 | -1.525831 | 1.713259  | 2.551934  |
| 32 | 1 | -3.148511 | 1.027950  | 2.707126  |
| 33 | 6 | -2.569390 | 1.665388  | 0.716255  |
| 34 | 6 | -3.609507 | 2.571774  | 0.506583  |
| 35 | 1 | -4.282657 | 2.832268  | 1.317762  |
| 36 | 6 | -3.764431 | 3.140393  | -0.760575 |
| 37 | 1 | -4.566605 | 3.849945  | -0.941130 |
| 38 | 6 | -2.891113 | 2.788218  | -1.790075 |
| 39 | 1 | -2.970559 | 3.193409  | -2.792252 |
| 40 | 6 | -1.880544 | 1.874575  | -1.505576 |
| 41 | 6 | -0.876489 | 1.393211  | -2.548616 |
| 42 | 7 | -1.735055 | 1.342030  | -0.281057 |
| 43 | 8 | 0.008083  | 0.544036  | -2.063234 |
| 44 | 8 | -0.958827 | 1.779501  | -3.699210 |
| 45 | 8 | 1.944896  | 3.249205  | 2.196520  |
| 46 | 8 | 0.651748  | 1.562651  | 1.412327  |
| 47 | 1 | 1.868376  | -3.722009 | -1.977551 |
| 48 | 1 | 0.971426  | -2.364078 | -2.681247 |
| 49 | 1 | -0.526312 | -4.101959 | -1.635528 |
| 50 | 1 | 0.155736  | -3.710064 | -0.053070 |
| 51 | 1 | -1.917494 | -2.926285 | -2.585552 |
| 52 | 1 | -1.910911 | -1.163943 | -2.388135 |
| 53 | 1 | -3.407678 | -3.102033 | -0.541961 |
| 54 | 1 | -4.151475 | -2.243635 | -1.910568 |
| 55 | 1 | -4.504427 | -2.066513 | 1.148950  |
| 56 | 1 | -4.418332 | -0.314894 | 1.293765  |
| 57 | 1 | -2.117582 | -2.314026 | 1.632926  |
| 58 | 1 | -3.041524 | -1.547579 | 2.934092  |
| 59 | 1 | -0.098231 | 0.376300  | 3.224575  |
| 60 | 1 | -1.291058 | -0.646381 | 4.060172  |
| 61 | 1 | 0.951926  | -1.696677 | 3.759652  |
| 62 | 1 | -0.334684 | -2.680632 | 3.034704  |
| 63 | 1 | 2.498105  | -2.733929 | 2.401122  |
| 64 | 1 | 2.821402  | -1.069407 | 1.863476  |
| 65 | 1 | 3.708636  | -2.524082 | 0.148292  |
| 66 | 1 | 2.335061  | -3.610770 | 0.241831  |

-----  
HF = -1718.2085561 Hartrees

Zero-point correction = 0.541923 Hartrees

Sum of electronic and thermal Enthalpies = -1717.633735 Hartrees

Sum of electronic and thermal Free Energies = -1717.728238 Hartrees

[Lu(bp15c5)]<sup>+</sup> (vacuum)  $\Lambda(\lambda\delta)(\delta\lambda\delta)$  (0 imaginary frequencies)

| Center Number | Atomic Number |   | Coordinates (Angstroms) |           |           |
|---------------|---------------|---|-------------------------|-----------|-----------|
|               |               |   | X                       | Y         | Z         |
| 1             | 71            | 0 | -0.033390               | 0.076630  | 0.020379  |
| 2             | 7             | 0 | -2.491937               | 1.538499  | -0.494775 |
| 3             | 7             | 0 | 1.721826                | 0.098029  | 2.063656  |
| 4             | 8             | 0 | -0.984859               | 1.085631  | 2.009493  |
| 5             | 8             | 0 | 1.995061                | 1.870488  | -0.053740 |
| 6             | 8             | 0 | -0.136361               | 2.965462  | -1.029560 |
| 7             | 6             | 0 | 2.603766                | 1.284047  | 2.148136  |
| 8             | 6             | 0 | 3.133276                | 1.711648  | 0.790800  |
| 9             | 6             | 0 | 2.174961                | 2.694218  | -1.216886 |
| 10            | 6             | 0 | 1.058628                | 3.715003  | -1.186974 |
| 11            | 6             | 0 | -1.303010               | 3.748030  | -0.861783 |
| 12            | 6             | 0 | -2.476983               | 2.848646  | -1.197660 |
| 13            | 6             | 0 | -3.066710               | 1.634800  | 0.870754  |
| 14            | 1             | 0 | -3.476311               | 0.657891  | 1.136016  |
| 15            | 1             | 0 | -3.901258               | 2.354688  | 0.900424  |
| 16            | 6             | 0 | -3.305000               | 0.628526  | -1.349703 |
| 17            | 1             | 0 | -2.846022               | 0.636916  | -2.344639 |
| 18            | 1             | 0 | -4.334931               | 1.003744  | -1.459821 |
| 19            | 6             | 0 | -2.079792               | 2.023455  | 1.970254  |
| 20            | 1             | 0 | -1.675107               | 3.034011  | 1.849376  |
| 21            | 1             | 0 | -2.610733               | 1.984473  | 2.929449  |
| 22            | 6             | 0 | -0.250994               | 1.100530  | 3.255034  |
| 23            | 1             | 0 | -0.946947               | 0.891940  | 4.076607  |
| 24            | 1             | 0 | 0.155582                | 2.108282  | 3.406223  |
| 25            | 6             | 0 | 0.828496                | 0.018939  | 3.246971  |
| 26            | 1             | 0 | 0.345660                | -0.958405 | 3.218368  |
| 27            | 1             | 0 | 1.389552                | 0.100547  | 4.192111  |
| 28            | 6             | 0 | -3.329633               | -0.793151 | -0.856262 |
| 29            | 6             | 0 | -4.429653               | -1.629648 | -1.056914 |
| 30            | 1             | 0 | -5.314181               | -1.252368 | -1.560683 |
| 31            | 6             | 0 | -4.370081               | -2.947280 | -0.601003 |
| 32            | 1             | 0 | -5.209998               | -3.618308 | -0.754542 |
| 33            | 6             | 0 | -3.230271               | -3.377929 | 0.075000  |
| 34            | 1             | 0 | -3.128382               | -4.376964 | 0.483049  |
| 35            | 6             | 0 | -2.184358               | -2.475434 | 0.246142  |
| 36            | 6             | 0 | -0.940082               | -2.823826 | 1.032382  |
| 37            | 7             | 0 | -2.222345               | -1.217020 | -0.230321 |
| 38            | 6             | 0 | 2.529848                | -1.146729 | 1.908029  |
| 39            | 1             | 0 | 1.909372                | -1.985045 | 2.231645  |
| 40            | 1             | 0 | 3.423562                | -1.111735 | 2.547966  |
| 41            | 6             | 0 | 2.922640                | -1.419994 | 0.466642  |
| 42            | 6             | 0 | 4.076646                | -2.122890 | 0.112081  |
| 43            | 1             | 0 | 4.772901                | -2.453567 | 0.876764  |
| 44            | 6             | 0 | 4.312954                | -2.398419 | -1.237585 |
| 45            | 1             | 0 | 5.202191                | -2.948939 | -1.530485 |
| 46            | 6             | 0 | 3.404838                | -1.961038 | -2.202638 |
| 47            | 1             | 0 | 3.539622                | -2.144176 | -3.262518 |
| 48            | 6             | 0 | 2.279203                | -1.262732 | -1.773239 |
| 49            | 6             | 0 | 1.212647                | -0.733320 | -2.727993 |
| 50            | 7             | 0 | 2.059285                | -1.007087 | -0.472766 |
| 51            | 8             | 0 | 0.198397                | -0.169656 | -2.106085 |
| 52            | 8             | 0 | 1.363010                | -0.846821 | -3.929971 |
| 53            | 8             | 0 | -0.820781               | -3.916964 | 1.559902  |
| 54            | 8             | 0 | -0.088151               | -1.834316 | 1.082911  |
| 55            | 1             | 0 | 1.192321                | 4.405336  | -0.339967 |
| 56            | 1             | 0 | 1.033299                | 4.300034  | -2.117564 |

|    |   |   |           |          |           |
|----|---|---|-----------|----------|-----------|
| 57 | 1 | 0 | 2.109806  | 2.067579 | -2.111751 |
| 58 | 1 | 0 | 3.153055  | 3.185698 | -1.196267 |
| 59 | 1 | 0 | -3.422378 | 3.390325 | -1.032935 |
| 60 | 1 | 0 | -2.403840 | 2.635778 | -2.266620 |
| 61 | 1 | 0 | -1.343748 | 4.169267 | 0.153376  |
| 62 | 1 | 0 | -1.309942 | 4.594437 | -1.563851 |
| 63 | 1 | 0 | 3.659434  | 2.668860 | 0.899510  |
| 64 | 1 | 0 | 3.831949  | 0.985342 | 0.360170  |
| 65 | 1 | 0 | 3.443313  | 1.103474 | 2.837593  |
| 66 | 1 | 0 | 2.026492  | 2.119927 | 2.550411  |

-----  
HF = -1718.210919 Hartrees

Zero-point correction = 0.542189 Hartrees

Sum of electronic and thermal Enthalpies = -1717.635670 Hartrees

Sum of electronic and thermal Free Energies = -1717.731497 Hartrees
